# Supplementary material for: ncRNA2MetS: a manually curated database for non-coding RNAs associated with metabolic syndrome
Source: PeerJ. 2019 Oct 15;7:e7909. doi: 10.7717/peerj.7909 (PMC6798904; doi:10.7717/peerj.7909)
Supplement: Supplemental Information 1 — ncRNA2MetS currently contains 1,068 entries of associations between 627 ncRNAs (543 miRNAs and 84 lncRNAs) and 5 metabolic syndrome traits (abdominal obesity, type 2 diabetes mellitus, hypertension, hyperlipidaemia and hypolipoproteinaemia) in 4 species (human, mouse, rat and pig). [file peerj-07-7909-s001.xlsx]

## Sheet: ncRNA2MetS-1068
Category	Species	Biomolecule name	Biomolecule ID	Disease name	Disease ontology	ICD-11 classification	Tissue	PubMed_ID	Interaction gene symbol	Expression direction	Experimental method	Experimental method classification	Throughput	Description	Reference title	Year	GEO ID
lncRNA	Homo sapiens	AC011891.5	NONHSAG046963.2	obesity	DOID:9970	5B81	adipose tissue	29884798	-	upregulation	microarray/RT-qPCR	microarray;qRT-PCR	Low-throughput	This study for the first time identifies an expression profile of differentially expressed lncRNAs in obese children and indicated hub lncRNA RP11-20G13.3 attenuated adipogenesis of preadipocytes, which is conducive to the search for new diagnostic and therapeutic strategies of childhood obesity.	Integrated analysis of long noncoding RNA and mRNA expression profile in children with obesity by microarray analysis	2018	GSE104815
lncRNA	Homo sapiens	AC092159.2	NONHSAG026781.3	obesity	DOID:9970	5B81	adipose tissue	30753134	TMEM18	upregulation	qPCR/Luciferase reporter assays /Western blot	PCR;luciferase assay;Immunoblotting	Low-throughput	We concluded that lncRNA AC092159.2 promoted human adipocytes differentiation possibly by regulating TMEM18.	The role and possible mechanism of lncRNA AC092159.2 in modulating adipocyte differentiation	2019	-
lncRNA	Mus musculus	Adiponectin-AS	-	obesity	DOID:9970	5B81	adipocyte	29414510	-	association	-	-	-	In conclusion, AdipoQ AS lncRNA transfer from nucleus to cytoplasm inhibits adipogenesis through formation of an AdipoQ AS lncRNA/AdipoQ mRNA duplex to suppress the translation of AdipoQ mRNA. Taken together, we suggest that AdipoQ AS lncRNA is a novel therapeutic target for obesity-related metabolic diseases.	Adiponectin AS lncRNA inhibits adipogenesis by transferring from nucleus to cytoplasm and attenuating Adiponectin mRNA translation	2018	-
lncRNA	Mus musculus	AK079912	-	obesity	DOID:9970	5B81	brown adipocyte	29341928	PPARγ	upregulation	real-time PCR/luciferase reporter assay/Western blotting	PCR;luciferase assay;Immunoblotting	Low-throughput	Lastly, reporter and pharmacological assays identify Pparγ as an upstream regulator of AK079912. These results provide new insights into the function of non-coding RNAs in brown adipogenesis and regulating browning of white adipocytes.	A novel brown adipocyte-enriched long non-coding RNA that is required for brown adipocyte differentiation and sufficient to drive thermogenic gene program in white adipocytes	2018	-
lncRNA	Rattus norvegicus	AK094457	-	hypertension	DOID:10763	BA00	vascular endothelial cell	26045775	-	upregulation	qRT-PCR/Western blotting	PCR;Immunoblotting	Low-throughput	We conclude that NR1 reduces the caudal blood pressure of SHR through induction of iNOS regulated by long non-coding RNA AK094457. These findings may have important implications for understanding the mechanisms of NR1 regulation blood pressure.	Notoginsenoside R1 reduces blood pressure in spontaneously hypertensive rats through a long non-coding RNA AK094457	2015	GSE38783
lncRNA	Homo sapiens	AK098656	-	hypertension	DOID:10763	BA00	plasma	29279317		upregulation	microarray/Immunoprecipitation	microarray;Immunoblotting	Low-throughput	All these data indicated AK098656 as a new human VSMC-dominant lncRNA, which could promote hypertension through accelerating contractile protein degradation, increasing VSMC synthetic phenotype, and finally narrowed resistance arteries.	AK098656, a Novel Vascular Smooth Muscle Cell-Dominant Long Noncoding RNA, Promotes Hypertension	2018	-
lncRNA	Homo sapiens	ASMER-1	ENSG00000235609.4	obesity	DOID:9970	5B81	white adipose tissue	29580841	-	differential expression	RNA-Seq	sequencing	High-throughput	Our data demonstrate that lncRNAs are modulators of the metabolic and secretory functions in human fat cells and provide an emerging link between WAT and common metabolic conditions.	Long Non-Coding RNAs Associated with Metabolic Traits in Human White Adipose Tissue	2018	GSE101492
lncRNA	Homo sapiens	ASMER-2	CATG00000111229.1	obesity	DOID:9970	5B81	white adipose tissue	29580841	-	differential expression	RNA-Seq	sequencing	High-throughput	Our data demonstrate that lncRNAs are modulators of the metabolic and secretory functions in human fat cells and provide an emerging link between WAT and common metabolic conditions.	Long Non-Coding RNAs Associated with Metabolic Traits in Human White Adipose Tissue	2018	GSE101492
lncRNA	Mus musculus	Blnc1	-	obesity	DOID:9970	5B81	liver	30061575	-	upregulation	RT-qPCR/luciferase reporter assay/Western blotting	PCR;sequencing;luciferase assay;Immunoblotting	High-throughput	These findings illustrate a lncRNA transcriptional checkpoint that licenses excess hepatic lipogenesis to exacerbate insulin resistance and NAFLD.	Long noncoding RNA licensing of obesity-linked hepatic lipogenesis and NAFLD pathogenesis	2018	GSE101492
lncRNA	Mus musculus	Blnc1	-	obesity	DOID:9970	5B81	adipose tissue	29934059	-	association	microarray /RT-qPCR/ Immunoblotting analysis	microarray;RT-qPCR;Immunoblotting	Low-throughput	This study illustrates a surprisingly pleiotropic and dominant role of lncRNA in driving adaptive adipose tissue remodeling and preserving metabolic health.	The long noncoding RNA Blnc1 orchestrates homeostatic adipose tissue remodelling to preserve metabolic health	2018	GSE111865
lncRNA	Homo sapiens	CARMEN	NONHSAG041903.3	hypertension	DOID:10763	BA00	peripheral blood	29917257	-	upregulation	RT-PCR	PCR	Low-throughput	Our data reveal that the lncRNAs MHRT, FENDRR and CARMEN show distinct expression profiles in hypertensive patients and they possibly represent candidate therapeutic targets in hypertensive heart disease.	The long non-coding RNAs MHRT, FENDRR and CARMEN, their expression levels in peripheral blood mononuclear cells in patients with essential hypertension and their relation to heart hypertrophy	2018	-
lncRNA	Homo sapiens	CDKN2B-AS1	NONHSAG101229.2	type 2 diabetes mellitus	DOID:9352	5A11	kidney	30108282	RBMS1	association	-	-	-	We conclude that the distal and proximal polyadenylated CDKN2B-AS1 transcripts have separate functions in gene regulation, which are independent of the circular CDKN2B-AS1 isoforms and of the genes CDKN2A/2B.	Linear isoforms of the long noncoding RNA CDKN2B-AS1 regulate the c-myc-enhancer binding factor RBMS1	2019	-
lncRNA	Mus musculus	Cebpd	-	obesity	DOID:9970	5B81	brown adipose tissue	25773316	-	association	microarray	microarray	Low-throughput	Collectively, our findings indicated lncRNAs are involved in mouse BAT development and provide potential targets for obesity therapy.	Transcriptome analysis reveals the potential contribution of long noncoding RNAs to brown adipocyte differentiation	2015	-
lncRNA	Homo sapiens	CTBP1-AS2	NONHSAG037257.3	type 2 diabetes mellitus	DOID:9352	5A11	peripheral blood	30506719	-	downregulation	qRT-PCR	PCR	Low-throughput	lncRNA VIM-AS1 and lncRNA CTBP1-AS2 expression levels are associated with T2D susceptibility.	Clinical significance of long noncoding RNA VIM-AS1 and CTBP1-AS2 expression in type 2 diabetes	2018	-
lncRNA	Homo sapiens	DNM3OS	NONHSAG003468.2	type 2 diabetes mellitus	DOID:9352	5A11	macrophage	29930005	-	upregulation	RNA-seq/real-time qPCR	sequencing;PCR	High-throughput	These results demonstrate novel mechanisms involving upregulation of long noncoding RNA Dnm3os, disruption of its interaction with nucleolin, and epigenetic modifications at target genes that promote macrophage inflammatory phenotype in diabetes mellitus.	Diabetes Mellitus-Induced Long Noncoding RNA Dnm3os Regulates Macrophage Functions and Inflammation via Nuclear Mechanisms	2018	GSE107557
lncRNA	Mus musculus	E330013P06	-	type 2 diabetes mellitus	DOID:9352	5A11	macrophage	25008173	-	upregulation	RT-qPCR	PCR	Low-throughput	These results define the diabetic macrophage transcriptome and novel functional roles for lncRNAs in macrophages that could lead to lncRNA-based therapies for inflammatory diabetes complications.	Regulation of inflammatory phenotype in macrophages by a diabetes-induced long noncoding RNA	2014	-
lncRNA	Sus scrofa	ENSMUST00000189966	NONMMUG038314.3	obesity	DOID:9970	5B81	adipose tissue	28724410	NR2F2	differential expression	RNA-seq/qRT-PCR	sequencing;PCR	High-throughput	These results suggested that lncRNAs and their target genes might have participated in the castration-induced fat deposition and provide a new therapeutic target for combatting testosterone deficiency-related obesity.	Identification and characterization of long non-coding RNAs in subcutaneous adipose tissue from castrated and intact full-sib pair Huainan male pigs.	2017	-
lncRNA	Homo sapiens	ENST00000550337.1	NONHSAG010934.2	type 2 diabetes mellitus	DOID:9352	5A11	peripheral blood	28407663	-	upregulation	microarray/RT-qPCR	array;PCR	Low-throughput	LncRNA ENST00000550337.1 is a potential diagnostic biomarker for pre-diabetes and T2DM.	The Diagnostic Value of Whole Blood lncRNA ENST00000550337.1 for Pre-Diabetes and Type 2 Diabetes Mellitus	2017	-
lncRNA	Homo sapiens	FENDRR	NONHSAG020218.3	hypertension	DOID:10763	BA00	peripheral blood	29917257	-	upregulation	RT-PCR	PCR	Low-throughput	Our data reveal that the lncRNAs MHRT, FENDRR and CARMEN show distinct expression profiles in hypertensive patients and they possibly represent candidate therapeutic targets in hypertensive heart disease.	The long non-coding RNAs MHRT, FENDRR and CARMEN, their expression levels in peripheral blood mononuclear cells in patients with essential hypertension and their relation to heart hypertrophy	2018	-
lncRNA	Mus musculus	Gas5	NONMMUG002215.2	obesity	DOID:9970	5B81	adipocyte	30020817	miR-21a-5p/PTEN	association	luciferase assays	luciferase assays	Low-throughput	Together, GAS5 plays a suppressive role in 3T3-L1 cells adipogenesis, which further highlights the importance of lncRNAs in adipogenesis.	Long Noncoding RNA GAS5 Suppresses 3T3-L1 Cells Adipogenesis Through miR-21a-5p/PTEN Signal Pathway	2018	-
lncRNA	Homo sapiens	GAS5	NONHSAG003504.3	type 2 diabetes mellitus	DOID:9352	5A11	serum	26675493	-	downregulation	real-time qPCR	PCR	Low-throughput	lncRNA GAS5 levels are correlated to prevalence of T2DM. Assessment of GAS5 in serum along with other parameters offers greater accuracy in identifying individuals at-risk for diabetes.	Circulating long noncoding RNA GAS5 levels are correlated to prevalence of type 2 diabetes mellitus	2015	-
lncRNA	Homo sapiens	GAS5	NONHSAG003504.3	type 2 diabetes mellitus	DOID:9352	5A11	adipose tissue	30661991	-	downregulation	qRT-PCR/CHIP-RIP	PCR;CHIP-RIP	Low-throughput	NP-C86 may be used as a molecular probe to investigate the intricacies of GAS5 in relevant biological systems as it offers specificity, efficient cellular uptake and is non-cytotoxic.	Stabilization of lncRNA GAS5 by a Small Molecule and Its Implications in Diabetic Adipocytes	2019	-
lncRNA	Mus musculus	Gas5	NONMMUG002215.2	type 2 diabetes mellitus	DOID:9352	5A11	islet	29232661	-	downregulation	qRT-PCR	PCR	Low-throughput	These results indicate that lncRNA Gas5 might perform as a new regulator, maintaining β cell identity and function by affecting insulin synthesis and secretion.	Downregulation of Long Noncoding RNA Gas5 Affects Cell Cycle and Insulin Secretion in Mouse Pancreatic β Cells	2017	-
lncRNA	Mus musculus	Gm10768	-	type 2 diabetes mellitus	DOID:9352	5A11	liver	29363576	miR-214	upregulation	RNA-seq/qRT-PCR	sequencing;PCR	High-throughput	We identified Gm10768 as a new lncRNA activating hepatic gluconeogenesis through antagonizing miR-214 in mice.	The long non-coding RNA Gm10768 activates hepatic gluconeogenesis by sequestering microRNA-214 in mice	2018	-
lncRNA	Mus musculus	Gm13133	-	obesity	DOID:9970	5B81	brown adipose tissue	28247947	-	association	-	-	-	Our results identified a lncRNA-mediated modulation in primary mouse white adipocyte differentiation and indicate the functional significance of GM13133 in promoting browning of white adipocytes and maintenance of thermogenesis, further providing a potential strategy to treating obesity.	GM13133 is a negative regulator in mouse white adipocytes differentiation and drives the characteristics of brown adipocytes	2018	-
lncRNA	Mus musculus	Gm15051	-	obesity	DOID:9970	5B81	brown adipose tissue	25773316	-	association	microarray	microarray	Low-throughput	Collectively, our findings indicated lncRNAs are involved in mouse BAT development and provide potential targets for obesity therapy.	Transcriptome analysis reveals the potential contribution of long noncoding RNAs to brown adipocyte differentiation	2015	-
lncRNA	Mus musculus	Gm15290	-	obesity	DOID:9970	5B81	white adipose tissue	28943435	miR-27b/PPARγ	upregulation	qPCR/luciferase reporter assay	PCR;luciferase assay	Low-throughput	In conclusion, Gm15290 sponges miR-27b to increase fat deposition and body weight in HFD-fed mice.	LncRNA Gm15290 sponges miR-27b to promote PPARγ-induced fat deposition and contribute to body weight gain in mice	2017	-
lncRNA	Homo sapiens	GYG2P1	NONHSAG055778.2	obesity	DOID:9970	5B81	adipose tissue	29884798	-	downregulation	microarray/RT-qPCR	microarray;qRT-PCR	Low-throughput	This study for the first time identifies an expression profile of differentially expressed lncRNAs in obese children and indicated hub lncRNA RP11-20G13.3 attenuated adipogenesis of preadipocytes, which is conducive to the search for new diagnostic and therapeutic strategies of childhood obesity.	Integrated analysis of long noncoding RNA and mRNA expression profile in children with obesity by microarray analysis	2018	GSE104815
lncRNA	Rattus norvegicus	H19	-	metabolic syndrome	DOID:14221	5A44	liver	26880735	IGF2	downregulation	qRT-PCR/Chromatin Immunoprecipitation (ChIP)	PCR;Immunoblotting	Low-throughput	Heritable growth restriction is associated with changes in H19 gene expression; these changes are reversible with diet supplementation to favourably impact adult metabolic syndrome.	Alterations in expression of imprinted genes from the H19/IGF2 loci in a multigenerational model of intrauterine growth restriction (IUGR)	2016	-
lncRNA	Homo sapiens	H19	NONHSAG007409.2	type 2 diabetes mellitus	DOID:9352	5A11	whole blood	29981420	-	association	PCR-RFLP	PCR	Low-throughput	Our findings provided the evidence of significant association between H19 rs217727-TT and MEG3 rs7158663-AA genotypes with T2D susceptibility.	Genetic variants in long noncoding RNA H19 and MEG3 confer risk of type 2 diabetes in an Iranian population	2018	-
lncRNA	Homo sapiens	H19	NONHSAG007409.2	type 2 diabetes mellitus	DOID:9352	5A11	muscle tissue	25399420	let-7	downregulation	RT-qPCR	PCR	Low-throughput	Our results reveal a previously undescribed double-negative feedback loop between sponge lncRNA and target miRNA that contributes to glucose regulation in muscle cells.	The H19/let-7 double-negative feedback loop contributes to glucose metabolism in muscle cells	2014	-
lncRNA	Mus musculus	H19	NONMMUG039673.2	type 2 diabetes mellitus	DOID:9352	5A11	liver	28814771	FoxO1	downregulation	RNA-seq/qRT-PCR	sequencing;PCR	High-throughput	Our results reveal a novel link between decreased H19 levels and impaired gluconeogenesis via regulation of FoxO1 nuclear levels. These put forth interesting observations on the regulatory role of H19 in altering hepatic physiology during diabetes.	RNA sequencing of db/db mice liver identifies lncRNA H19 as a key regulator of gluconeogenesis and hepatic glucose output	2017	-
lncRNA	Mus musculus	H19	NONMMUG039673.2	type 2 diabetes mellitus	DOID:9352	5A11	liver	29769440	Hnf4a	upregulation	RNA-seq/qRT-PCR	sequencing;PCR	High-throughput	Our findings offer a mechanistic explanation of lncRNA H19's role in the pathogenesis of diabetic hyperglycemia and suggest that targeting hepatic H19 may hold the potential of new treatment for this disease.	Elevated hepatic expression of H19 long noncoding RNA contributes to diabetic hyperglycemia	2018	GSE103437
lncRNA	Mus musculus	H19	NONMMUG039673.2	hypo-HDL cholesterolemia	DOID:1387	5C81.Z	macrophage	29172088	miR-130b	upregulation	RT-PCR/luciferase report assays/Western blotting	PCR;Luciferase assay;Immunoblotting	Low-throughput	Our research indicated a H19-miR130b pathway in regulating lipid metabolism and inflammation response in ox-LDL-treated Raw264.7 cells, providing new targets for AS treatment.	Silencing of H19 inhibits the adipogenesis and inflammation response in ox-LDL-treated Raw264.7 cells by up-regulating miR-130b	2018	-
lncRNA	Homo sapiens	H19	NONHSAG007409.2	obesity	DOID:9970	5B81	brown adipose tissue	30190464	-	downregulation	qRT-PCR/RNA-seq/Immunoblot analysis	PCR;sequencing;Immunoblotting	High-throughput	We observed maternally expressed, imprinted lncRNA H19 increased upon cold-activation and decreased in obesity in BAT. This has implications for our understanding how monoallelic gene expression affects metabolism in rodents and, potentially, humans.	LincRNA H19 protects from dietary obesity by constraining expression of monoallelic genes in brown fat	2018	GSE116227
lncRNA	Mus musculus	H19	NONMMUG039673.2	obesity	DOID:9970	5B81	brown adipose tissue	30190464	-	downregulation	qRT-PCR/RNA-seq/Immunoblot analysis	PCR;sequencing;Immunoblotting	High-throughput	We observed maternally expressed, imprinted lncRNA H19 increased upon cold-activation and decreased in obesity in BAT. This has implications for our understanding how monoallelic gene expression affects metabolism in rodents and, potentially, humans.	LincRNA H19 protects from dietary obesity by constraining expression of monoallelic genes in brown fat	2018	GSE116227
lncRNA	Homo sapiens	HCG27_201	NONHSAG043461.3	type 2 diabetes mellitus	DOID:9352	5A11	peripheral blood	30328000	-	downregulation	real-time qPCR	PCR	Low-throughput	Lower expression of our two studied long non-coding RNAs LY86-AS1 and HCG27_201 in type 2 diabetes mellitus patients indicates their role in the pathogenesis of T2DM. Furthermore, LY86-AS1 could possibly be used as a diagnostic marker for T2DM.	Long non-coding RNA LY86-AS1 and HCG27_201 expression in type 2 diabetes mellitus	2018	-
microRNA	Homo sapiens	hcmv-miR-UL112	MIMAT0001577	hypertension	DOID:10763	BA00	plasma	21690488	IRF1	differential expression	microarray /RT-qPCR/ Immunoblotting analysis	microarray;PCR;Immunoblotting	Low-throughput	We report for the first time a circulating miRNA profile for hypertensive patients and demonstrate a novel link between HCMV infection and essential hypertension. These findings may reveal important insights into the pathogenesis of essential hypertension.	Signature microRNA expression profile of essential hypertension and its novel link to human cytomegalovirus infection	2011	-
lncRNA	Homo sapiens	HI-LNC25	NONHSAG031776.3	type 2 diabetes mellitus	DOID:9352	5A11	islet	23040067	GLIS3	downregulation	RNA-seq/ChIP-seq	sequencing	High-throughput	These findings reveal a new class of islet-cell genes relevant to β cell programming and diabetes pathophysiology.	Human β cell transcriptome analysis uncovers lncRNAs that are tissue-specific, dynamically regulated, and abnormally expressed in type 2 diabetes	2012	-
lncRNA	Homo sapiens	HOTAIR	NONHSAG011264.3	type 2 diabetes mellitus	DOID:9352	5A11	liver	30536334	SIRT1	upregulation	qRT-PCR	PCR	Low-throughput	Upregulated HOTAIR promotes hepatic insulin resistance by inhibiting SIRT1 expression and AKT/GSK pathway.	HOTAIR participates in hepatic insulin resistance via regulating SIRT1	2018	-
lncRNA	Mus musculus	Hotair	NONMMUG015565.2	obesity	DOID:9970	5B81	preadipocyte	29137239	Sam68	upregulation	RNA-seq/qRT-PCR	sequencing;PCR	High-throughput	Our findings define a new role for Sam68 as a regulator of lncRNAs during adipogenic differentiation.	Transcriptome profiling in preadipocytes identifies long noncoding RNAs as Sam68 targets	2017	-
lncRNA	Homo sapiens	HOTAIR	NONHSAG011264.3	obesity	DOID:9970	5B81	adipose tissue	24862299	-	differential expression	microarray/RT-qPCR	microarray;PCR	Low-throughput	HOTAIR is expressed in gluteal adipose and may regulate key processes in adipocyte differentiation. The role of this lncRNA in determining the metabolic properties of gluteal compared with abdominal adipocytes merits further study.	Identification of a novel lncRNA in gluteal adipose tissue and evidence for its positive effect on preadipocyte differentiation	2014	-
lncRNA	Homo sapiens	HOXA11-AS1	NONHSAG047191.3	obesity	DOID:9970	5B81	adipose tissue	29217197	-	upregulation	RT-PCR/Western blotting	PCR;Immunoblotting	Low-throughput	The results provide new insight into the molecular mechanism by which lncRNA HOXA11-AS1 is involved in adipogenesis and may have implications for the treatment of obesity and associated disorders.	Effect of lncRNA HOXA11-AS1 on adipocyte differentiation in human adipose-derived stem cells	2018	-
microRNA	Homo sapiens	hsa-let-7	MIMAT0000062	type 2 diabetes mellitus	DOID:9352	5A11	peripheral blood	23660113	Lin28	association	PCR-RFLP	PCR	Low-throughput	In summary, the results indicated that the rs3811463 polymorphism in the let-7/Lin28 pathway could significantly increase the risk of T2DM.	The polymorphism in the let-7 targeted region of the Lin28 gene is associated with increased risk of type 2 diabetes mellitus	2013	-
microRNA	Homo sapiens	hsa-let-7a	MIMAT0000062	type 2 diabetes mellitus	DOID:9352	5A11	skeletal muscle	24105413	IL-13	upregulation	qRT-PCR	PCR	Low-throughput	In conclusion, IL-13 plays an autocrine role in skeletal muscle to increase glucose uptake and metabolism, suggesting a role in glucose homeostasis in metabolic disease.	Autocrine role of interleukin-13 on skeletal muscle glucose metabolism in type 2 diabetic patients involves microRNA let-7	2013	-
microRNA	Homo sapiens	hsa-let-7a	MIMAT0000062	type 2 diabetes mellitus	DOID:9352	5A11	plasma	24937531	-	downregulation	qRT-PCR	PCR	Low-throughput	Quantitative RT-PCR validation confirmed the significant up-regulation of miR-326 (P = .004) and down-regulation of let-7a (P < .001) and let-7f (P = .003).	Plasma exosome microRNA profiling unravels a new potential modulator of adiponectin pathway in diabetes: effect of glycemic control	2014	-
microRNA	Homo sapiens	hsa-let-7b	MIMAT0000063	type 2 diabetes mellitus	DOID:9352	5A11	plasma	29643835	-	upregulation	qRT-PCR	PCR	Low-throughput	let-7b, miR-142, miR-144, and miR-29a in plasma may be important markers of neuroendocrine stress response and may play a role in the pathogenesis of T2DM and IR.	Identification of Neuroendocrine Stress Response-Related Circulating MicroRNAs as Biomarkers for Type 2 Diabetes Mellitus and Insulin Resistance	2018	-
microRNA	Homo sapiens	hsa-let-7c	MIMAT0000064	hypertension	DOID:10763	BA00	medulla	22042811	NR4A2	differential expression	microarray/qRT-PCR/luciferase assays	microarray;PCR;Luciferase assay	Low-throughput	The observed downregulation of 2 miRNAs in hypertension could explain the elevation in intrarenal renin mRNA. Renin, CD36, and other mRNAs, as well as miRNAs and associated pathways identified in the present study, provide novel insights into hypertension etiology.	Gene expression profiling reveals renin mRNA overexpression in human hypertensive kidneys and a role for microRNAs	2011	GSE28260
microRNA	Homo sapiens	hsa-let-7d	MIMAT0000065	type 2 diabetes mellitus	DOID:9352	5A11	skeletal muscle	24105413	IL-13	upregulation	qRT-PCR	PCR	Low-throughput	In conclusion, IL-13 plays an autocrine role in skeletal muscle to increase glucose uptake and metabolism, suggesting a role in glucose homeostasis in metabolic disease.	Autocrine role of interleukin-13 on skeletal muscle glucose metabolism in type 2 diabetic patients involves microRNA let-7	2013	-
microRNA	Homo sapiens	hsa-let-7e	MIMAT0000066	metabolic syndrome	DOID:14221	5A44	plasma	26046362	-	association	qPCR	PCR	Low-throughput	These results suggest that changes in the plasma levels of Let-7e and miR-126 could represent early markers of metabolic dysfunction in children with MetS traits.	Micro-RNAs Let7e and 126 in Plasma as Markers of Metabolic Dysfunction in 10 to 12 Years Old Children	2015	-
microRNA	Homo sapiens	hsa-let-7e	MIMAT0000066	hypertension	DOID:10763	BA00	plasma	30519661	-	upregulation	qRT-PCR	PCR	Low-throughput	Results from this study indicate that miRNA let-7e can potentially be a biomarker for essential hypertension.	Differential expression of MicroRNA let-7e and 296-5p in plasma of Egyptian patients with essential hypertension	2018	-
microRNA	Homo sapiens	hsa-let-7e	MIMAT0000066	hypertension	DOID:10763	BA00	plasma	25837765	-	upregulation	qRT-PCR	PCR	Low-throughput	We report for the first time a plasma miRNA profile for WCH patients and demonstrate a novel link between miRNA and WCH. These findings may reveal crucial insights into the development of WCH.	Differential expression of hypertension-associated microRNAs in the plasma of patients with white coat hypertension	2015	-
microRNA	Homo sapiens	hsa-let-7e	MIMAT0000066	hypertension	DOID:10763	BA00	plasma	21690488	-	differential expression	microarray /RT-qPCR/ Immunoblotting analysis	microarray;PCR;Immunoblotting	Low-throughput	We report for the first time a circulating miRNA profile for hypertensive patients and demonstrate a novel link between HCMV infection and essential hypertension. These findings may reveal important insights into the pathogenesis of essential hypertension.	Signature microRNA expression profile of essential hypertension and its novel link to human cytomegalovirus infection	2011	-
microRNA	Homo sapiens	hsa-let-7e	MIMAT0000066	hypo-HDL cholesterolemia	DOID:1387	5C81.Z	plasma	26046362	-	association	qPCR	PCR	Low-throughput	These results suggest that changes in the plasma levels of Let-7e and miR-126 could represent early markers of metabolic dysfunction in children with MetS traits.	Micro-RNAs Let7e and 126 in Plasma as Markers of Metabolic Dysfunction in 10 to 12 Years Old Children	2015	-
microRNA	Homo sapiens	hsa-let-7f	MIMAT0000067	obesity	DOID:9970	5B81	adipose tissue	30597763	-	differential expression	qPCR	PCR	Low-throughput	This study provides experimental evidence of the possible correlation between AT miR-20b-miR-296-Let-7f with obesity and T2D, which might involve vascular endothelial growth factor and WNT-dependent pathways that are regulated by six different genes, suggesting a novel signaling pathway that could be important for understanding the mechanisms underlying the AT dysfunction associated with obesity …	miR-20b, miR-296, and Let-7f Expression in Human Adipose Tissue is Related to Obesity and Type 2 Diabetes	2019	-
microRNA	Homo sapiens	hsa-let-7f	MIMAT0000067	type 2 diabetes mellitus	DOID:9352	5A11	plasma	24937531	-	downregulation	qRT-PCR	PCR	Low-throughput	Quantitative RT-PCR validation confirmed the significant up-regulation of miR-326 (P = .004) and down-regulation of let-7a (P < .001) and let-7f (P = .003).	Plasma exosome microRNA profiling unravels a new potential modulator of adiponectin pathway in diabetes: effect of glycemic control	2014	-
microRNA	Homo sapiens	hsa-let-7f	MIMAT0000067	type 2 diabetes mellitus	DOID:9352	5A11	adipose tissue	30597763	-	upregulation	qPCR	PCR	Low-throughput	This study provides experimental evidence of the possible correlation between AT miR-20b-miR-296-Let-7f with obesity and T2D, which might involve vascular endothelial growth factor and WNT-dependent pathways that are regulated by six different genes, suggesting a novel signaling pathway that could be important for understanding the mechanisms underlying the AT dysfunction associated with obesity …	miR-20b, miR-296, and Let-7f Expression in Human Adipose Tissue is Related to Obesity and Type 2 Diabetes	2019	-
microRNA	Homo sapiens	hsa-let-7g	MIMAT0000414	metabolic syndrome	DOID:14221	5A44	serum	24093444	-	upregulation	qRT-PCR	PCR	Low-throughput	The circulating levels of let-7 g and miR-221 displayed a female-specific elevation in individuals with metabolic syndrome.	Circulating microRNAs have a sex-specific association with metabolic syndrome	2013	-
microRNA	Homo sapiens	hsa-let-7i-5p	MIMAT0000415	obesity	DOID:9970	5B81	adipose tissue	27345691	UCP1	downregulation	microarray /RT-qPCR/ Immunoblotting analysis	microarray;PCR;Immunoblotting	Low-throughput	These results suggest that the miRNAs Let-7i-5p participates in the recruitment and the function of brite adipocytes.	Let-7i-5p represses brite adipocyte function in mice and humans	2016	-
microRNA	Homo sapiens	hsa-miR-1	MIMAT0000416	hypertension	DOID:10763	BA00	peripheral blood	26358152	-	upregulation	RT-PCR	PCR	Low-throughput	Our data reveal that miR-1, miR-133a, miR-26b, miR-208b, miR-499, and miR-21 show distinct expression profiles in hypertensive patients relative to healthy individuals and they are associated with clinical indices of left ventricular hypertrophy in hypertensive patients.	Hypertrophic and antihypertrophic microRNA levels in peripheral blood mononuclear cells and their relationship to left ventricular hypertrophy in patients with essential hypertension	2015	-
microRNA	Homo sapiens	hsa-miR-1	MIMAT0000416	hypertension	DOID:10763	BA00	peripheral blood	24284386	-	upregulation	qRT-PCR	PCR	Low-throughput	Our data provide important evidence that VSMC-modulating microRNAs are closely related to essential hypertension in humans and they may represent potential therapeutic targets in essential hypertension.	Differential expression of vascular smooth muscle-modulating microRNAs in human peripheral blood mononuclear cells: novel targets in essential hypertension	2014	-
microRNA	Homo sapiens	hsa-miR-1	MIMAT0000416	hyperlipidemia	DOID:1168	5C80.1	umbilical vein endothelial cells	24792518	MLCK	association	real-time PCR/Western blotting	PCR;Immunoblotting	Low-throughput	This study demonstrated that the effect of miR1 on hyperlipidemia is mediated through down-regulation of MLCK and the ERK/p38 MAPK pathway.	MicroRNA1 modulates oxLDL-induced hyperlipidemia by down-regulating MLCK and ERK/p38 MAPK pathway	2014	-
microRNA	Homo sapiens	hsa-miR-100	MIMAT0000098	type 2 diabetes mellitus	DOID:9352	5A11	blood	26973292	IGFR/mTOR	downregulation	-	-	-	Our data provide the first evidence of an association of circulating miR-100 with obesity and diabetes.	Circulating and visceral adipose miR-100 is down-regulated in patients with obesity and Type 2 diabetes	2016	-
microRNA	Homo sapiens	hsa-miR-100	MIMAT0000098	hypertension	DOID:10763	BA00	-	28565784	TRB3	association	RT-PCR/luciferase report assays	PCR;Luciferase assay	Low-throughput	The study showed that the TRB3 gene polymorphism rs6186923 was able to affect the TRB3 gene by affecting the binding of miR-100, which indirectly caused the formation of hypertension left ventricular hypertrophy.	Molecular mechanisms in microRNA-mediated TRB3 gene and hypertension left ventricular hypertrophy	2017	-
microRNA	Homo sapiens	hsa-miR-100	MIMAT0000098	obesity	DOID:9970	5B81	blood	26973292	IGFR/mTOR	downregulation	-	-	-	Our data provide the first evidence of an association of circulating miR-100 with obesity and diabetes.	Circulating and visceral adipose miR-100 is down-regulated in patients with obesity and Type 2 diabetes	2016	-
microRNA	Homo sapiens	hsa-miR-101	MIMAT0000099	type 2 diabetes mellitus	DOID:9352	5A11	serum	25726255	-	upregulation	Illumina sequencing	sequencing	High-throughput	The present findings demonstrated that the circulating miR-101, miR-375 and miR-802 levels are significantly increased in T2D patients versus NGT subjects and they may become the new biomarkers for type 2 diabetes.	Identification of circulating miR-101, miR-375 and miR-802 as biomarkers for type 2 diabetes	2015	-
microRNA	Homo sapiens	hsa-miR-103	MIMAT0000101	obesity	DOID:9970	5B81	whole blood	24037889	-	downregulation	RT-PCR	PCR	Low-throughput	Obesity significantly reduced the expression of miRNA-21, miRNA-27b, and miRNA-103.	Effects of polycystic ovary syndrome (PCOS), sex hormones, and obesity on circulating miRNA-21, miRNA-27b, miRNA-103, and miRNA-155 expression	2013	-
microRNA	Homo sapiens	hsa-miR103	MIMAT0000101	type 2 diabetes mellitus	DOID:9352	5A11	liver	21654750	caveolin-1	upregulation	microarray/RT-qPCR	microarray	Low-throughput	These findings demonstrate the central importance of miR-103/107 to insulin sensitivity and identify a new target for the treatment of type 2 diabetes and obesity.	MicroRNAs 103 and 107 regulate insulin sensitivity	2011	-
microRNA	Homo sapiens	hsa-miR-103	MIMAT0000101	obesity	DOID:9970	5B81	adipose tissue	28329833	Thy1	association	qPCR/Luciferase reporter assays /Western blot	PCR;luciferase assay;Immunoblotting	Low-throughput	Our results reveal for the first time that Thy1 is a target of TBBPA. Furthermore, our data support the concept that Thy1 is a key marker targeted by environmental chemicals that promote adipogenesis and obesity.	Thy1 (CD90) Expression is Reduced by the Environmental Chemical Tetrabromobisphenol-A to Promote Adipogenesis Through Induction of microRNA-103	2017	-
microRNA	Homo sapiens	hsa-miR-103	MIMAT0000101	hyperlipidemia	DOID:1168	5C80.1	endothelial cells	29980665	lncWDR59	association	qPCR/Western blotting	PCR;Immunoblotting	Low-throughput	These data indicate that miR-103 programs ECs toward a maladapted phenotype through targeting of lncWDR59, which may promote atherosclerosis.	miR-103 promotes endothelial maladaptation by targeting lncWDR59	2018	GSE114805
microRNA	Homo sapiens	hsa-miR-103a	MIMAT0000101	obesity	DOID:9970	5B81	blood	28920467	-	differential expression	real-time qPCR	PCR	Low-throughput	Our findings support the need for further studies to determine whether such changes are consistent across different populations and whether the identified microRNAs may represent novel biomarkers to predict the susceptibility and progression of obesity-related disorders.	Association of subcutaneous and visceral fat with circulating microRNAs in a middle-aged Japanese population	2018	-
microRNA	Homo sapiens	hsa-miR-103a-2-5p	MIMAT0009196	hypertension	DOID:10763	BA00	aortic endothelial cells	28660007	PARP1	differential expression	microarray/luciferase reporter assays	microarray;PCR;Luciferase assay;Immunoblotting	Low-throughput	These findings highlight the role for PARP-1 in regulating oxidative DNA damage in hypertension and identify important new miRNA regulators of PARP-1 expression.	MicroRNAs Modulate Oxidative Stress in Hypertension through PARP-1 Regulation	2017	GSE95431
microRNA	Homo sapiens	hsa-miR-103b	MIMAT0007402	type 2 diabetes mellitus	DOID:9352	5A11	platelet	25820527	SFRP4	downregulation	qRT-PCR	PCR	Low-throughput	The results suggest that platelet-derived miR-103b could negatively regulate the expression of SFRP4 mRNA/protein in pre-DM2, indicating that miR-103b could be a novel biomarker for the early diagnosis of DM2.	Platelet-derived miR-103b as a novel biomarker for the early diagnosis of type 2 diabetes	2015	-
microRNA	Homo sapiens	hsa-miR-106b	MIMAT0000680	hypo-HDL cholesterolemia	DOID:1387	5C81.Z	whole blood	25415674	-	association	RNA-seq/qRT-PCR	sequencing;PCR	High-throughput	Taken together with existing evidence from mechanistic studies, the current results of our study support a relationship between the miR-17-92 family and lipid metabolism, which merits further study.	Association of plasma MiR-17-92 with dyslipidemia in patients with coronary artery disease	2014	-
microRNA	Homo sapiens	hsa-miR-107	MIMAT0000104	obesity	DOID:9970	5B81	adipose tissue	28329833	-	association	qPCR/Luciferase reporter assays /Western blot	PCR;luciferase assay;Immunoblotting	Low-throughput	Our results reveal for the first time that Thy1 is a target of TBBPA. Furthermore, our data support the concept that Thy1 is a key marker targeted by environmental chemicals that promote adipogenesis and obesity.	Thy1 (CD90) Expression is Reduced by the Environmental Chemical Tetrabromobisphenol-A to Promote Adipogenesis Through Induction of microRNA-103	2017	-
microRNA	Homo sapiens	hsa-miR-107	MIMAT0000104	obesity	DOID:9970	5B81	adipocyte	30261211	CDK6	upregulation	qPCR/Western blotting	PCR;Immunoblotting	Low-throughput	To conclude, our data suggests that miR-107 has distinct functional roles in preadipocytes and mature adipocytes; Its elevated expression at these different stages of adipocytes may on one hand dampen adipogenesis, and on the other, promote ectopic fatty acid accumulation and reduced glucose tolerance.	miR-107 inhibits CDK6 expression, differentiation, and lipid storage in human adipocytes	2019	-
microRNA	Homo sapiens	hsa-miR-10a	MIMAT0000253	hyperlipidemia	DOID:1168	5C80.1	serum	24928089	-	upregulation	microarray	microarray	Low-throughput	These data show a statistically significant correlation of the analyzed miRNA with increased lipids, specifically with α- and β-lipoproteins, and CRP and IL-1β levels in HL and/or HG sera, suggesting a contribution of these miRNAs to the atherosclerotic process.	Analysis of circulating microRNAs that are specifically increased in hyperlipidemic and/or hyperglycemic sera	2014	-
microRNA	Homo sapiens	hsa-miR-10a-5p	MIMAT0000253	hypertension	DOID:10763	BA00	-	30706734	-	downregulation	qRT-PCR	PCR	Low-throughput	Lower expression of miR-10a-5p, as the key role, is significantly related to the risk of EH and maybe as a potential biomolecule for EH.	A potential risk factor of essential hypertension in case-control study: MicroRNAs miR-10a-5p	2019	-
microRNA	Homo sapiens	hsa-miR-10b-5p	MIMAT0000254	obesity	DOID:9970	5B81	plasma	30651891	-	downregulation	RT-qPCR	PCR	Low-throughput	Our work showed that several circulating miRNAs are differentially represented in overweight/low-grade obesity children and adolescents. Although causal pathways cannot be firmly inferred, it is conceivable that circulating miRNAs may be new biomarkers of early childhood obesity.	Circulating microRNAs are associated with early childhood obesity: results of the I.Family Study	2019	-
microRNA	Homo sapiens	hsa-miR-10b-5p	MIMAT0000254	obesity	DOID:9970	5B81	adipose tissue	30423386	Apol6	downregulation	qPCR/luciferase reporter assay	PCR;luciferase assay	Low-throughput	These results indicate that miR-10b-5p may have a therapeutic significance for obesity and obesity-related cancers.	miR-10b-5p regulates 3T3-L1 cells differentiation by targeting Apol6	2019	-
microRNA	Homo sapiens	hsa-miR-122	MIMAT0000421	metabolic syndrome	DOID:14221	5A44	blood	27899485	-	association	qRT-PCR	PCR	Low-throughput	Circulating miR-122 is strongly associated with the risk of developing metabolic syndrome and type 2 diabetes in the general population.	Circulating MicroRNA-122 Is Associated With the Risk of New-Onset Metabolic Syndrome and Type 2 Diabetes	2017	-
microRNA	Homo sapiens	hsa-miR-122	MIMAT0000421	obesity	DOID:9970	5B81	plasma	28342299	-	association	qRT-PCR	PCR	Low-throughput	The findings provide evidence that circulating miRNAs play important roles in obesity and weight gain and suggest new targets for understanding the mechanisms of weight gain and developing weight loss intervention strategies.	Plasma MicroRNA signature predicting weight gain among Mexican-American women	2017	-
microRNA	Homo sapiens	hsa-miR-122	MIMAT0000421	obesity	DOID:9970	5B81	serum	27899485	-	association	qRT-PCR	PCR	Low-throughput	In conclusion, circulating miR-122 is strongly associated with the risk of developing metabolic syndrome and type 2 diabetes in the general population.	Circulating MicroRNA-122 Is Associated With the Risk of New-Onset Metabolic Syndrome and Type 2 Diabetes	2017	-
microRNA	Homo sapiens	hsa-miR-122	MIMAT0000421	obesity	DOID:9970	5B81	adipose tissue	29960868	PPAR-γ	upregulation	microarray/Northern blotting	microarray;Immunoblotting	Low-throughput	Our findings indicate that miR-122 is highly expressed in adipose tissue. The abundance of miR-122 affects PPAR-γ signalling and adipocytes differentiation in vitro and human adipose tissues. Higher miR-122 in VF may be associated with greater body weight loss after bariatric surgery.	MiR-122 marks the differences between subcutaneous and visceral adipose tissues and associates with the outcome of bariatric surgery	2018	-
microRNA	Homo sapiens	hsa-miR-122	MIMAT0000421	hypertension	DOID:10763	BA00	plasma	25837765	-	upregulation	qRT-PCR	PCR	Low-throughput	We report for the first time a plasma miRNA profile for WCH patients and demonstrate a novel link between miRNA and WCH. These findings may reveal crucial insights into the development of WCH.	Differential expression of hypertension-associated microRNAs in the plasma of patients with white coat hypertension	2015	-
microRNA	Homo sapiens	hsa-miR-122	MIMAT0000421	obesity	DOID:9970	5B81	serum	25515554	-	upregulation	microarray/RT-qPCR	microarray;PCR	Low-throughput	Elevated circulating miR-122 is positively associated with obesity and insulin resistance in young adults. These findings provide a better understanding regarding the role of miRNAs in adiposity and insulin sensitivity.	Elevated circulating microRNA-122 is associated with obesity and insulin resistance in young adults	2015	-
microRNA	Homo sapiens	hsa-miR-122	MIMAT0000421	obesity	DOID:9970	5B81	liver	27669236	-	downregulation	real-time qPCR	PCR	Low-throughput	Hepatic miR33b* expression was increased in MO compared to ModO and controls, whereas miR122 expression was decreased in the MO group compared to ModO.	miR33a/miR33b* and miR122 as Possible Contributors to Hepatic Lipid Metabolism in Obese Women with Nonalcoholic Fatty Liver Disease	2016	-
microRNA	Homo sapiens	hsa-miR-122	MIMAT0000421	obesity	DOID:9970	5B81	sperm	29896216	-	upregulation	RT-qPCR	PCR	Low-throughput	Our results showed that obese subjects have increased expressions of miR-155 and miR-122, two microRNAs that were previously related with inflammation and iron metabolism, respectively, at both the systemic and sperm levels.	miR-155 and miR-122 Expression of Spermatozoa in Obese Subjects	2018	-
microRNA	Homo sapiens	hsa-miR-122	MIMAT0000421	type 2 diabetes mellitus	DOID:9352	5A11	plasma	27899485	-	upregulation	qRT-PCR	PCR	Low-throughput	In conclusion, circulating miR-122 is strongly associated with the risk of developing metabolic syndrome and type 2 diabetes in the general population.	Circulating MicroRNA-122 Is Associated With the Risk of New-Onset Metabolic Syndrome and Type 2 Diabetes	2017	-
microRNA	Homo sapiens	hsa-miR-122	MIMAT0000421	hyperlipidemia	DOID:1168	5C80.1	hepatocyte	25855506	HCBP6	association	qPCR/luciferase reporter assay	PCR;Luciferase assay;knockdown	Low-throughput	Our results provide new evidence that miR-122-regulated HCBP6 functions as a sensor protein to maintain intrahepatocyte TG levels.	HCBP6 Modulates Triglyceride Homeostasis in Hepatocytes Via the SREBP1c/FASN Pathway	2015	-
microRNA	Homo sapiens	hsa-miR-122	MIMAT0000421	hyperlipidemia	DOID:1168	5C80.1	plasma	22587332	-	upregulation	real-time qPCR	PCR	Low-throughput	Our results suggest that increased plasma levels of miR-122 and miR-370 might be associated with the presence as well as the severity of CAD in hyperlipidemia patients.	Plasma levels of lipometabolism-related miR-122 and miR-370 are increased in patients with hyperlipidemia and associated with coronary artery disease	2012	-
microRNA	Homo sapiens	hsa-miR-122-5p	MIMAT0000421	metabolic syndrome	DOID:14221	5A44	blood	30771749	-	upregulation	-	-	-	The expression of miR-21-5p, miR-122-5p, and miR-146a-5p was significantly higher in subjects with MetS than those without MetS.	Associations of blood levels of trace elements and heavy metals with metabolic syndrome in Chinese male adults with microRNA as mediators involved	2019	-
microRNA	Homo sapiens	hsa-miR-122-5p	MIMAT0000421	type 2 diabetes mellitus	DOID:9352	5A11	serum	30835718	-	differential expression	qRT-PCR	PCR	Low-throughput	Serum miR-99b, miR-486-5p, miR-122-5p, and miR-20a were differentially expressed in patients with T2DM and DKD and should be evaluated further as potential biomarkers for DKD.	Evaluation of Serum microRNAs in Patients with Diabetic Kidney Disease: A Nested Case-Controlled Study and Bioinformatics Analysis	2019	-
microRNA	Homo sapiens	hsa-miR-124	MIMAT0000422	hypertension	DOID:10763	BA00	hepatocyte	19944075	NR3C2	association	qRT-PCR/luciferase reporter assays	PCR;Luciferase assay	Low-throughput	Our results demonstrate that by repressing the mineralocorticoid receptor gene NR3C2, miR-124 and miR-135a could participate in the regulation of renin-angiotensin-aldosterone system and thereby might be involved in blood pressure regulation.	MicroRNAs miR-124 and miR-135a are potential regulators of the mineralocorticoid receptor gene (NR3C2) expression	2010	-
microRNA	Homo sapiens	hsa-miR-1249	MIMAT0005901	type 2 diabetes mellitus	DOID:9352	5A11	plasma	27039347	-	differential expression	qRT-PCR	PCR	Low-throughput	Taken together, our results showed differentially expressed miRNAs in T2D and prediabetes. Plasma hsa-miR-1249, hsa-miR-320b, and hsa-miR-572 may serve as novel biomarkers for diagnosis and potential targets for the treatment for prediabetes and T2D.	Differential expression of microRNAs in plasma of patients with prediabetes and newly diagnosed type 2 diabetes	2016	-
microRNA	Homo sapiens	hsa-miR-124a	MIMAT0000422	type 2 diabetes mellitus	DOID:9352	5A11	islet	25408296	Mtpn/Foxa2	upregulation	qRT-PCR/luciferase reporter assays	PCR;luciferase assays	Low-throughput	We uncovered a major hyperexpression of miR-124a in T2D islets, whose silencing resulted in increased expression of target genes of major importance for beta cell function and whose overexpression impaired glucose-stimulated insulin secretion, leading to the hypothesis that an altered miR-124a expression may contribute to beta cell dysfunction in type 2 diabetes.	MicroRNA-124a is hyperexpressed in type 2 diabetic human pancreatic islets and negatively regulates insulin secretion	2015	-
microRNA	Homo sapiens	hsa-miR-125a	MIMAT0000443	obesity	DOID:9970	5B81	adipose tissue	24675842		downregulation	qRT-PCR	PCR	Low-throughput	Our findings indicate that microRNA-125a expression in adipose tissue adapts to IR and may play a role in the development of obesity in mice and obese subjects through uncoupled regulation of the expression of microRNA-125a and its targets.	Visceral Adipose MicroRNA 223 Is Upregulated in Human and Murine Obesity and Modulates the Inflammatory Phenotype of Macrophages	2014	-
microRNA	Homo sapiens	hsa-miR-125a-3p	MIMAT0004602	obesity	DOID:9970	5B81	adipose tissue	24901105	-	upregulation	microarray/RT-qPCR	microarray;PCR	Low-throughput	Our results support the involvement of miR-125a-3p in regulating the insulin signalling pathway and imply that increased miR- 125a-3p expression in omental adipose tissues may be a characteristic feature of insulin resistance in obese men.	MicroRNA-125a-3p expression in abdominal adipose tissues is associated with insulin signalling gene expressions in morbid obesity: observations in Taiwanese	2014	-
microRNA	Homo sapiens	hsa-miR-125a-5p	MIMAT0000443	hyperlipidemia	DOID:1168	5C80.1	serum	24928089	-	upregulation	microarray	microarray	Low-throughput	These data show a statistically significant correlation of the analyzed miRNA with increased lipids, specifically with α- and β-lipoproteins, and CRP and IL-1β levels in HL and/or HG sera, suggesting a contribution of these miRNAs to the atherosclerotic process.	Analysis of circulating microRNAs that are specifically increased in hyperlipidemic and/or hyperglycemic sera	2014	-
microRNA	Homo sapiens	hsa-miR-125a-5p	MIMAT0000443	obesity	DOID:9970	5B81	visceral adipose tissue	27480132	SIRT7	association	real-time qPCR	PCR	Low-throughput	We observed obesity-associated downregulation of SIRT1 and upregulation of SIRT7 mRNA levels that were not associated with the methylation status of their promoters. We found a negative correlation between mRNA levels of SIRT1 in VAT of obese individuals and SIRT7 in VAT of the normal-weight subjects and expression of the relevant miRNAs.	SIRT1 and SIRT7 expression in adipose tissues of obese and normal-weight individuals is regulated by microRNAs but not by methylation status	2016	-
microRNA	Homo sapiens	hsa-miR-125b	MIMAT0000423	type 2 diabetes mellitus	DOID:9352	5A11	peripheral blood	29285097	-	upregulation	RT-qPCR	PCR	Low-throughput	These results indicate that the alteration of miR-34a and miR-125b exists in patients with T2DM, which may be involved in the pathogenesis of T2DM, and could be a potential novel biomarker of T2DM.	miR-34a and miR-125b are upregulated in peripheral blood mononuclear cells from patients with type 2 diabetes mellitus	2017	-
microRNA	Homo sapiens	hsa-miR-125b	MIMAT0000423	type 2 diabetes mellitus	DOID:9352	5A11	liver	29319168	PIK3CD	upregulation	-	-	-	Together, these findings indicate that miR-125b inhibits insulin sensitivity by targeting PIK3CD in hepatocytes, supporting hepatic miR-125b, or PIK3CD are potential therapeutic target of insulin resistance.	Hepatic miR-125b inhibits insulin signaling pathway by targeting PIK3CD	2018	-
microRNA	Homo sapiens	hsa-miR-125b	MIMAT0000423	obesity	DOID:9970	5B81	plasma	28342299	-	association	qRT-PCR	PCR	Low-throughput	The findings provide evidence that circulating miRNAs play important roles in obesity and weight gain and suggest new targets for understanding the mechanisms of weight gain and developing weight loss intervention strategies.	Plasma MicroRNA signature predicting weight gain among Mexican-American women	2017	-
microRNA	Homo sapiens	hsa-miR-125b	MIMAT0000423	obesity	DOID:9970	5B81	blood	23396142	-	downregulation	microarray/RT-qPCR	microarray;PCR	Low-throughput	Circulating miRNAs are deregulated in severe obesity. Weight loss-induced changes in this profile and the study of in silico targets support this observation and suggest a potential mechanistic relevance.	Targeting the circulating microRNA signature of obesity	2013	-
microRNA	Homo sapiens	hsa-miR-125b-5p	MIMAT0000423	obesity	DOID:9970	5B81	visceral adipose tissue	27480132	SIRT7	association	real-time qPCR	PCR	Low-throughput	We observed obesity-associated downregulation of SIRT1 and upregulation of SIRT7 mRNA levels that were not associated with the methylation status of their promoters. We found a negative correlation between mRNA levels of SIRT1 in VAT of obese individuals and SIRT7 in VAT of the normal-weight subjects and expression of the relevant miRNAs.	SIRT1 and SIRT7 expression in adipose tissues of obese and normal-weight individuals is regulated by microRNAs but not by methylation status	2016	-
microRNA	Homo sapiens	hsa-miR-125b-5p	MIMAT0000423	obesity	DOID:9970	5B81	adipose tissue	27656399	-	downregulation	RT-qPCR/Western blotting	PCR;Immunoblotting	Low-throughput	Our results demonstrate that miR-125b-5p plays an important role in the repression of brite adipocyte function by modulating oxygen consumption and mitochondrial gene expression.	miR-125b affects mitochondrial biogenesis and impairs brite adipocyte formation and function	2016	GSE80816
microRNA	Homo sapiens	hsa-miR-125b-5p	MIMAT0000423	obesity	DOID:9970	5B81	adipocyte	27617174	MMP11	upregulation	qRT-PCR/luciferase reporter assay/Western blotting	PCR;luciferase assay;Immunoblotting	Low-throughput	Taken together, these data implicate that miR125b-5p can affect human adipogenesis via MMP11 and probably additional targets.	Regulation of human adipogenesis by miR125b-5p	2016	-
microRNA	Homo sapiens	hsa-miR-126	MIMAT0000445	metabolic syndrome	DOID:14221	5A44	plasma	26046362	-	association	qPCR	PCR	Low-throughput	These results suggest that changes in the plasma levels of Let-7e and miR-126 could represent early markers of metabolic dysfunction in children with MetS traits.	Micro-RNAs Let7e and 126 in Plasma as Markers of Metabolic Dysfunction in 10 to 12 Years Old Children	2015	-
microRNA	Homo sapiens	hsa-miR-126	MIMAT0000445	metabolic syndrome	DOID:14221	5A44	serum	24136779	-	association	qRT-PCR	PCR	Low-throughput	All these results suggested that the association between PA and MetS risk might partly depend on miR-126 and miR-197.	Associations between physical activity-related miRNAs and metabolic syndrome	2014	-
microRNA	Homo sapiens	hsa-miR-126	MIMAT0000445	obesity	DOID:9970	5B81	plasma	29607782	-	downregulation	RT-PCR	PCR	Low-throughput	Overweight and obesity, independent of other cardiometabolic risk factors, negatively influences circulating inflammation-related miRs. Dysregulation of circulating miRs may contribute mechanistically to the heightened inflammatory state associated with overweight and obesity.	Influence of Overweight and Obesity on Circulating Inflammation-Related microRNA	2018	-
microRNA	Homo sapiens	hsa-miR-126	MIMAT0000445	obesity	DOID:9970	5B81	visceral adipose tissue	26122028	Spred1	association	qRT-PCR/Western blotting	PCR;Immunoblotting	Low-throughput	These results indicate that obesity impacts on EV pro-angiogenic potential and may raise concerns about the use of adipose tissue-derived EVs in cell-based therapy in the obese setting.	Obesity reduces the pro-angiogenic potential of adipose tissue stem cell-derived extracellular vesicles (EVs) by impairing miR-126 content: impact on clinical applications	2016	-
microRNA	Homo sapiens	hsa-miR-126	MIMAT0000445	obesity	DOID:9970	5B81	subcutaneous adipose tissue	22688341	CCL2	downregulation	qRT-PCR/luciferase reporter assay/Western blotting	PCR;luciferase assay;Immunoblotting	Low-throughput	Taken together, our data suggest that miRNAs may be important regulators of adipose inflammation through their effects on CCL2 release from human adipocytes and macrophages.	Adipose tissue microRNAs as regulators of CCL2 production in human obesity	2012	GSE25402
microRNA	Homo sapiens	hsa-miR-126	MIMAT0000445	obesity	DOID:9970	5B81	serum	30472037	-	association	-	-	-	Combination of exercise and diet control can effectively improve glycolipid metabolism of obese adolescents, and thus their microvascular endothelial function, which might be related to changes in serum miRNA-126.	Improvement of microvascular endothelial dysfunction induced by exercise and diet is associated with microRNA-126 in obese adolescents	2019	-
microRNA	Homo sapiens	hsa-miR-126	MIMAT0000445	type 2 diabetes mellitus	DOID:9352	5A11	plasma	25986735	-	downregulation	-	-	-	In conclusion, our results support the notion that the circulating miR-126 can be developed into a non-invasive and rapid diagnostic tool for the prediction of susceptible individuals to developing T2DM.	Circulating miR-126 is a potential biomarker to predict the onset of type 2 diabetes mellitus in susceptible individuals	2015	-
microRNA	Homo sapiens	hsa-miR-126	MIMAT0000445	type 2 diabetes mellitus	DOID:9352	5A11	serum	24927146	-	downregulation	qPCR	PCR	Low-throughput	These results encourage the use of serum miR-126 as a biomarker for pre-diabetes and diabetes mellitus, as well as therapeutic response.	The role of circulating microRNA-126 (miR-126): a novel biomarker for screening prediabetes and newly diagnosed type 2 diabetes mellitus	2014	-
microRNA	Homo sapiens	hsa-miR-126	MIMAT0000445	type 2 diabetes mellitus	DOID:9352	5A11	peripheral blood	27321479	-	downregulation	qRT-PCR	PCR	Low-throughput	Circulating miR-126 may serve as a biomarker for predicting patients with T2D and diabetic CAD.	Circulating endothelium-enriched microRNA-126 as a potential biomarker for coronary artery disease in type 2 diabetes mellitus patients	2017	-
microRNA	Homo sapiens	hsa-miR-126	MIMAT0000445	type 2 diabetes mellitus	DOID:9352	5A11	circulating endothelial progenitor cells	22525256	Spred-1	downregulation	microarray/RT-qPCR	microarray;PCR	Low-throughput	This study provides the first evidence that miR-126 is downregulated in EPCs from diabetic patients, and impairs EPCs-mediated function via its target, Spred-1, and through Ras/ERK/VEGF and PI3K/Akt/eNOS signal pathway.	Downregulation of microRNA-126 in endothelial progenitor cells from diabetes patients, impairs their functional properties, via target gene Spred-1	2012	-
microRNA	Homo sapiens	hsa-miR-126	MIMAT0000445	hypertension	DOID:10763	BA00	peripheral blood	24794206	-	downregulation	RT-PCR	PCR	Low-throughput	Our data reveal that miR-9 and miR-126 are closely related to essential hypertension in humans, as they show a distinct expression profile in hypertensive patients relative to healthy individuals, and they are associated with clinical prognostic indices of hypertensive target-organ damage in hypertensive patients.	MicroRNA-9 and microRNA-126 expression levels in patients with essential hypertension: potential markers of target-organ damage	2014	-
microRNA	Homo sapiens	hsa-miR-126	MIMAT0000445	hypertension	DOID:10763	BA00	plasma	29615793	-	downregulation	RT-qPCR	PCR	Low-throughput	These results suggest that hypertension, independent of other cardiometabolic risk factors, adversely affects the circulating profile of a subset of vascular-related miRNAs that have been link to CVD risk and development.	Association between hypertension and circulating vascular-related microRNAs	2018	-
microRNA	Homo sapiens	hsa-miR-126	MIMAT0000445	hypertension	DOID:10763	BA00	serum	29393351	-	upregulation	gene knockdown	gene knockdown	Low-throughput	The increased level of miR‑126 expression in hypertensive patients may be due to a compensatory mechanism.	Preliminary study of microRNA-126 as a novel therapeutic target for primary hypertension	2018	-
microRNA	Homo sapiens	hsa-miR-126	MIMAT0000445	obesity	DOID:9970	5B81	plasma	30248300	-	upregulation	-	-	-	These findings indicate that acute aerobic exercise elicits a higher elevation in plasma level of inflammatory ci-miRNAs in obese than normal-weight individuals, irrespective of cardiorespiratory fitness and indicator of metabolic syndrome (HOMA-IR).	Circulating microRNAs are upregulated following acute aerobic exercise in obese individuals	2018	-
microRNA	Homo sapiens	hsa-miR-126	MIMAT0000445	obesity	DOID:9970	5B81	plasma	30383229	-	differential expression	microarray/RT-qPCR	microarray;PCR	Low-throughput	Our study has provided evidence that the circulating miRNAs associated with various disorders are dysregulated in women who are obese. We also found that seven of these miRNAs showed levels comparable to those in lean controls after acute weight loss in women who are obese.	Acute Weight Loss Restores Dysregulated Circulating MicroRNAs in Individuals Who Are Obese	2019	-
microRNA	Homo sapiens	hsa-miR-126	MIMAT0000445	type 2 diabetes mellitus	DOID:9352	5A11	platelet	27975100	P2RY12/SELP	downregulation	RT-qPCR	PCR	Low-throughput	Overall, miR-223, miR-26b, miR-126 and miR-140 are expressed at a lower level in platelets and MKs in DM2 causing upregulation of P2RY12 and SELP mRNAs that may contribute to adverse platelet function.	Hyperglycaemia suppresses microRNA expression in platelets to increase P2RY12 and SELP levels in type 2 diabetes mellitus	2017	-
microRNA	Homo sapiens	hsa-miR-126	MIMAT0000445	type 2 diabetes mellitus	DOID:9352	5A11	serum	27118517	-	downregulation	qRT-PCR	PCR	Low-throughput	Serum microRNA-126 expression could be a good marker for diagnosis of IGT and T2DM as well as for monitoring the outcomes of such disease.	Role of MicroRNA 126 in screening, diagnosis, and prognosis of diabetic patients in Egypt	2016	-
microRNA	Homo sapiens	hsa-miR-126	MIMAT0000445	type 2 diabetes mellitus	DOID:9352	5A11	peripheral blood	24455723	-	downregulation	qRT-PCR	PCR	Low-throughput	Notably, miR-126 is the only miRNA that showed significantly reduced expression in susceptible individuals and T2DM patients compared to normal individuals, suggesting that miR-126 in circulation may serve as a potential biomarker for early identification of susceptible individuals to T2DM.	Plasma miR-126 is a potential biomarker for early prediction of type 2 diabetes mellitus in susceptible individuals	2013	-
microRNA	Homo sapiens	hsa-miR-126	MIMAT0000445	type 2 diabetes mellitus	DOID:9352	5A11	plasma	20651284	-	downregulation	qPCR	PCR	Low-throughput	We reveal a plasma miRNA signature for DM that includes loss of endothelial miR-126. These findings might explain the impaired peripheral angiogenic signaling in patients with DM.	Plasma microRNA profiling reveals loss of endothelial miR-126 and other microRNAs in type 2 diabetes	2010	-
microRNA	Homo sapiens	hsa-miR-126	MIMAT0000445	hypertension	DOID:10763	BA00	renal cortex	22042811	-	differential expression	microarray/qRT-PCR/luciferase assays	microarray;PCR;Luciferase assay	Low-throughput	The observed downregulation of 2 miRNAs in hypertension could explain the elevation in intrarenal renin mRNA. Renin, CD36, and other mRNAs, as well as miRNAs and associated pathways identified in the present study, provide novel insights into hypertension etiology.	Gene expression profiling reveals renin mRNA overexpression in human hypertensive kidneys and a role for microRNAs	2011	GSE28260
microRNA	Homo sapiens	hsa-miR-126	MIMAT0000445	hypo-HDL cholesterolemia	DOID:1387	5C81.Z	endothelial cells	24958738	-	downregulation	RT-PCR	PCR	Low-throughput	HDL-induced expression of miR-126, miR-21 and miR-222 was significantly reduced in ECs incubated with HDLNYHA when compared to HDLHealthy.	Exercise training improves high-density lipoprotein-mediated transcription of proangiogenic microRNA in endothelial cells	2015	-
microRNA	Homo sapiens	hsa-miR-126-3p	MIMAT0000445	type 2 diabetes mellitus	DOID:9352	5A11	plasma	30461200	-	differential expression	microarray/RT-qPCR	array;PCR	Low-throughput	Our findings suggest that genetic polymorphisms of TGFBRAP1 may contribute to the genetic susceptibility of T2DM by mediating diabetes-related miRNA expression.	The variant at TGFBRAP1 is significantly associated with type 2 diabetes mellitus and affects diabetes-related miRNA expression	2019	-
microRNA	Homo sapiens	hsa-miR-1275	MIMAT0005929	obesity	DOID:9970	5B81	adipocyte	28901460	NF‑κB	downregulation	RT-qPCR/luciferase reporter assays	PCR;luciferase assay	Low-throughput	These results indicated that inflammatory factors could regulate miR‑1275 transcription through NF‑κB and influencing miR‑1275 effects on obesity.	Tumor necrosis factor‑α and interleukin‑6 suppress microRNA‑1275 transcription in human adipocytes through nuclear factor‑κB	2017	-
microRNA	Homo sapiens	hsa-miR-1275	MIMAT0005929	obesity	DOID:9970	5B81	visceral adipose tissue	27154547	ELK1	downregulation	qRT-PCR/luciferase reporter assay/Western blotting	PCR;luciferase assay;Immunoblotting	Low-throughput	These results suggest that miR-1275 could play a future role in the management of obesity, as a novel therapeutic target or biomarker.	miR-1275 inhibits adipogenesis via ELK1 and its expression decreases in obese subjects	2016	-
microRNA	Homo sapiens	hsa-miR-127-5p	MIMAT0004604	obesity	DOID:9970	5B81	serum	27532680	NEFA	association	qRT-PCR/Western blotting	PCR;Immunoblotting	Low-throughput	Our experiments implicate circulating NEFA in obesity in suppressing muscle protein metabolism, and establish impaired β-F1-ATPase translation as an important consequence of obesity.	Prolonged Exposure of Primary Human Muscle Cells to Plasma Fatty Acids Associated with Obese Phenotype Induces Persistent Suppression of Muscle Mitochondrial ATP Synthase β Subunit	2016	-
microRNA	Homo sapiens	hsa-miR-128	MIMAT0000424	type 2 diabetes mellitus	DOID:9352	5A11	serum	26020947	-	differential expression	qRT-PCR	PCR	Low-throughput	Our findings imply directionality towards biomarker potential of miRNAs in the prevention/diagnosis/treatment outcomes of diabetes.	Circulating MiRNAs of 'Asian Indian Phenotype' Identified in Subjects with Impaired Glucose Tolerance and Patients with Type 2 Diabetes	2015	-
microRNA	Homo sapiens	hsa-miR-1283	MIMAT0005799	hypertension	DOID:10763	BA00	peripheral blood	26149214	ATF1	association	real-time PCR/PCR-RLFP/Luciferase reporter assay/ELISA detection	PCR;Luciferase assay;Immunoblotting	Low-throughput	These results suggested that rs11169571 of ATF1 gene may be associated with EH, and the SNP-modified posttranscriptional gene regulation by miRNAs could be a potentially pathogenetic mechanism of EH.	The human ATF1 rs11169571 polymorphism increases essential hypertension risk through modifying miRNA binding	2015	-
microRNA	Homo sapiens	hsa-miR-129-5p	MIMAT0000242	hyperlipidemia	DOID:1168	5C80.1	peripheral blood	29674246	-	upregulation	microarray/RT-qPCR	microarray;PCR	Low-throughput	This is the first study of miRNA expression analysis of human PBMCs during postprandial hypertriglyceridemia and offers insight into new potential mechanisms by which dietary SFAs influence health or disease.	A microRNA expression signature of the postprandial state in response to a high-saturated-fat challenge	2018	-
microRNA	Homo sapiens	hsa-miR-130	MIMAT0000425	obesity	DOID:9970	5B81	plasma	30309709		upregulation	RT-PCR/Immunoassy analysis	PCR;Immunoblotting	Low-throughput	Circulating miRNAs showed significant association with plasma levels of adipokines; adiponectin, leptin, and L/A ratios in adolescents with severe obesity. The study provides that regulation of miRNAs expression is associated with adipokines, and other related MS metabolic factors.	Circulating microRNAs and adipokines as markers of metabolic syndrome in adolescents with obesity	2018	-
microRNA	Homo sapiens	hsa-miR-130a	MIMAT0000425	type 2 diabetes mellitus	DOID:9352	5A11	peripheral blood	25999017	MAP3K12	downregulation	real-time PCR/luciferase reporter assays	PCR;luciferase assays	Low-throughput	Downregulation of miR-130a may underlie endothelial dysfunction in diabetes through the activation of JNK signal pathway.	MicroRNA-130a Targets MAP3K12 to Modulate Diabetic Endothelial Progenitor Cell Function	2015	-
microRNA	Homo sapiens	hsa-miR-130a	MIMAT0000425	hypertension	DOID:10763	BA00	blood	23032062	-	differential expression	microarray/RT-qPCR	microarray;PCR	Low-throughput	Significant dysregulation of seven candidate microRNAs has been found to be associated with risks involved in the manifestation of metabolic syndrome.	Circulating miRNA profiles in patients with metabolic syndrome	2012	-
microRNA	Homo sapiens	hsa-miR-130a	MIMAT0000425	type 2 diabetes mellitus	DOID:9352	5A11	peripheral blood	26692941	PPARγ	downregulation	microarray/RT-qPCR	array;PCR	Low-throughput	In conclusion, microRNA-130a is decreased in Uygur patients with T2DM and it may play a role in T2DM through targeting PPARγ.	MicroRNA-130a expression is decreased in Xinjiang Uygur patients with type 2 diabetes mellitus	2015	-
microRNA	Homo sapiens	hsa-miR-130a	MIMAT0000425	obesity	DOID:9970	5B81	adipose tissue	21135128	PPARγ	downregulation	RT-qPCR/Western blotting	PCR;Immunoblotting	Low-throughput	Our findings reveal that miR-130 reduces adipogenesis by repressing PPARγ biosynthesis and suggest that perturbations in this regulation is linked to human obesity.	miR-130 suppresses adipogenesis by inhibiting peroxisome proliferator-activated receptor gamma expression	2011	-
microRNA	Homo sapiens	hsa-miR-130a-3p	MIMAT0000425	obesity	DOID:9970	5B81	serum	28638270	-	downregulation	qRT-PCR	PCR	Low-throughput	Our results support the clinical application of biomarkers in diagnosing early stage MetS, which will enable attenuation of disease progression before onset of irreversible complications.	Existence of a Strong Correlation of Biomarkers and miRNA in Females with Metabolic Syndrome and Obesity in a Population of West Virginia	2017	-
microRNA	Homo sapiens	hsa-miR-130a-3p	MIMAT0000425	type 2 diabetes mellitus	DOID:9352	5A11	serum	28638270	-	downregulation	qRT-PCR	PCR	Low-throughput	Our results support the clinical application of biomarkers in diagnosing early stage MetS, which will enable attenuation of disease progression before onset of irreversible complications.	Existence of a Strong Correlation of Biomarkers and miRNA in Females with Metabolic Syndrome and Obesity in a Population of West Virginia	2017	-
microRNA	Homo sapiens	hsa-miR-130a-3p	MIMAT0000425	type 2 diabetes mellitus	DOID:9352	5A11	islet	28332581	PDHA1/GCK	upregulation	real-time qPCR	PCR	Low-throughput	The data further strengthen the wide-ranging influence of microRNAs in pancreatic beta cell function, and hence their potential as therapeutic targets in type-2 diabetes.	Elevated miR-130a/miR130b/miR-152 expression reduces intracellular ATP levels in the pancreatic beta cell	2017	-
microRNA	Homo sapiens	hsa-miR-130b	MIMAT0000691	obesity	DOID:9970	5B81	adipose tissue	21135128	PPARγ	downregulation	RT-qPCR/Western blotting	PCR;Immunoblotting	Low-throughput	Our findings reveal that miR-130 reduces adipogenesis by repressing PPARγ biosynthesis and suggest that perturbations in this regulation is linked to human obesity.	miR-130 suppresses adipogenesis by inhibiting peroxisome proliferator-activated receptor gamma expression	2011	-
microRNA	Homo sapiens	hsa-miR-130b	MIMAT0000691	metabolic syndrome	DOID:14221	5A44	serum	23868745	PGC-1α	association	qRT-PCR/luciferase reporter assay/Western blotting	PCR;luciferase assay;Immunoblotting	Low-throughput	Circulating miR-130b reflects the degree of obesity and could serve as a potential biomarker for hypertriacylglycerolaemia and metabolic syndrome.	Circulating miR-130b mediates metabolic crosstalk between fat and muscle in overweight/obesity	2013	-
microRNA	Homo sapiens	hsa-miR-130b	MIMAT0000691	obesity	DOID:9970	5B81	serum	23868745	PPARGC1A	upregulation	qRT-PCR/luciferase reporter assay/Western blotting	PCR;luciferase assay;Immunoblotting	Low-throughput	Circulating miR-130b reflects the degree of obesity and could serve as a potential biomarker for hypertriacylglycerolaemia and metabolic syndrome. Circulating miR-130b could function as a metabolic mediator for adipose-muscle crosstalk and might be involved in the pathogenesis of obesity-associated metabolic diseases.	Circulating miR-130b mediates metabolic crosstalk between fat and muscle in overweight/obesity	2013	-
microRNA	Homo sapiens	hsa-miR-130b	MIMAT0000691	obesity	DOID:9970	5B81	plasma	26211628	-	downregulation	qRT-PCR	PCR	Low-throughput	In HF patients, the presence of obesity is associated with a differential expression of selected miRs and the miR-221/-130b ratio had significant correlations with adiposity parameters.	Circulating microRNAs in obese and lean heart failure patients: A case-control study with computational target prediction analysis	2015	-
microRNA	Homo sapiens	hsa-miR-130b	MIMAT0000691	type 2 diabetes mellitus	DOID:9352	5A11	serum	25952368	-	downregulation	real-time qPCR	PCR	Low-throughput	Our findings suggest that serum miR-130b may be a new biomarker for the early diagnosis of DN in T2DM. Circulating miR-130b may possibly be involved in the pathological mechanism of DN, such as lipid metabolic disorders, oxidative stress, extracellular matrix deposition and renal fibrosis.	The changes in miR-130b levels in human serum and the correlation with the severity of diabetic nephropathy	2015	-
microRNA	Homo sapiens	hsa-miR-130b	MIMAT0000691	obesity	DOID:9970	5B81	plasma	28342299	-	association	qRT-PCR	PCR	Low-throughput	The findings provide evidence that circulating miRNAs play important roles in obesity and weight gain and suggest new targets for understanding the mechanisms of weight gain and developing weight loss intervention strategies.	Plasma MicroRNA signature predicting weight gain among Mexican-American women	2017	-
microRNA	Homo sapiens	hsa-miR-130b	MIMAT0000691	obesity	DOID:9970	5B81	plasma	30248300	-	upregulation	-	-	-	These findings indicate that acute aerobic exercise elicits a higher elevation in plasma level of inflammatory ci-miRNAs in obese than normal-weight individuals, irrespective of cardiorespiratory fitness and indicator of metabolic syndrome (HOMA-IR).	Circulating microRNAs are upregulated following acute aerobic exercise in obese individuals	2018	-
microRNA	Homo sapiens	hsa-miR-130b	MIMAT0000691	obesity	DOID:9970	5B81	blood	23396142	-	downregulation	microarray/RT-qPCR	microarray;PCR	Low-throughput	Circulating miRNAs are deregulated in severe obesity. Weight loss-induced changes in this profile and the study of in silico targets support this observation and suggest a potential mechanistic relevance.	Targeting the circulating microRNA signature of obesity	2013	-
microRNA	Homo sapiens	hsa-miR-130b	MIMAT0000691	obesity	DOID:9970	5B81	plasma	23928666	-	upregulation	RT-PCR	PCR	Low-throughput	This study provides the first evidence that circulating miRNAs are deregulated in prepubertal obese children. Thus, the very early detection of an abnormal circulating miRNA profile may be a promising strategy to identify obese children who may suffer from metabolic abnormalities.	Changes in circulating microRNAs are associated with childhood obesity	2013	-
microRNA	Homo sapiens	hsa-miR-130b-3p	MIMAT0000691	type 2 diabetes mellitus	DOID:9352	5A11	serum	26020947	-	differential expression	qRT-PCR	PCR	Low-throughput	Our findings imply directionality towards biomarker potential of miRNAs in the prevention/diagnosis/treatment outcomes of diabetes.	Circulating MiRNAs of 'Asian Indian Phenotype' Identified in Subjects with Impaired Glucose Tolerance and Patients with Type 2 Diabetes	2015	-
microRNA	Homo sapiens	hsa-miR-130b-3p	MIMAT0000691	type 2 diabetes mellitus	DOID:9352	5A11	islet	28332581	PDHA1/GCK	upregulation	real-time qPCR	PCR	Low-throughput	The data further strengthen the wide-ranging influence of microRNAs in pancreatic beta cell function, and hence their potential as therapeutic targets in type-2 diabetes.	Elevated miR-130a/miR130b/miR-152 expression reduces intracellular ATP levels in the pancreatic beta cell	2017	-
microRNA	Homo sapiens	hsa-miR-132	MIMAT0000426	type 2 diabetes mellitus	DOID:9352	5A11	islet	26218441	GLP-1	upregulation	real-time qPCR	PCR	Low-throughput	GLP-1 increases the expression of miRNAs 132 and 212 via a cAMP/protein kinase A-dependent pathway in pancreatic β-cells. Overexpression of miR-132 or miR-212 enhances glucose and GLP-1-stimulated insulin secretion.	Induction of miR-132 and miR-212 Expression by Glucagon-Like Peptide 1 (GLP-1) in Rodent and Human Pancreatic β-Cells	2015	-
microRNA	Homo sapiens	hsa-miR-132	MIMAT0000426	type 2 diabetes mellitus	DOID:9352	5A11	islet	30672723	-	association	-	-	-	In conclusion, we identified a post-transcriptional role for miR-132 in insulin secretion, and demonstrated that systemic antagomir-132 treatment in mice can be used to improve insulin secretion and reduce blood glucose in vivo.	In Vivo Silencing of MicroRNA-132 Reduces Blood Glucose and Improves Insulin Secretion	2019	-
microRNA	Homo sapiens	hsa-miR-132	MIMAT0000426	hypertension	DOID:10763	BA00	heart	23712358	-	upregulation	microarray/RT-qPCR	microarray;PCR	Low-throughput	Taken together, these data suggest that miR-132 and miR-212 are involved in AngII induced hypertension, providing a new perspective in hypertensive disease mechanisms.	Angiotensin II regulates microRNA-132/-212 in hypertensive rats and humans	2013	-
microRNA	Homo sapiens	hsa-miR-132	MIMAT0000426	obesity	DOID:9970	5B81	omental adipose tissue	21367929	-	differential expression	microarray/RT-qPCR	microarray;PCR	Low-throughput	This study demonstrates that candidate metabolic miRNAs are altered in adipose tissue and circulation of the obese. Omental fat tissue and systemic miRNA levels reflect components of the metabolic syndrome, highlighting their potential as novel biomarkers for this complex syndrome.	Differential miRNA expression in omental adipose tissue and in the circulation of obese patients identifies novel metabolic biomarkers	2011	-
microRNA	Homo sapiens	hsa-miR-133	MIMAT0000427	hypertension	DOID:10763	BA00	peripheral blood	24284386	-	downregulation	qRT-PCR	PCR	Low-throughput	Our data provide important evidence that VSMC-modulating microRNAs are closely related to essential hypertension in humans and they may represent potential therapeutic targets in essential hypertension.	Differential expression of vascular smooth muscle-modulating microRNAs in human peripheral blood mononuclear cells: novel targets in essential hypertension	2014	-
microRNA	Homo sapiens	hsa-miR-133a	MIMAT0000427	hypertension	DOID:10763	BA00	peripheral blood	26358152	-	downregulation	RT-PCR	PCR	Low-throughput	Our data reveal that miR-1, miR-133a, miR-26b, miR-208b, miR-499, and miR-21 show distinct expression profiles in hypertensive patients relative to healthy individuals and they are associated with clinical indices of left ventricular hypertrophy in hypertensive patients.	Hypertrophic and antihypertrophic microRNA levels in peripheral blood mononuclear cells and their relationship to left ventricular hypertrophy in patients with essential hypertension	2015	-
microRNA	Homo sapiens	hsa-miR-133a	MIMAT0000427	hypertension	DOID:10763	BA00	peripheral blood	26984682	-	differential expression	RT-PCR	PCR	Low-throughput	Our findings provide new perspectives on the development of a new generation of biomarkers for the better monitoring of end-organ damage in hypertension.	Comparative microRNA profiling in relation to urinary albumin excretion in newly diagnosed hypertensive patients	2016	-
microRNA	Homo sapiens	hsa-miR-135a	MIMAT0000428	hypertension	DOID:10763	BA00	hepatocyte	19944075	NR3C2	association	qRT-PCR/luciferase reporter assays	PCR;Luciferase assay	Low-throughput	Our results demonstrate that by repressing the mineralocorticoid receptor gene NR3C2, miR-124 and miR-135a could participate in the regulation of renin-angiotensin-aldosterone system and thereby might be involved in blood pressure regulation.	MicroRNAs miR-124 and miR-135a are potential regulators of the mineralocorticoid receptor gene (NR3C2) expression	2010	-
microRNA	Homo sapiens	hsa-miR-138	MIMAT0000430	obesity	DOID:9970	5B81	serum	25912229	-	downregulation	real-time qPCR	PCR	Low-throughput	Our study is one of the pioneer studies showing the differences in peripheral miRNA level in obesity, T2DM and T2DM combined with obesity. The study results suggest the potential utility of miRNAs in the prediction for obesity and T2DM.	Profiling peripheral microRNAs in obesity and type 2 diabetes mellitus	2015	-
microRNA	Homo sapiens	hsa-miR-138	MIMAT0000430	obesity	DOID:9970	5B81	adipose tissue	20486779	EID-1	downregulation	luciferase assays	luciferase assay	Low-throughput	Taken together, this study shows that miR-138 plays a negative role in adipogenic differentiation and sheds light on the role of miRNAs during differentiation of hAD-MSCs toward adipocytes.	MicroRNA hsa-miR-138 inhibits adipogenic differentiation of human adipose tissue-derived mesenchymal stem cells through adenovirus EID-1	2011	-
microRNA	Homo sapiens	hsa-miR-138	MIMAT0000430	obesity	DOID:9970	5B81	serum	24204780	-	downregulation	RT-qPCR	PCR	Low-throughput	This study is the first to show a panel of serum miRNAs for obesity, and compare them with miRNAs identified in serum for diabetes and obesity with diabetes. Our results support the use of some miRNAs extracted from serum samples as potential predictive tools for obesity and type 2 diabetes.	Serum circulating microRNA profiling for identification of potential type 2 diabetes and obesity biomarkers	2013	-
microRNA	Homo sapiens	hsa-miR-140	MIMAT0000431	type 2 diabetes mellitus	DOID:9352	5A11	platelet	27975100	P2RY12/SELP	downregulation	RT-qPCR	PCR	Low-throughput	Overall, miR-223, miR-26b, miR-126 and miR-140 are expressed at a lower level in platelets and MKs in DM2 causing upregulation of P2RY12 and SELP mRNAs that may contribute to adverse platelet function.	Hyperglycaemia suppresses microRNA expression in platelets to increase P2RY12 and SELP levels in type 2 diabetes mellitus	2017	-
microRNA	Homo sapiens	hsa-miR-140-5p	MIMAT0000431	obesity	DOID:9970	5B81	blood	23396142	-	upregulation	microarray/RT-qPCR	microarray;PCR	Low-throughput	Circulating miRNAs are deregulated in severe obesity. Weight loss-induced changes in this profile and the study of in silico targets support this observation and suggest a potential mechanistic relevance.	Targeting the circulating microRNA signature of obesity	2013	-
microRNA	Homo sapiens	hsa-miR-140-5p	MIMAT0000431	obesity	DOID:9970	5B81	plasma	30309709		upregulation	RT-PCR/Immunoassy analysis	PCR;Immunoblotting	Low-throughput	Circulating miRNAs showed significant association with plasma levels of adipokines; adiponectin, leptin, and L/A ratios in adolescents with severe obesity. The study provides that regulation of miRNAs expression is associated with adipokines, and other related MS metabolic factors.	Circulating microRNAs and adipokines as markers of metabolic syndrome in adolescents with obesity	2018	-
microRNA	Homo sapiens	hsa-miR-141	MIMAT0000432	obesity	DOID:9970	5B81	visceral adipose tissue	22537031	YWHAG	association	luciferase assays	luciferase assays	Low-throughput	Both RAB11A and YWHAG proteins are involved in glucose homeostasis; YWHAG is also involved in lipid metabolism. Hence, the identified miRNA/protein target pairs are potential players in the obese phenotype.	miRNA and protein expression profiles of visceral adipose tissue reveal miR-141/YWHAG and miR-520e/RAB11A as two potential miRNA/protein target pairs associated with severe obesity	2012	-
microRNA	Homo sapiens	hsa-miR-141	MIMAT0000432	type 2 diabetes mellitus	DOID:9352	5A11	-	29620270	FOXA2	upregulation	RT-qPCR/luciferase reporter assays	PCR;luciferase assays	Low-throughput	In conclusion, the results of the present study indicate that the pioglitazone/miR‑141/FOXA2 axis may represent a promising target mechanism for T2D treatment.	Pioglitazone/microRNA‑141/FOXA2: A novel axis in pancreatic β‑cells proliferation and insulin secretion	2018	-
microRNA	Homo sapiens	hsa-miR-142	MIMAT0000434	obesity	DOID:9970	5B81	plasma	28342299	-	association	qRT-PCR	PCR	Low-throughput	The findings provide evidence that circulating miRNAs play important roles in obesity and weight gain and suggest new targets for understanding the mechanisms of weight gain and developing weight loss intervention strategies.	Plasma MicroRNA signature predicting weight gain among Mexican-American women	2017	-
microRNA	Homo sapiens	hsa-miR-142-3p	MIMAT0000434	obesity	DOID:9970	5B81	blood	23396142	-	upregulation	microarray/RT-qPCR	microarray;PCR	Low-throughput	Circulating miRNAs are deregulated in severe obesity. Weight loss-induced changes in this profile and the study of in silico targets support this observation and suggest a potential mechanistic relevance.	Targeting the circulating microRNA signature of obesity	2013	-
microRNA	Homo sapiens	hsa-miR-142-3p	MIMAT0000434	obesity	DOID:9970	5B81	plasma	30309709		upregulation	RT-PCR/Immunoassy analysis	PCR;Immunoblotting	Low-throughput	Circulating miRNAs showed significant association with plasma levels of adipokines; adiponectin, leptin, and L/A ratios in adolescents with severe obesity. The study provides that regulation of miRNAs expression is associated with adipokines, and other related MS metabolic factors.	Circulating microRNAs and adipokines as markers of metabolic syndrome in adolescents with obesity	2018	-
microRNA	Homo sapiens	hsa-miR-142-3p	MIMAT0000434	obesity	DOID:9970	5B81	plasma	23928666	-	upregulation	RT-PCR	PCR	Low-throughput	This study provides the first evidence that circulating miRNAs are deregulated in prepubertal obese children. Thus, the very early detection of an abnormal circulating miRNA profile may be a promising strategy to identify obese children who may suffer from metabolic abnormalities.	Changes in circulating microRNAs are associated with childhood obesity	2013	-
microRNA	Homo sapiens	hsa-miR-142-3p	MIMAT0000434	type 2 diabetes mellitus	DOID:9352	5A11	plasma	29643835	-	downregulation	qRT-PCR	PCR	Low-throughput	let-7b, miR-142, miR-144, and miR-29a in plasma may be important markers of neuroendocrine stress response and may play a role in the pathogenesis of T2DM and IR.	Identification of Neuroendocrine Stress Response-Related Circulating MicroRNAs as Biomarkers for Type 2 Diabetes Mellitus and Insulin Resistance	2018	-
microRNA	Homo sapiens	hsa-miR-143	MIMAT0000435	obesity	DOID:9970	5B81	-	25637573	-	downregulation	-	-	-	Obesity leads to alterations in miRNA expressions and miRNA-143 and -223s can be used as biomarkers for the metabolic changes in obesity.	MicroRNA -143 and -223 in obesity	2015	-
microRNA	Homo sapiens	hsa-miR-143	MIMAT0000435	obesity	DOID:9970	5B81	blood	26223376	-	downregulation	real-time qPCR	PCR	Low-throughput	Our findings showed that a significant association is present between circulating miR-370, miR-33, miR-378, miR-27, miR-335, miR-143 and miR-758 values, and childhood obesity. Low levels of miR-335, miR-143 and miR-758, and high levels of miR-27, miR-378, miR-33 and miR-370 may have been responsible for elevated triglycerides and low-density lipoprotein (LDL-C) levels, and low level of high-densi…	The investigation of circulating microRNAs associated with lipid metabolism in childhood obesity	2016	-
microRNA	Homo sapiens	hsa-miR-143	MIMAT0000435	hypertension	DOID:10763	BA00	peripheral blood	24284386	-	downregulation	qRT-PCR	PCR	Low-throughput	Our data provide important evidence that VSMC-modulating microRNAs are closely related to essential hypertension in humans and they may represent potential therapeutic targets in essential hypertension.	Differential expression of vascular smooth muscle-modulating microRNAs in human peripheral blood mononuclear cells: novel targets in essential hypertension	2014	-
microRNA	Homo sapiens	hsa-miR-143	MIMAT0000435	hypertension	DOID:10763	BA00	peripheral blood	29609545	-	upregulation	qRT-PCR	PCR	Low-throughput	NR_034083, NR_104181 and miR-143 may be correlated with the risk for EH development; therefore, epigenetic markers could be used to measure hypertension levels to help elucidate the pathogenesis of EH.	Relationship of cardiovascular disease risk factors and noncoding RNAs with hypertension: a case-control study	2018	-
microRNA	Homo sapiens	hsa-miR-143	MIMAT0000435	hypo-HDL cholesterolemia	DOID:1387	5C81.Z	blood	26223376	-	association	real-time qPCR	PCR	Low-throughput	Low levels of miR-335, miR-143 and miR-758, and high levels of miR-27, miR-378, miR-33 and miR-370 may have been responsible for elevated triglycerides and low-density lipoprotein (LDL-C) levels, and low level of high-density lipoprotein (HDL-C) in obese subjects. Therefore, miRNAs may be a good novel biomarker for childhood obesity.	The investigation of circulating microRNAs associated with lipid metabolism in childhood obesity	2016	-
microRNA	Homo sapiens	hsa-miR-143	MIMAT0000435	obesity	DOID:9970	5B81	plasma	30309709		upregulation	RT-PCR/Immunoassy analysis	PCR;Immunoblotting	Low-throughput	Circulating miRNAs showed significant association with plasma levels of adipokines; adiponectin, leptin, and L/A ratios in adolescents with severe obesity. The study provides that regulation of miRNAs expression is associated with adipokines, and other related MS metabolic factors.	Circulating microRNAs and adipokines as markers of metabolic syndrome in adolescents with obesity	2018	-
microRNA	Homo sapiens	hsa-miR-143	MIMAT0000435	type 2 diabetes mellitus	DOID:9352	5A11	vascular smooth muscle	24927876	KLF4	upregulation	qRT-PCR	PCR	Low-throughput	In conclusion, aberrant expression of miR-143/145 induces a distinct saphenous vein SMC phenotype that may contribute to vascular complications in patients with T2DM, and is potentially amenable to therapeutic manipulation.	Elevated expression levels of miR-143/5 in saphenous vein smooth muscle cells from patients with Type 2 diabetes drive persistent changes in phenotype and function	2014	-
microRNA	Homo sapiens	hsa-miR-143-3p	MIMAT0000435	metabolic syndrome	DOID:14221	5A44	serum	30392876	IGF2R	upregulation	qRT-PCR/luciferase reporter assay/Western blotting	PCR;luciferase assay;Immunoblotting	Low-throughput	Further qualitative real time- polymerase chain reaction analyses confirmed that circulating levels of miR-143-3p were significantly elevated in MetS patients compared with controls, both in serum and urine samples.	Circulating miR-143-3p inhibition protects against insulin resistance in Metabolic Syndrome via targeting of the insulin-like growth factor 2 receptor	2019	-
microRNA	Homo sapiens	hsa-miR-144	MIMAT0000436	obesity	DOID:9970	5B81	liver	26945479	ABCA1	association	RT-PCR	PCR	Low-throughput	miR-33a/144 and their target gene ABCA1 may contribute to the pathogenesis of NASH in morbidly obese subjects.	Hepatic miR-33a/miR-144 and their target gene ABCA1 are associated with steatohepatitis in morbidly obese subjects	2016	-
microRNA	Homo sapiens	hsa-miR-144	MIMAT0000436	type 2 diabetes mellitus	DOID:9352	5A11	plasma	24497980	-	association	real-time qPCR	PCR	Low-throughput	This study suggests that the association between plasma miR-144 expression and T2D differs between Swedes and Iraqis.	Determination of 14 circulating microRNAs in Swedes and Iraqis with and without diabetes mellitus type 2	2014	-
microRNA	Homo sapiens	hsa-miR-144	MIMAT0000436	type 2 diabetes mellitus	DOID:9352	5A11	plasma	26175178	IRS-1/P2Y12	upregulation	-	-	-	In conclusion, hyperglycemia may activate platelets through miR-144 and miR-223 to downregulate IRS-1 and upregulate P2Y12 expression in the platelets of T2DM patients through an IRS-1-PI3K-Akt signaling. Low platelet and plasma miR-223 expression in addition to high platelet and plasma miR-144 expression are risk factors for ischemic stroke in T2DM patients.	Biomarkers Associated with Ischemic Stroke in Diabetes Mellitus Patients	2016	-
microRNA	Homo sapiens	hsa-miR-144	MIMAT0000436	type 2 diabetes mellitus	DOID:9352	5A11	plasma	29643835	-	upregulation	qRT-PCR	PCR	Low-throughput	let-7b, miR-142, miR-144, and miR-29a in plasma may be important markers of neuroendocrine stress response and may play a role in the pathogenesis of T2DM and IR.	Identification of Neuroendocrine Stress Response-Related Circulating MicroRNAs as Biomarkers for Type 2 Diabetes Mellitus and Insulin Resistance	2018	-
microRNA	Homo sapiens	hsa-miR-144-3p	MIMAT0000436	hypo-HDL cholesterolemia	DOID:1387	5C81.Z	serum	24733347	ABCA1	association	real-time qPCR/luciferase reporter assays/Western Blotting	PCR;Luciferase assay;Immunoblotting	Low-throughput	Our findings clearly indicate that miR-144-3p is essential for the regulation of cholesterol homeostasis and inflammatory reactions, supporting its utility as a potential therapeutic target of atherosclerosis and a promising diagnostic biomarker of AMI.	An agomir of miR-144-3p accelerates plaque formation through impairing reverse cholesterol transport and promoting pro-inflammatory cytokine production	2014	-
microRNA	Homo sapiens	hsa-miR-144-3p	MIMAT0000436	type 2 diabetes mellitus	DOID:9352	5A11	serum	28260062	-	upregulation	RT-qPCR	PCR	Low-throughput	In conclusion, the present study demonstrated that serum miRNAs may be novel biomarkers for T2DM and provided novel insights into the pathogenesis of T2DM.	Serum microRNA profiling and bioinformatics analysis of patients with type 2 diabetes mellitus in a Chinese population	2017	-
microRNA	Homo sapiens	hsa-miR-145	MIMAT0000437	type 2 diabetes mellitus	DOID:9352	5A11	vascular smooth muscle	24927876	-	upregulation	qRT-PCR	PCR	Low-throughput	In conclusion, aberrant expression of miR-143/145 induces a distinct saphenous vein SMC phenotype that may contribute to vascular complications in patients with T2DM, and is potentially amenable to therapeutic manipulation.	Elevated expression levels of miR-143/5 in saphenous vein smooth muscle cells from patients with Type 2 diabetes drive persistent changes in phenotype and function	2014	-
microRNA	Homo sapiens	hsa-miR-145	MIMAT0000437	hypertension	DOID:10763	BA00	atherosclerotic plaques	23339529	-	upregulation	real-time qPCR	PCR	Low-throughput	To the best of our knowledge, this study is the first demonstration that hypertension may upregulate miR-145 expression in human atherosclerotic plaques. Future investigations will be necessary to establish the molecular readout of miR-145 upregulation in atherosclerotic lesions in hypertension.	Overexpression of microRNA-145 in atherosclerotic plaques from hypertensive patients	2013	-
microRNA	Homo sapiens	hsa-miR-145	MIMAT0000437	hypertension	DOID:10763	BA00	peripheral blood	24284386	-	downregulation	qRT-PCR	PCR	Low-throughput	Our data provide important evidence that VSMC-modulating microRNAs are closely related to essential hypertension in humans and they may represent potential therapeutic targets in essential hypertension.	Differential expression of vascular smooth muscle-modulating microRNAs in human peripheral blood mononuclear cells: novel targets in essential hypertension	2014	-
microRNA	Homo sapiens	hsa-miR-146a	MIMAT0000449	metabolic syndrome	DOID:14221	5A44	peripheral blood	25958310	-	association	polymerase chain reaction-restriction fragment length polymorphism (PCR-RFLP)	PCR-RFLP	Low-throughput	The C allele of miRNA-146a rs2910164 showed positive association with increased susceptibility to metabolic syndrome and its phenotypes in the study population.	Association of MicroRNA-146a rs2910164 Gene Polymorphism with Metabolic Syndrome	2015	-
microRNA	Homo sapiens	hsa-miR-146a	MIMAT0000449	obesity	DOID:9970	5B81	plasma	29607782	-	downregulation	RT-PCR	PCR	Low-throughput	Overweight and obesity, independent of other cardiometabolic risk factors, negatively influences circulating inflammation-related miRs. Dysregulation of circulating miRs may contribute mechanistically to the heightened inflammatory state associated with overweight and obesity.	Influence of Overweight and Obesity on Circulating Inflammation-Related microRNA	2018	-
microRNA	Homo sapiens	hsa-miR-146a	MIMAT0000449	obesity	DOID:9970	5B81	adipose tissue	29721017	SFRP4	upregulation	qRT-PCR	PCR	Low-throughput	This study suggests a novel association between the elevated levels of miRNAs miR-24, miR-30d, and miR-146a (apparently coregulated) and the level of SFRP4 transcript in AbdAT of subjects with obesity and T2DM.	Elevated and Correlated Expressions of miR-24, miR-30d, miR-146a, and SFRP-4 in Human Abdominal Adipose Tissue Play a Role in Adiposity and Insulin Resistance	2018	-
microRNA	Homo sapiens	hsa-miR-146a	MIMAT0000449	obesity	DOID:9970	5B81	subcutaneous adipose tissue	27922090	IRAK1/TRAF6	upregulation	real-time qPCR/Western Blotting	PCR;Immunoblotting	Low-throughput	Taken together, we could show that miR-146a reduces the inflammatory response in human adipocytes. In a negative feedback loop miR-146a might contribute to the regulation of inflammatory processes in WAT and possibly prevent an overwhelming inflammatory response.	miR-146a-mediated suppression of the inflammatory response in human adipocytes	2016	-
microRNA	Homo sapiens	hsa-miR-146a	MIMAT0000449	type 2 diabetes mellitus	DOID:9352	5A11	blood	28164605	-	association	PCR-RFLP	PCR	Low-throughput	Our findings suggest that miR-146a rs2910164 polymorphism might be associated with T2D and its cardiovascular risk factors in an Iranian population.	Association of miR-146a rs2910164 and miR-149 rs2292832 Variants with Susceptibility to Type 2 Diabetes	2016	-
microRNA	Homo sapiens	hsa-miR-146a	MIMAT0000449	type 2 diabetes mellitus	DOID:9352	5A11	peripheral blood	21249428	TRAF-6	downregulation	RT-PCR	PCR	Low-throughput	The miR-146a expression levels were significantly decreased in PBMCs from patients with Type 2 diabetes compared to control subjects.	Impaired miR-146a expression links subclinical inflammation and insulin resistance in Type 2 diabetes	2011	-
microRNA	Homo sapiens	hsa-miR-146a	MIMAT0000449	type 2 diabetes mellitus	DOID:9352	5A11	plasma	24023848	-	upregulation	qPCR	PCR	Low-throughput	We found that circulating miRNA-146a levels were significantly elevated in new-T2DM patients compared with healthy controls. Whether expression of circulating miRNA-146a holds predictive value for T2DM warrants further investigations.	Increased microRNA-146a levels in plasma of patients with newly diagnosed type 2 diabetes mellitus	2013	-
microRNA	Homo sapiens	hsa-miR-146a	MIMAT0000449	type 2 diabetes mellitus	DOID:9352	5A11	plasma	29058209	-	downregulation	real-time qPCR	PCR	Low-throughput	Our study demonstrated that miR-146a circulating levels were significantly elevated in controls compared with T2D patients. In addition, we identified that rs2910164-C allele is associated with reduced expression levels of the miR-146a but not its mRNAs targets and cytokine levels in diabetic patients.	The rs2910164 variant is associated with reduced miR-146a expression but not cytokine levels in patients with type 2 diabetes	2018	-
microRNA	Homo sapiens	hsa-miR-146a	MIMAT0000449	type 2 diabetes mellitus	DOID:9352	5A11	adipose tissue	29721017	SFRP4	upregulation	qPCR	PCR	Low-throughput	This study suggests a novel association between the elevated levels of miRNAs miR-24, miR-30d, and miR-146a (apparently coregulated) and the level of SFRP4 transcript in AbdAT of subjects with obesity and T2DM.	Elevated and Correlated Expressions of miR-24, miR-30d, miR-146a, and SFRP-4 in Human Abdominal Adipose Tissue Play a Role in Adiposity and Insulin Resistance	2018	-
microRNA	Homo sapiens	hsa-miR-146a	MIMAT0000449	hypertension	DOID:10763	BA00	plasma	29615793	-	downregulation	RT-qPCR	PCR	Low-throughput	These results suggest that hypertension, independent of other cardiometabolic risk factors, adversely affects the circulating profile of a subset of vascular-related miRNAs that have been link to CVD risk and development.	Association between hypertension and circulating vascular-related microRNAs	2018	-
microRNA	Homo sapiens	hsa-miR-146a	MIMAT0000449	obesity	DOID:9970	5B81	plasma	30309709		downregulation	RT-PCR/Immunoassy analysis	PCR;Immunoblotting	Low-throughput	Circulating miRNAs showed significant association with plasma levels of adipokines; adiponectin, leptin, and L/A ratios in adolescents with severe obesity. The study provides that regulation of miRNAs expression is associated with adipokines, and other related MS metabolic factors.	Circulating microRNAs and adipokines as markers of metabolic syndrome in adolescents with obesity	2018	-
microRNA	Homo sapiens	hsa-miR-146a	MIMAT0000449	hyperlipidemia	DOID:1168	5C80.1	serum	24928089	-	upregulation	microarray	microarray	Low-throughput	These data show a statistically significant correlation of the analyzed miRNA with increased lipids, specifically with α- and β-lipoproteins, and CRP and IL-1β levels in HL and/or HG sera, suggesting a contribution of these miRNAs to the atherosclerotic process.	Analysis of circulating microRNAs that are specifically increased in hyperlipidemic and/or hyperglycemic sera	2014	-
microRNA	Homo sapiens	hsa-miR-146a-5p	MIMAT0000449	metabolic syndrome	DOID:14221	5A44	blood	30771749	-	upregulation	-	-	-	The expression of miR-21-5p, miR-122-5p, and miR-146a-5p was significantly higher in subjects with MetS than those without MetS.	Associations of blood levels of trace elements and heavy metals with metabolic syndrome in Chinese male adults with microRNA as mediators involved	2019	-
microRNA	Homo sapiens	hsa-miR-146a-5p	MIMAT0000449	obesity	DOID:9970	5B81	plasma	30212608		upregulation	-	-	-	In conclusion, the inflamma-miR-146a-5p can serve as a personalized predictor of clinical outcome in obese patients entering physical activity weight-reduction programs.	Physical Activity Modulates the Overexpression of the Inflammatory miR-146a-5p in Obese Patients	2018	-
microRNA	Homo sapiens	hsa-miR-146b	MIMAT0002809	type 2 diabetes mellitus	DOID:9352	5A11	serum	28966078	-	upregulation	high-throughput sequencing	sequencing	High-throughput	Our results provide a better understanding of the role of circulating miRNAs, particularly miR-486, miR-146b and miR-15b, in predicting the future risk of T2D in obese children.	Change in circulating microRNA profile of obese children indicates future risk of adult diabetes	2018	-
microRNA	Homo sapiens	hsa-miR-146b	MIMAT0002809	obesity	DOID:9970	5B81	visceral adipose tissue	24931160	KLF7	differential expression	real-time PCR/luciferase reporter assays	PCR;luciferase assay	Low-throughput	Our data indicates that miR-146b may be a new therapeutic target against human visceral obesity and metabolic dysfunction.	MiR-146b is a regulator of human visceral preadipocyte proliferation and differentiation and its expression is altered in human obesity	2014	-
microRNA	Homo sapiens	hsa-miR-146b	MIMAT0002809	obesity	DOID:9970	5B81	adipocyte	24428800	TNF-α/IL-6	upregulation	qRT-PCR/luciferase reporter assays	PCR;luciferase assays	Low-throughput	Our results indicated that a novel role for miR-146b in adipose tissue inflammation and miR-146b may be an important mediator in the process of obesity complications via its own transcription mechanism.	IL-6 and TNF-α induced obesity-related inflammatory response through transcriptional regulation of miR-146b	2014	-
microRNA	Homo sapiens	hsa-miR-146b-5p	MIMAT0002809	obesity	DOID:9970	5B81	monocyte	22393448	IRAK1/TRAF6	downregulation	qRT-PCR/Western blotting	PCR;Immunoblotting	Low-throughput	miR-146b-5p, decreased in monocytes during obesity, is a major mediator of the anti-inflammatory action of globular adiponectin. It appears not to be involved in insulin signaling possibly by protective response of IRAK3 and lack of mitochondrial ROS production.	Decrease of miR-146b-5p in monocytes during obesity is associated with loss of the anti-inflammatory but not insulin signaling action of adiponectin	2012	-
microRNA	Homo sapiens	hsa-miR-148a	MIMAT0000243	obesity	DOID:9970	5B81	adipose tissue	26001136	Wnt1	upregulation	qRT-PCR/luciferase reporter assay/Western blotting	PCR;luciferase assay;Immunoblotting	Low-throughput	The results suggest that miR-148a is a biomarker of obesity in human subjects and mouse model, which represents a CREB-modulated miRNA that acts to repress Wnt1, thereby promoting adipocyte differentiation.	miR-148a is Associated with Obesity and Modulates Adipocyte Differentiation of Mesenchymal Stem Cells through Wnt Signaling	2015	-
microRNA	Homo sapiens	hsa-miR-148a	MIMAT0000243	obesity	DOID:9970	5B81	adipose tissue	27878286	-	upregulation	RT-qPCR/luciferase reporter assays	PCR;luciferase assay	Low-throughput	The results of the present study indicated a novel role of miR‑148a in adipocyte inflammation; therefore, miR‑148a may be involved in obesity complications via its own underlying transcriptional mechanism.	Obesity‑associated miR‑148a is regulated by cytokines and adipokines via a transcriptional mechanism	2016	-
microRNA	Homo sapiens	hsa-miR-148a-3p	MIMAT0000243	obesity	DOID:9970	5B81	adipose tissue	26527284	DNMT1	upregulation	qRT-PCR	PCR	Low-throughput	Our results indicate that miR-148a-3p mediated regulation of DNMT1 expression may play a mechanistic role in obesity.	Obesity Associated Modulation of miRNA and Co-Regulated Target Transcripts in Human Adipose Tissue of Non-Diabetic Subjects	2015	-
microRNA	Homo sapiens	hsa-miR-148b	MIMAT0000759	obesity	DOID:9970	5B81	visceral adipose tissue	25518011	-	downregulation	qRT-PCR	PCR	Low-throughput	These data show that visceral adipocytes shed exosomal-mediators predicted to regulate key end-organ inflammatory and fibrotic signaling pathways.	Adipocyte-derived exosomal miRNAs: a novel mechanism for obesity-related disease	2015	GSE50574
microRNA	Homo sapiens	hsa-miR-149-5p	MIMAT0000450	type 2 diabetes mellitus	DOID:9352	5A11	serum	28848152	TNF-α	differential expression	high-throughput sequencing	sequencing;PCR;luciferase assays	High-throughput	TNF-α and miR-149-5p were differentially expressed in T2DM vascular endothelial injury. The over-expression of miR-149-5p ameliorates the high glucose-induced injury in the HUVECs by regulating the expression of TNF-α and ERS markers.	Effect of the Diabetic Environment On the Expression of MiRNAs in Endothelial Cells: Mir-149-5p Restoration Ameliorates the High Glucose-Induced Expression of TNF-α and ER Stress Markers	2017	-
microRNA	Homo sapiens	hsa-miR-150	MIMAT0000451	obesity	DOID:9970	5B81	plasma	29607782	-	downregulation	RT-PCR	PCR	Low-throughput	Overweight and obesity, independent of other cardiometabolic risk factors, negatively influences circulating inflammation-related miRs. Dysregulation of circulating miRs may contribute mechanistically to the heightened inflammatory state associated with overweight and obesity.	Influence of Overweight and Obesity on Circulating Inflammation-Related microRNA	2018	-
microRNA	Homo sapiens	hsa-miR-150-5p	MIMAT0000451	type 2 diabetes mellitus	DOID:9352	5A11	plasma	30461200	-	differential expression	microarray/RT-qPCR	array;PCR	Low-throughput	Our findings suggest that genetic polymorphisms of TGFBRAP1 may contribute to the genetic susceptibility of T2DM by mediating diabetes-related miRNA expression.	The variant at TGFBRAP1 is significantly associated with type 2 diabetes mellitus and affects diabetes-related miRNA expression	2019	-
microRNA	Homo sapiens	hsa-miR-152	MIMAT0000438	obesity	DOID:9970	5B81	serum	25912229	-	upregulation	real-time qPCR	PCR	Low-throughput	Our study is one of the pioneer studies showing the differences in peripheral miRNA level in obesity, T2DM and T2DM combined with obesity. The study results suggest the potential utility of miRNAs in the prediction for obesity and T2DM.	Profiling peripheral microRNAs in obesity and type 2 diabetes mellitus	2015	-
microRNA	Homo sapiens	hsa-miR-152	MIMAT0000438	type 2 diabetes mellitus	DOID:9352	5A11	blood	30106118	PI3Kα	downregulation	RT-qPCR	PCR	Low-throughput	In conclusion, the results of the present study demonstrate that miR‑152 may have an important role in pancreatic β cell function, and established an association between miR‑152 and the PI3Kα axis. Therefore, targeting PI3Kα may be a potential therapeutic option for diabetes.	MicroRNA‑152 regulates insulin secretion and pancreatic β cell proliferation by targeting PI3Kα	2018	-
microRNA	Homo sapiens	hsa-miR-152-3p	MIMAT0000438	type 2 diabetes mellitus	DOID:9352	5A11	islet	28332581	PDHA1/GCK	upregulation	real-time qPCR	PCR	Low-throughput	The data further strengthen the wide-ranging influence of microRNAs in pancreatic beta cell function, and hence their potential as therapeutic targets in type-2 diabetes.	Elevated miR-130a/miR130b/miR-152 expression reduces intracellular ATP levels in the pancreatic beta cell	2017	-
microRNA	Homo sapiens	hsa-miR-155	MIMAT0000646	obesity	DOID:9970	5B81	adipose tissue	26829440	PPARγ	upregulation	qPCR/luciferase reporter assay	PCR;luciferase assay	Low-throughput	Altogether, these data are evidence of a proinflammatory loop mediated by NF-κB and miR-155 that could participate in the amplification of inflammatory status in adipocytes.	Obesity-associated Inflammation Induces microRNA-155 Expression in Adipocytes and Adipose Tissue: Outcome on Adipocyte Function	2016	-
microRNA	Homo sapiens	hsa-miR-155	MIMAT0000646	obesity	DOID:9970	5B81	sperm	29896216	-	upregulation	RT-qPCR	PCR	Low-throughput	Our results showed that obese subjects have increased expressions of miR-155 and miR-122, two microRNAs that were previously related with inflammation and iron metabolism, respectively, at both the systemic and sperm levels.	miR-155 and miR-122 Expression of Spermatozoa in Obese Subjects	2018	-
microRNA	Homo sapiens	hsa-miR-155	MIMAT0000646	obesity	DOID:9970	5B81	serum	29479888	-	downregulation	qRT-PCR	PCR	Low-throughput	A reduced level of miR-155 might associate with obesity and its related metabolic traits such as hyperinsulinemia and dyslipidemia.	Decreased Serum Level of miR-155 is Associated with Obesity and its Related Metabolic Traits	2018	-
microRNA	Homo sapiens	hsa-miR-155	MIMAT0000646	type 2 diabetes mellitus	DOID:9352	5A11	peripheral blood	23616185	-	downregulation	real-time qPCR	PCR	Low-throughput	Downregulated levels of miR-155 could play an important role in the pathogenesis of T2D due to their relationship with metabolic control.	Dysregulated miR-155 expression in peripheral blood mononuclear cells from patients with type 2 diabetes	2013	-
microRNA	Homo sapiens	hsa-miR-155	MIMAT0000646	hypertension	DOID:10763	BA00	peripheral blood	20966899	AT1R	downregulation	qRT-PCR/Western blotting	PCR;Immunoblotting	Low-throughput	The interplay between miR-155 expression, +1166C polymorphism, and AT1R protein expression may have a role in the regulation of blood pressure.	Interplay between miR-155, AT1R A1166C polymorphism, and AT1R expression in young untreated hypertensives	2011	-
microRNA	Homo sapiens	hsa-miR-155	MIMAT0000646	hypo-HDL cholesterolemia	DOID:1387	5C81.Z	serum	26267685	-	association	real-time qPCR	PCR	Low-throughput	Serum miRNA-155 was positively correlated with the level of IL-6 as well as hs-CRP, while miR-155 was negatively correlated with HDL and albumin.	Effect of alprostadil on serum level of miRNA-155 in uremic patients	2015	-
microRNA	Homo sapiens	hsa-miR-155-5p	MIMAT0000646	hypertension	DOID:10763	BA00	plasma	29146158	-	upregulation	qRT-PCR	PCR	Low-throughput	The miR-155-5p was increased among CKD patients and further increased among subjects presenting with NHT.	Plasma microRNA-155-5p is increased among patients with chronic kidney disease and nocturnal hypertension	2017	-
microRNA	Homo sapiens	hsa-miR-15a	MIMAT0000068	type 2 diabetes mellitus	DOID:9352	5A11	plasma	28173719	-	upregulation	qRT-PCR	PCR	Low-throughput	Our findings suggest that circulating miR-15a contributes to the pathogenesis of diabetes and supports the concept that miRNAs released by one cell type can travel through the circulation and play a role in disease progression via their transfer to different cell types, inducing oxidative stress and cell injury.	Exosomal MicroRNA-15a Transfer from the Pancreas Augments Diabetic Complications by Inducing Oxidative Stress	2017	-
microRNA	Homo sapiens	hsa-miR-15a	MIMAT0000068	type 2 diabetes mellitus	DOID:9352	5A11	peripheral blood	26460159	-	downregulation	qRT-PCR	PCR	Low-throughput	These results demonstrated that peripheral blood miR‑15a expression levels were significantly lower in patients with T2D and IFG/IGT individuals, compared with healthy individuals. Thus, miR‑15a in peripheral whole blood may serve as a potential biomarker for T2D and pre-diabetes.	Peripheral blood microRNA-15a is a potential biomarker for type 2 diabetes mellitus and pre-diabetes	2015	-
microRNA	Homo sapiens	hsa-miR-15a	MIMAT0000068	obesity	DOID:9970	5B81	blood	23396142	-	downregulation	microarray/RT-qPCR	microarray;PCR	Low-throughput	Circulating miRNAs are deregulated in severe obesity. Weight loss-induced changes in this profile and the study of in silico targets support this observation and suggest a potential mechanistic relevance.	Targeting the circulating microRNA signature of obesity	2013	-
microRNA	Homo sapiens	hsa-miR-15a	MIMAT0000068	obesity	DOID:9970	5B81	plasma	30309709		downregulation	RT-PCR/Immunoassy analysis	PCR;Immunoblotting	Low-throughput	Circulating miRNAs showed significant association with plasma levels of adipokines; adiponectin, leptin, and L/A ratios in adolescents with severe obesity. The study provides that regulation of miRNAs expression is associated with adipokines, and other related MS metabolic factors.	Circulating microRNAs and adipokines as markers of metabolic syndrome in adolescents with obesity	2018	-
microRNA	Homo sapiens	hsa-miR-15b	MIMAT0000417	obesity	DOID:9970	5B81	plasma	28342299	-	association	qRT-PCR	PCR	Low-throughput	The findings provide evidence that circulating miRNAs play important roles in obesity and weight gain and suggest new targets for understanding the mechanisms of weight gain and developing weight loss intervention strategies.	Plasma MicroRNA signature predicting weight gain among Mexican-American women	2017	-
microRNA	Homo sapiens	hsa-miR-15b	MIMAT0000417	obesity	DOID:9970	5B81	serum	24204780	-	upregulation	RT-qPCR	PCR	Low-throughput	This study is the first to show a panel of serum miRNAs for obesity, and compare them with miRNAs identified in serum for diabetes and obesity with diabetes. Our results support the use of some miRNAs extracted from serum samples as potential predictive tools for obesity and type 2 diabetes.	Serum circulating microRNA profiling for identification of potential type 2 diabetes and obesity biomarkers	2013	-
microRNA	Homo sapiens	hsa-miR-15b	MIMAT0000417	type 2 diabetes mellitus	DOID:9352	5A11	serum	28966078	-	upregulation	high-throughput sequencing	sequencing	High-throughput	Our results provide a better understanding of the role of circulating miRNAs, particularly miR-486, miR-146b and miR-15b, in predicting the future risk of T2D in obese children.	Change in circulating microRNA profile of obese children indicates future risk of adult diabetes	2018	-
microRNA	Homo sapiens	hsa-miR-15b	MIMAT0000417	type 2 diabetes mellitus	DOID:9352	5A11	skeletal muscle	25403480	-	downregulation	high-throughput sequencing	sequencing	High-throughput	Type 2 diabetes is associated with non-genetic downregulation of several miRNAs in skeletal muscle including miR-15b and miR-16, potentially targeting insulin signalling.	Glucose tolerance is associated with differential expression of microRNAs in skeletal muscle: results from studies of twins with and without type 2 diabetes	2015	GSE38835
microRNA	Homo sapiens	hsa-miR-16	MIMAT0000069	obesity	DOID:9970	5B81	subcutaneous adipose tissue	30565074	-	association	real-time qPCR	PCR	Low-throughput	These results highlight the importance of miRNA expression in subcutaneous adipose tissue and encourage further investigation of miRNAs as prognostic markers.	Differential expression of miRNAs related to angiogenesis and adipogenesis in subcutaneous fat of obese and nonobese women	2019	-
microRNA	Homo sapiens	hsa-miR-16	MIMAT0000069	type 2 diabetes mellitus	DOID:9352	5A11	skeletal muscle	25403480	-	downregulation	high-throughput sequencing	sequencing	High-throughput	Type 2 diabetes is associated with non-genetic downregulation of several miRNAs in skeletal muscle including miR-15b and miR-16, potentially targeting insulin signalling.	Glucose tolerance is associated with differential expression of microRNAs in skeletal muscle: results from studies of twins with and without type 2 diabetes	2015	GSE38835
microRNA	Homo sapiens	hsa-miR-16-5p	MIMAT0000069	hypertension	DOID:10763	BA00	plasma	26798072	-	downregulation	qRT-PCR	PCR	Low-throughput	This study showed that hsa-miR-92a-3p, hsa-miR-21-5p, and hsa-miR-16-5p may be used as normalizers for plasma miRNA expression data in essential hypertension studies.	Identification of Suitable Endogenous Normalizers for qRT-PCR Analysis of Plasma microRNA Expression in Essential Hypertension	2016	-
microRNA	Homo sapiens	hsa-miR-17	MIMAT0000070	obesity	DOID:9970	5B81	serum	25912229	-	upregulation	real-time qPCR	PCR	Low-throughput	Our study is one of the pioneer studies showing the differences in peripheral miRNA level in obesity, T2DM and T2DM combined with obesity. The study results suggest the potential utility of miRNAs in the prediction for obesity and T2DM.	Profiling peripheral microRNAs in obesity and type 2 diabetes mellitus	2015	-
microRNA	Homo sapiens	hsa-miR-17-5p	MIMAT0000070	obesity	DOID:9970	5B81	omental adipose tissue	21367929	-	differential expression	microarray/RT-qPCR	microarray;PCR	Low-throughput	This study demonstrates that candidate metabolic miRNAs are altered in adipose tissue and circulation of the obese. Omental fat tissue and systemic miRNA levels reflect components of the metabolic syndrome, highlighting their potential as novel biomarkers for this complex syndrome.	Differential miRNA expression in omental adipose tissue and in the circulation of obese patients identifies novel metabolic biomarkers	2011	-
microRNA	Homo sapiens	hsa-miR-181a	MIMAT0000256	obesity	DOID:9970	5B81	monocyte	22535975	-	downregulation	microarray/RT-qPCR	microarray;PCR	Low-throughput	This study demonstrates that the TLR/NFκB-related miR-181a is down-regulated in monocytes of obese patients and suggests that it is a putative biomarker of metabolic syndrome and CAD.	Decreased miR-181a expression in monocytes of obese patients is associated with the occurrence of metabolic syndrome and coronary artery disease	2012	GSE34223
microRNA	Homo sapiens	hsa-miR-181a	MIMAT0000256	hypertension	DOID:10763	BA00	renal cortex	22042811	REN/AIFM1	differential expression	microarray/qRT-PCR/luciferase assays	microarray;PCR;Luciferase assay	Low-throughput	The observed downregulation of 2 miRNAs in hypertension could explain the elevation in intrarenal renin mRNA. Renin, CD36, and other mRNAs, as well as miRNAs and associated pathways identified in the present study, provide novel insights into hypertension etiology.	Gene expression profiling reveals renin mRNA overexpression in human hypertensive kidneys and a role for microRNAs	2011	GSE28260
microRNA	Homo sapiens	hsa-miR-181a	MIMAT0000256	metabolic syndrome	DOID:14221	5A44	peripheral blood	22535975	-	downregulation	microarray/RT-qPCR	microarray;PCR	Low-throughput	This study demonstrates that the TLR/NFκB-related miR-181a is down-regulated in monocytes of obese patients and suggests that it is a putative biomarker of metabolic syndrome and CAD.	Decreased miR-181a expression in monocytes of obese patients is associated with the occurrence of metabolic syndrome and coronary artery disease	2012	GSE34223
microRNA	Homo sapiens	hsa-miR-181a	MIMAT0000256	obesity	DOID:9970	5B81	plasma	30383229	-	differential expression	microarray/RT-qPCR	microarray;PCR	Low-throughput	Our study has provided evidence that the circulating miRNAs associated with various disorders are dysregulated in women who are obese. We also found that seven of these miRNAs showed levels comparable to those in lean controls after acute weight loss in women who are obese.	Acute Weight Loss Restores Dysregulated Circulating MicroRNAs in Individuals Who Are Obese	2019	-
microRNA	Homo sapiens	hsa-miR-181a-3p	MIMAT0000270	obesity	DOID:9970	5B81	adipose tissue	27480132	SIRT1	association	real-time qPCR	PCR	Low-throughput	We observed obesity-associated downregulation of SIRT1 and upregulation of SIRT7 mRNA levels that were not associated with the methylation status of their promoters. We found a negative correlation between mRNA levels of SIRT1 in VAT of obese individuals and SIRT7 in VAT of the normal-weight subjects and expression of the relevant miRNAs.	SIRT1 and SIRT7 expression in adipose tissues of obese and normal-weight individuals is regulated by microRNAs but not by methylation status	2016	-
microRNA	Homo sapiens	hsa-miR-181a-5p	MIMAT0000256	obesity	DOID:9970	5B81	adipose tissue	29409019	PTEN/S6K	downregulation	real-time PCR/luciferase reporter assay/Western blotting	PCR;luciferase assay;Immunoblotting	Low-throughput	miR-181a-5p and miR-23a-3p may prevent TNFα-induced IR in adipocytes through modulation of PTEN and S6K expression.	Altered Expression of miR-181a-5p and miR-23a-3p Is Associated With Obesity and TNFα-Induced Insulin Resistance	2018	-
microRNA	Homo sapiens	hsa-miR-181b	MIMAT0000257	obesity	DOID:9970	5B81	adipose tissue	26830849	PHLPP2	downregulation	real-time qPCR/luciferase reporter assays/Western Blotting	PCR;luciferase assay;Immunoblotting	Low-throughput	Our data underscore the importance of adipose tissue EC function in controlling the development of insulin resistance. Delivery of miR-181b or Pleckstrin homology domain leucine-rich repeat protein phosphatase inhibitors may represent a new therapeutic approach to ameliorate insulin resistance by improving adipose tissue endothelial Akt-endothelial nitric oxide synthase-nitric oxide signaling.	MicroRNA-181b Improves Glucose Homeostasis and Insulin Sensitivity by Regulating Endothelial Function in White Adipose Tissue	2016	GSE35030
microRNA	Homo sapiens	hsa-miR-181b	MIMAT0000257	hypertension	DOID:10763	BA00	placental tissue	25289053	PAI-1	downregulation	RT-qPCR/Western blotting/immunohistochemical	PCR;Immunoblotting;Transfection	Low-throughput	miRNA-181b may play an important role in the regulation of PAI-1. PAI-1 and miRNA-181b may be novel biomarkers to be used in HDCP therapy.	Levels of microRNA-181b and plasminogen activator inhibitor-1 are associated with hypertensive disorders complicating pregnancy	2014	-
microRNA	Homo sapiens	hsa-miR-185	MIMAT0000455	type 2 diabetes mellitus	DOID:9352	5A11	buccal epithelial cells	26426397	-	association	luciferase assays	luciferase assays	Low-throughput	In vitro experiments showed that miR-185 reduces the amount of the resulting protein, and rs9457 miRSNP significantly influences the rate of reduction in a luciferase reporter assay.	Micro-RNA Binding Site Polymorphisms in the WFS1 Gene Are Risk Factors of Diabetes Mellitus	2015	-
microRNA	Homo sapiens	hsa-miR-185	MIMAT0000455	type 2 diabetes mellitus	DOID:9352	5A11	plasma	25658748	SOCS3	downregulation	qPCR/luciferase reporter assay	PCR;luciferase assays	Low-throughput	In conclusion, this study revealed a functional and mechanistic link between miR-185 and SOCS3 in the pathogenesis of diabetes. MiR-185 plays an important role in the regulation of insulin secretion and β-cell growth in diabetes. Restoration of miR-185 expression may serve a potentially promising and efficient therapeutic approach for diabetes.	MicroRNA-185 targets SOCS3 to inhibit beta-cell dysfunction in diabetes	2015	-
microRNA	Homo sapiens	hsa-miR-185	MIMAT0000455	hypertension	DOID:10763	BA00	aortic vascular smooth muscle cells	28277742	P2Y6	association	real-time PCR/luciferase reporter assay/Western blotting	PCR;Luciferase assay;Immunoblotting	Low-throughput	Taken together, the present study indicated that miR-185/P2Y6 axis might inhibit Ang II-induced HAVSMC proliferation through miR-185 negatively regulating P2Y6 expression and the downstream ERK pathway; rescuing miR-185 expression to inhibit P2Y6 may represent a therapeutic strategy against HAVSMC dysfunction and hypertension.	miR-185/P2Y6 Axis Inhibits Angiotensin II-Induced Human Aortic Vascular Smooth Muscle Cell Proliferation	2017	-
microRNA	Homo sapiens	hsa-miR-185	MIMAT0000455	hypo-HDL cholesterolemia	DOID:1387	5C81.Z	hepatocyte	23459944	SR-BI	association	RT-PCR/luciferase report assays/Western blotting	PCR;Luciferase assay;Immunoblotting	Low-throughput	These data suggest that miR-185, miR-96, and miR-223 may repress selective HDL-C uptake through the inhibition of SR-BI in human hepatic cells, implying a novel mode of regulation of hepatic SR-BI and an important role of miRNAs in modulating cholesterol metabolism.	MicroRNAs 185, 96, and 223 repress selective high-density lipoprotein cholesterol uptake through posttranscriptional inhibition	2013	-
microRNA	Homo sapiens	hsa-miR-187	MIMAT0000262	type 2 diabetes mellitus	DOID:9352	5A11	islet	24149837	HIPK3	upregulation	RT-qPCR/luciferase reporter assays	PCR;luciferase assays	Low-throughput	Our findings suggest a role for miR-187 in the blunting of insulin secretion, potentially involving regulation of HIPK3, which occurs during the pathogenesis of type 2 diabetes.	Increased expression of miR-187 in human islets from individuals with type 2 diabetes is associated with reduced glucose-stimulated insulin secretion	2014	-
microRNA	Homo sapiens	hsa-miR-18a	MIMAT0000072	type 2 diabetes mellitus	DOID:9352	5A11	peripheral blood	28661068	-	upregulation	qRT-PCR	PCR	Low-throughput	MiR-18a and miR-34c in PBMCs may be important marker of stress reaction and may play a role in vulnerability to T2DM as well as IR.	Expression of miR-18a and miR-34c in circulating monocytes associated with vulnerability to type 2 diabetes mellitus and insulin resistance	2017	-
microRNA	Homo sapiens	hsa-miR-1908	MIMAT0007881	obesity	DOID:9970	5B81	adipocyte	24898511	-	upregulation	qPCR	PCR	Low-throughput	miR‑1908 may be an important mediator in the development of obesity‑related complications.	Expression of obesity‑related miR‑1908 in human adipocytes is regulated by adipokines, free fatty acids and hormones	2014	-
microRNA	Homo sapiens	hsa-miR-1908	MIMAT0007881	obesity	DOID:9970	5B81	adipocyte	25421647	-	association	-	-	-	Overexpression of miR-1908 in hMADS cells inhibited adipogenic differentiation and increased cell proliferation, suggesting that miR-1908 is involved in the regulation of adipocyte cell differentiation and metabolism, and, thus, may have an effect on human obesity.	The biological effects of hsa-miR-1908 in human adipocytes	2015	-
microRNA	Homo sapiens	hsa-miR-191	MIMAT0000440	type 2 diabetes mellitus	DOID:9352	5A11	plasma	25814674	-	downregulation	qRT-PCR	PCR	Low-throughput	Quantitative real-time polymerase chain reaction validation confirmed decrease in circulating miR-191 and miR-200b levels in type 2 diabetic versus healthy controls.	Impairment of Wound Healing in Patients With Type 2 Diabetes Mellitus Influences Circulating MicroRNA Patterns via Inflammatory Cytokines	2015	GSE49885
microRNA	Homo sapiens	hsa-miR-191-3p	MIMAT0001618	obesity	DOID:9970	5B81	plasma	30651891	-	downregulation	RT-qPCR	PCR	Low-throughput	Our work showed that several circulating miRNAs are differentially represented in overweight/low-grade obesity children and adolescents. Although causal pathways cannot be firmly inferred, it is conceivable that circulating miRNAs may be new biomarkers of early childhood obesity.	Circulating microRNAs are associated with early childhood obesity: results of the I.Family Study	2019	-
microRNA	Homo sapiens	hsa-miR-192	MIMAT0000222	type 2 diabetes mellitus	DOID:9352	5A11	serum	30250222	-	upregulation	qRT-PCR	PCR	Low-throughput	In conclusion, circulating microRNAs -192 and -194 are potential biomarkers for risk of diabetes.	Circulating microRNAs -192 and -194 are associated with the presence and incidence of diabetes mellitus	2018	-
microRNA	Homo sapiens	hsa-miR-192*	MIMAT0004543	hypo-HDL cholesterolemia	DOID:1387	5C81.Z	visceral adipose tissue	26747651	SCARB1	association	qRT-PCR/luciferase reporter assay/Western blotting	PCR;Luciferase assay;Immunoblotting	Low-throughput	To conclude, the present data identify miR-192* as a novel controller of adipocyte differentiation and lipid homeostasis.	MicroRNA-192* impairs adipocyte triglyceride storage	2016	-
microRNA	Homo sapiens	hsa-miR-192-3p	MIMAT0004543	obesity	DOID:9970	5B81	visceral adipose tissue	26747651	SCD/ALDH3A2	association	qRT-PCR/luciferase reporter assay/Western blotting	PCR;luciferase assay;Immunoblotting	Low-throughput	To conclude, the present data identify miR-192* as a novel controller of adipocyte differentiation and lipid homeostasis.	MicroRNA-192* impairs adipocyte triglyceride storage	2016	-
microRNA	Homo sapiens	hsa-miR-192-5p	MIMAT0000222	hypertension	DOID:10763	BA00	kidney	30595117	Atp1b1	downregulation	RT-PCR/Western blotting	PCR;Immunoblotting	Low-throughput	In conclusion, miR-192-5p in the kidney protects against the development of hypertension, which is mediated, at least in part, by targeting Atp1b1.	MiR-192-5p in the Kidney Protects Against the Development of Hypertension	2019	-
microRNA	Homo sapiens	hsa-miR-193	MIMAT0000459	obesity	DOID:9970	5B81	plasma	30383229	-	differential expression	microarray/RT-qPCR	microarray;PCR	Low-throughput	Our study has provided evidence that the circulating miRNAs associated with various disorders are dysregulated in women who are obese. We also found that seven of these miRNAs showed levels comparable to those in lean controls after acute weight loss in women who are obese.	Acute Weight Loss Restores Dysregulated Circulating MicroRNAs in Individuals Who Are Obese	2019	-
microRNA	Homo sapiens	hsa-miR-193a-3p	MIMAT0000459	obesity	DOID:9970	5B81	subcutaneous adipose tissue	23756832	-	association	microarray/qRT-PCR/luciferase assays	microarray;PCR;luciferase assay;Immunoblotting	Low-throughput	Our data suggest that miR-221 may contribute to the development of the insulin resistance that typically accompanies obesity, by affecting PPAR signalling pathways and by directly downregulating ADIPOR1 and ETS1.	Human adipose microRNA-221 is upregulated in obesity and affects fat metabolism downstream of leptin and TNF-α	2013	-
microRNA	Homo sapiens	hsa-miR-193b	MIMAT0002819	obesity	DOID:9970	5B81	brown adipocyte	21743466	Prdm16/Pparα	upregulation	qRT-PCR/luciferase reporter assay/Western blotting	PCR;luciferase assay;Immunoblotting	Low-throughput	Our results demonstrate that Mir193b-365 serves as an essential regulator for brown fat differentiation, in part by repressing myogenesis.	Mir193b-365 is essential for brown fat differentiation	2011	GSE27614
microRNA	Homo sapiens	hsa-miR-193b	MIMAT0002819	obesity	DOID:9970	5B81	subcutaneous adipose tissue	22688341	CCL2	downregulation	qRT-PCR/luciferase reporter assay/Western blotting	PCR;luciferase assay;Immunoblotting	Low-throughput	Taken together, our data suggest that miRNAs may be important regulators of adipose inflammation through their effects on CCL2 release from human adipocytes and macrophages.	Adipose tissue microRNAs as regulators of CCL2 production in human obesity	2012	-
microRNA	Homo sapiens	hsa-miR-193b-3p	MIMAT0002819	type 2 diabetes mellitus	DOID:9352	5A11	plasma	30083267	-	upregulation	qPCR	PCR	Low-throughput	Our results showed differences in the abundance of pro- and anti-angiogenic miRNAs in Ects of patients with T2DM, and are suggestive of mechanisms underlying the development of vascular complications due to impaired angiogenesis in such patients.	Circulating ectosomes: Determination of angiogenic microRNAs in type 2 diabetes	2018	-
microRNA	Homo sapiens	hsa-miR-193b-5p	MIMAT0004767	obesity	DOID:9970	5B81	subcutaneous adipose tissue	23756832	-	association	microarray/qRT-PCR/luciferase assays	microarray;PCR;luciferase assay;Immunoblotting	Low-throughput	Our data suggest that miR-221 may contribute to the development of the insulin resistance that typically accompanies obesity, by affecting PPAR signalling pathways and by directly downregulating ADIPOR1 and ETS1.	Human adipose microRNA-221 is upregulated in obesity and affects fat metabolism downstream of leptin and TNF-α	2013	-
microRNA	Homo sapiens	hsa-miR-194	MIMAT0000460	type 2 diabetes mellitus	DOID:9352	5A11	serum	30250222	-	upregulation	qRT-PCR	PCR	Low-throughput	In conclusion, circulating microRNAs -192 and -194 are potential biomarkers for risk of diabetes.	Circulating microRNAs -192 and -194 are associated with the presence and incidence of diabetes mellitus	2018	-
microRNA	Homo sapiens	hsa-miR-194	MIMAT0000460	obesity	DOID:9970	5B81	exosomal	30170731	-	upregulation	-	-	-	Present study uncovered the correlation between circulating miR-194 and cardiac parameters in human subjects, and provided solid evidence of the therapeutic application of miR-194 sponge in combating obesity-mediated cardiac dysfunction.	Exosomal microRNA-194 causes cardiac injury and mitochondrial dysfunction in obese mice	2018	-
microRNA	Homo sapiens	hsa-miR-194	MIMAT0000460	type 2 diabetes mellitus	DOID:9352	5A11	skeletal muscle	27163678	-	downregulation	microarray/RT-qPCR	array;PCR	Low-throughput	MiR-194 could be down-regulated in patients with early features of diabetes as an adaptive response to facilitate tissue glucose uptake and metabolism in the face of insulin resistance.	MicroRNA-194 Modulates Glucose Metabolism and Its Skeletal Muscle Expression Is Reduced in Diabetes	2016	GSE68226
microRNA	Homo sapiens	hsa-miR-195	MIMAT0000461	hypertension	DOID:10763	BA00	blood	23032062	-	differential expression	microarray/RT-qPCR	microarray;PCR	Low-throughput	Significant dysregulation of seven candidate microRNAs has been found to be associated with risks involved in the manifestation of metabolic syndrome.	Circulating miRNA profiles in patients with metabolic syndrome	2012	-
microRNA	Homo sapiens	hsa-miR-196a	MIMAT0000226	hypertension	DOID:10763	BA00	renal cortex	22042811	-	differential expression	microarray/qRT-PCR/luciferase assays	microarray;PCR;Luciferase assay	Low-throughput	The observed downregulation of 2 miRNAs in hypertension could explain the elevation in intrarenal renin mRNA. Renin, CD36, and other mRNAs, as well as miRNAs and associated pathways identified in the present study, provide novel insights into hypertension etiology.	Gene expression profiling reveals renin mRNA overexpression in human hypertensive kidneys and a role for microRNAs	2011	GSE28260
microRNA	Homo sapiens	hsa-miR-196a-1	MIMAT0037307	obesity	DOID:9970	5B81	subcutaneous adipose tissue	28649807	HOX	upregulation	RNA-seq/qRT-PCR	sequencing;PCR	High-throughput	The miR196 gene family could play an important role in the regulation of HOX gene expression in subcutaneous adipose tissue and in fat distribution variation.	MicroRNA-196 Regulates HOX Gene Expression in Human Gluteal Adipose Tissue	2017	-
microRNA	Homo sapiens	hsa-miR-196a-2	MIMAT0000226	obesity	DOID:9970	5B81	subcutaneous adipose tissue	28649807	HOX	upregulation	RNA-seq/qRT-PCR	sequencing;PCR	High-throughput	The miR196 gene family could play an important role in the regulation of HOX gene expression in subcutaneous adipose tissue and in fat distribution variation.	MicroRNA-196 Regulates HOX Gene Expression in Human Gluteal Adipose Tissue	2017	-
microRNA	Homo sapiens	hsa-miR-196b	MIMAT0001080	obesity	DOID:9970	5B81	subcutaneous adipose tissue	28649807	HOX	upregulation	RNA-seq/qRT-PCR	sequencing;PCR	High-throughput	The miR196 gene family could play an important role in the regulation of HOX gene expression in subcutaneous adipose tissue and in fat distribution variation.	MicroRNA-196 Regulates HOX Gene Expression in Human Gluteal Adipose Tissue	2017	-
microRNA	Homo sapiens	hsa-miR-197	MIMAT0000227	metabolic syndrome	DOID:14221	5A44	blood	23032062	-	association	microarray/RT-qPCR	microarray;PCR	Low-throughput	We have identified miR-197, miR-23a, and miR-509-5p as potential contributors of dyslipidemia in metabolic syndrome (correlation with body mass index; P = 0.029, 0.021, and 0.042, respectively) and miR-130a and miR-195 as contributors of hypertension (correlation with blood pressure; P = 0.019 and 0.045, respectively).	Circulating miRNA profiles in patients with metabolic syndrome	2012	-
microRNA	Homo sapiens	hsa-miR-197	MIMAT0000227	metabolic syndrome	DOID:14221	5A44	serum	24136779	-	association	qRT-PCR	PCR	Low-throughput	All these results suggested that the association between PA and MetS risk might partly depend on miR-126 and miR-197.	Associations between physical activity-related miRNAs and metabolic syndrome	2014	-
microRNA	Homo sapiens	hsa-miR-197-3p	MIMAT0000227	obesity	DOID:9970	5B81	serum	28638270	-	downregulation	qRT-PCR	PCR	Low-throughput	Our results support the clinical application of biomarkers in diagnosing early stage MetS, which will enable attenuation of disease progression before onset of irreversible complications.	Existence of a Strong Correlation of Biomarkers and miRNA in Females with Metabolic Syndrome and Obesity in a Population of West Virginia	2017	-
microRNA	Homo sapiens	hsa-miR-197-3p	MIMAT0000227	type 2 diabetes mellitus	DOID:9352	5A11	serum	28638270	-	downregulation	qRT-PCR	PCR	Low-throughput	Our results support the clinical application of biomarkers in diagnosing early stage MetS, which will enable attenuation of disease progression before onset of irreversible complications.	Existence of a Strong Correlation of Biomarkers and miRNA in Females with Metabolic Syndrome and Obesity in a Population of West Virginia	2017	-
microRNA	Homo sapiens	hsa-miR-1976	MIMAT0009451	obesity	DOID:9970	5B81	white blood	30089130	CD40	upregulation	microarray/qRT-PCR/luciferase assays	microarray;PCR;luciferase assay	Low-throughput	miR-612 and miR-1976 levels could be prospective biomarkers of response to specific weight-loss diets and might regulate the gene expression of TP53 and CD40.	Implication of miR-612 and miR-1976 in the regulation of TP53 and CD40 and their relationship in the response to specific weight-loss diets	2018	-
microRNA	Homo sapiens	hsa-miR-199a	MIMAT0000231	obesity	DOID:9970	5B81	adipose tissue	30279164	PRDM16/PGC-1α	upregulation	qPCR	PCR	Low-throughput	These observations reveal that the miR-199a/214 cluster is a key negative regulator of brown and beige fat development and thermogenesis.	Obesity-Associated miR-199a/214 Cluster Inhibits Adipose Browning via PRDM16-PGC-1α Transcriptional Network	2018	-
microRNA	Homo sapiens	hsa-miR-199a	MIMAT0000231	type 2 diabetes mellitus	DOID:9352	5A11	plasma	25084986	GLUT4	upregulation	RT-qPCR	PCR	Low-throughput	These results indicate that T2DM patients may have a high level miR-199a that reduce GLUT4 expression and contribute to the insulin resistance. Hence, miR-199a may be a novel biomarker for risk estimation and classification in T2DM patients.	MiR-199a is overexpressed in plasma of type 2 diabetes patients which contributes to type 2 diabetes by targeting GLUT4	2014	-
microRNA	Homo sapiens	hsa-miR-199a-3p	MIMAT0000232	obesity	DOID:9970	5B81	visceral adipose tissue	27279151	-	upregulation	RT-qPCR	PCR	Low-throughput	miR‑199a‑3p may represent a factor in the modulation of obesity‑associated IR and inflammatory responses.	Expression of miR-199a-3p in human adipocytes is regulated by free fatty acids and adipokines	2016	-
microRNA	Homo sapiens	hsa-miR-199a-3p	MIMAT0000232	obesity	DOID:9970	5B81	brown adipocyte	29753771	mTOR	downregulation	-	-	-	Our results point to a novel role for miR-199a-3p and its downstream effector mTOR in human brown adipocyte differentiation and maintenance of thermogenic characteristics, which can be manipulated as therapeutic targets against obesity and its related metabolic disorders.	miR-199a-3p regulates brown adipocyte differentiation through mTOR signalling pathway	2018	-
microRNA	Homo sapiens	hsa-miR-199a-3p	MIMAT0000232	type 2 diabetes mellitus	DOID:9352	5A11	peripheral blood	30233719	-	downregulation	RT-qPCR	PCR	Low-throughput	The results of the present study suggest that miR-199a-3p expression was reduced in patients with T2DM compared with healthy subjects and may be associated with vascular endothelial cell injury.	Reduced expression of microRNA-199a-3p is associated with vascular endothelial cell injury induced by type 2 diabetes mellitus	2018	-
microRNA	Homo sapiens	hsa-miR-199a-5p	MIMAT0000231	hypertension	DOID:10763	BA00	peripheral blood	30116316	AMPK/ULK1	upregulation	RT-qPCR/Western blotting	PCR;Immunoblotting	Low-throughput	The present study demonstrated that expression of miR-199a-5p is positively correlated with the severity of hypertension. Expression of miR-199a-5p aggravated vascular endothelial injury by inhibiting autophagy and promoting the apoptosis of HUVECs via downregulation of the AMPK/ULK1 signaling pathway.	MicroRNA-199a-5p aggravates primary hypertension by damaging vascular endothelial cells through inhibition of autophagy and promotion of apoptosis	2018	-
microRNA	Homo sapiens	hsa-miR-19a-3p	MIMAT0000073	type 2 diabetes mellitus	DOID:9352	5A11	blood	27666763	SOCS3	downregulation	RT-qPCR	PCR	Low-throughput	On the whole, the findings of this study suggest that miR‑19a‑3p plays an important role in β cell function, and that the miR-19a-3p/SOCS3 axis may become a potential therapeutic target for diabetes.	MicroRNA-19a-3p enhances the proliferation and insulin secretion, while it inhibits the apoptosis of pancreatic β cells via the inhibition of SOCS3	2016	-
microRNA	Homo sapiens	hsa-miR-19b	MIMAT0000074	hypo-HDL cholesterolemia	DOID:1387	5C81.Z	macrophage	25084135	ABCA1	association	qRT-PCR/luciferase reporter assay/Western blotting	PCR;Luciferase assay;Immunoblotting	Low-throughput	MiR-19b directly regulated the expression levels of endogenous ABCA1 in foam cells derived from human THP-1 macrophages and mouse peritoneal macrophages (MPMs) as determined by qRT-PCR and western blot.	MicroRNA-19b promotes macrophage cholesterol accumulation and aortic atherosclerosis by targeting ATP-binding cassette transporter A1	2014	-
microRNA	Homo sapiens	hsa-miR-19b-3p	MIMAT0000074	hypertension	DOID:10763	BA00	vascular smooth muscle	30690026	CTGF	downregulation	qRT-PCR	PCR	Low-throughput	These findings indicate that pathological cyclic stretch induces vascular remodeling by promoting VSMC proliferation via miR-19b-3p/CTGF pathway, and point to CTGF as a potential therapeutic target for hypertension.	CTGF regulates cyclic stretch-induced vascular smooth muscle cell proliferation via microRNA-19b-3p	2019	-
microRNA	Homo sapiens	hsa-miR-200a	MIMAT0000682	type 2 diabetes mellitus	DOID:9352	5A11	islet	25985365	p58IPK/Xiap/Trp53	upregulation	qPCR/luciferase reporter assay	PCR;luciferase assays	Low-throughput	Our results reveal a crucial role for the miR-200 family in beta cell survival and the pathophysiology of diabetes.	The microRNA-200 family regulates pancreatic beta cell survival in type 2 diabetes	2015	GSE58488
microRNA	Homo sapiens	hsa-miR-200b	MIMAT0000318	obesity	DOID:9970	5B81	gingival tissue	25630869	ZEB1/2/GATA2/KDR	upregulation	qRT-PCR	PCR	Low-throughput	The gingival tissue miRNA profile of obese patients, compared to that of normal weight patients, showed 13 upregulated and 22 downregulated miRNAs, among which miR-200b was validated by qRT-PCR to be significantly increased in obesity.	Upregulation of gingival tissue miR-200b in obese periodontitis subjects	2015	-
microRNA	Homo sapiens	hsa-miR-200b	MIMAT0000318	type 2 diabetes mellitus	DOID:9352	5A11	plasma	25814674	-	downregulation	qRT-PCR	PCR	Low-throughput	Quantitative real-time polymerase chain reaction validation confirmed decrease in circulating miR-191 and miR-200b levels in type 2 diabetic versus healthy controls.	Impairment of Wound Healing in Patients With Type 2 Diabetes Mellitus Influences Circulating MicroRNA Patterns via Inflammatory Cytokines	2015	GSE49885
microRNA	Homo sapiens	hsa-miR-200b	MIMAT0000318	type 2 diabetes mellitus	DOID:9352	5A11	islet	25985365	p58IPK/Xiap/Trp53	upregulation	qPCR/luciferase reporter assay	PCR;luciferase assays	Low-throughput	Our results reveal a crucial role for the miR-200 family in beta cell survival and the pathophysiology of diabetes.	The microRNA-200 family regulates pancreatic beta cell survival in type 2 diabetes	2015	GSE58488
microRNA	Homo sapiens	hsa-miR-200c	MIMAT0000617	type 2 diabetes mellitus	DOID:9352	5A11	islet	25985365	p58IPK/Xiap/Trp53	upregulation	qPCR/luciferase reporter assay	PCR;luciferase assays	Low-throughput	Our results reveal a crucial role for the miR-200 family in beta cell survival and the pathophysiology of diabetes.	The microRNA-200 family regulates pancreatic beta cell survival in type 2 diabetes	2015	GSE58488
microRNA	Homo sapiens	hsa-miR-203a-3p	MIMAT0000264	hyperlipidemia	DOID:1168	5C80.1	plasma	28347692	-	upregulation	qPCR/luciferase reporter assay	PCR;Luciferase assay	Low-throughput	Our findings highlight the plasma levels of miR-21-5p/203a-3p may serve as novel biomarkers to evaluate the degree of endothelial senescence in hyperlipidemia.	miR-21-5p/203a-3p promote ox-LDL-induced endothelial cell senescence through down-regulation of mitochondrial fission protein Drp1	2017	-
microRNA	Homo sapiens	hsa-miR-204-5p	MIMAT0000265	metabolic syndrome	DOID:14221	5A44	adipose tissue	23562819	ACACB	downregulation	RNA-seq/qRT-PCR	sequencing;PCR	High-throughput	We suggest a regulatory role for miR-204-5p which was predicted to inhibit acetyl coenzyme A carboxylase β, a key fatty acid oxidation enzyme that has been shown to play a role in regulating body fat and insulin resistance in adipose tissue.	Genetic regulation of human adipose microRNA expression and its consequences for metabolic traits	2013	GSE45159
microRNA	Homo sapiens	hsa-miR-204-5p	MIMAT0000265	obesity	DOID:9970	5B81	clear cell renal cell carcinoma tissues	27907930	-	association	real-time qPCR	PCR	Low-throughput	The link between miR-204-5p and ccRCC recurrence may be partially mediated by regulating the expression of targeted obesity-related genes.	MicroRNA profiling in clear cell renal cell carcinoma tissues potentially links tumorigenesis and recurrence with obesity	2017	-
microRNA	Homo sapiens	hsa-miR-204-5p	MIMAT0000265	hypertension	DOID:10763	BA00	serum	28565757	-	upregulation	RT-qPCR	PCR	Low-throughput	The results of the present study suggest that low levels of miR-204-5p may increase cell proliferation and reduce cell apoptosis with cell cycle changes in vitro. Therefore, serum miR-204-5p may be used as a notable biomarker for the diagnosis, prevention and treatment of PIH.	An exploratory study into the role of miR-204-5p in pregnancy-induced hypertension	2017	-
microRNA	Homo sapiens	hsa-miR-205-5p	MIMAT0000266	obesity	DOID:9970	5B81	adipose tissue	29280944	-	downregulation	next generation sequencing	sequencing;PCR	High-throughput	NGS-based miRNome analysis characterized changes of the miRNA profile of adipose tissue, which are associated with changes of weight possibly responsible for a differential regulation of molecular pathways in adipose tissue when the individual is obese and after the individual has lost weight.	NGS Reveals Molecular Pathways Affected by Obesity and Weight Loss-Related Changes in miRNA Levels in Adipose Tissue	2017	-
microRNA	Homo sapiens	hsa-miR-206	MIMAT0000462	obesity	DOID:9970	5B81	plasma	27551310	-	downregulation	RT-qPCR	PCR	Low-throughput	The validation by RT-qPCR in the individual plasma samples showed a twofold upregulation of miR-31-5p, a threefold upregulation of miR-2355-5p, and a 0.5-fold downregulation of miR-206 in OW/Ob as compared with NW.	Circulating microRNAs are deregulated in overweight/obese children: preliminary results of the I.Family study	2016	-
microRNA	Homo sapiens	hsa-miR-208a	MIMAT0000241	obesity	DOID:9970	5B81	plasma	30383229	-	differential expression	microarray/RT-qPCR	microarray;PCR	Low-throughput	Our study has provided evidence that the circulating miRNAs associated with various disorders are dysregulated in women who are obese. We also found that seven of these miRNAs showed levels comparable to those in lean controls after acute weight loss in women who are obese.	Acute Weight Loss Restores Dysregulated Circulating MicroRNAs in Individuals Who Are Obese	2019	-
microRNA	Homo sapiens	hsa-miR-208b	MIMAT0004960	hypertension	DOID:10763	BA00	peripheral blood	26984682	-	differential expression	RT-PCR	PCR	Low-throughput	Our findings provide new perspectives on the development of a new generation of biomarkers for the better monitoring of end-organ damage in hypertension.	Comparative microRNA profiling in relation to urinary albumin excretion in newly diagnosed hypertensive patients	2016	-
microRNA	Homo sapiens	hsa-miR-208b	MIMAT0004960	hypertension	DOID:10763	BA00	peripheral blood	26358152	-	upregulation	RT-PCR	PCR	Low-throughput	Our data reveal that miR-1, miR-133a, miR-26b, miR-208b, miR-499, and miR-21 show distinct expression profiles in hypertensive patients relative to healthy individuals and they are associated with clinical indices of left ventricular hypertrophy in hypertensive patients.	Hypertrophic and antihypertrophic microRNA levels in peripheral blood mononuclear cells and their relationship to left ventricular hypertrophy in patients with essential hypertension	2015	-
microRNA	Homo sapiens	hsa-miR-20a	MIMAT0000075	obesity	DOID:9970	5B81	blood	28920467	-	differential expression	real-time qPCR	PCR	Low-throughput	Our findings support the need for further studies to determine whether such changes are consistent across different populations and whether the identified microRNAs may represent novel biomarkers to predict the susceptibility and progression of obesity-related disorders.	Association of subcutaneous and visceral fat with circulating microRNAs in a middle-aged Japanese population	2018	-
microRNA	Homo sapiens	hsa-miR-20a	MIMAT0000075	type 2 diabetes mellitus	DOID:9352	5A11	serum	30835718	-	differential expression	qRT-PCR	PCR	Low-throughput	Serum miR-99b, miR-486-5p, miR-122-5p, and miR-20a were differentially expressed in patients with T2DM and DKD and should be evaluated further as potential biomarkers for DKD.	Evaluation of Serum microRNAs in Patients with Diabetic Kidney Disease: A Nested Case-Controlled Study and Bioinformatics Analysis	2019	-
microRNA	Homo sapiens	hsa-miR-20b	MIMAT0001413	obesity	DOID:9970	5B81	adipose tissue	30597763	-	differential expression	qPCR	PCR	Low-throughput	This study provides experimental evidence of the possible correlation between AT miR-20b-miR-296-Let-7f with obesity and T2D, which might involve vascular endothelial growth factor and WNT-dependent pathways that are regulated by six different genes, suggesting a novel signaling pathway that could be important for understanding the mechanisms underlying the AT dysfunction associated with obesity …	miR-20b, miR-296, and Let-7f Expression in Human Adipose Tissue is Related to Obesity and Type 2 Diabetes	2019	-
microRNA	Homo sapiens	hsa-miR-20b	MIMAT0001413	type 2 diabetes mellitus	DOID:9352	5A11	adipose tissue	30597763	-	upregulation	qPCR	PCR	Low-throughput	This study provides experimental evidence of the possible correlation between AT miR-20b-miR-296-Let-7f with obesity and T2D, which might involve vascular endothelial growth factor and WNT-dependent pathways that are regulated by six different genes, suggesting a novel signaling pathway that could be important for understanding the mechanisms underlying the AT dysfunction associated with obesity …	miR-20b, miR-296, and Let-7f Expression in Human Adipose Tissue is Related to Obesity and Type 2 Diabetes	2019	-
microRNA	Homo sapiens	hsa-miR-20b-5p	MIMAT0001413	type 2 diabetes mellitus	DOID:9352	5A11	serum	30552111	AKTIP/STAT3	differential expression	microarray	microarray	Low-throughput	In conclusion, exosome-derived extracellular miR-20b-5p is a circulating biomarker associated with type 2 diabetes that plays an intracellular role in modulating insulin-stimulated glucose metabolism via AKT signaling	Circulating Exosomal miR-20b-5p Is Elevated in Type 2 Diabetes and Could Impair Insulin Action in Human Skeletal Muscle	2019	-
microRNA	Homo sapiens	hsa-miR-21	MIMAT0000076	obesity	DOID:9970	5B81	whole blood	24037889	-	downregulation	RT-PCR	PCR	Low-throughput	Obesity significantly reduced the expression of miRNA-21, miRNA-27b, and miRNA-103.	Effects of polycystic ovary syndrome (PCOS), sex hormones, and obesity on circulating miRNA-21, miRNA-27b, miRNA-103, and miRNA-155 expression	2013	-
microRNA	Homo sapiens	hsa-miR-21	MIMAT0000076	metabolic syndrome	DOID:14221	5A44	venous blood	27353714	-	downregulation	qRT-PCR	PCR	Low-throughput	Expression levels of miR-21 were significantly decreased in the circulation of MetS subjects (OR=0.52, 95% CI: 0.29-0.92) compared with that of non-MetS subjects.	Circulating MicroRNA-21 is Downregulated in Patients with Metabolic Syndrome	2016	-
microRNA	Homo sapiens	hsa-miR-21	MIMAT0000076	obesity	DOID:9970	5B81	serum	29113498	-	downregulation	real-time qPCR	PCR	Low-throughput	A reduced level of miR-21 might associate with obesity and its related metabolic traits such as hyperinsulinaemia.	Decreased serum microRNA-21 level is associated with obesity in healthy and type 2 diabetic subjects	2018	-
microRNA	Homo sapiens	hsa-miR-21	MIMAT0000076	obesity	DOID:9970	5B81	peripheral blood	27370645	TNF-α/IL-6	downregulation	real-time qPCR	PCR	Low-throughput	These data suggest that miR-21 expression is decreased in PBMCs of obese subjects and reduced expression appears to be associated with increased secreted cytokine level in media of PBMCs of obese subjects.	Decreased expression of microRNA-21 is associated with increased cytokine production in peripheral blood mononuclear cells (PBMCs) of obese type 2 diabetic and non-diabetic subjects	2016	-
microRNA	Homo sapiens	hsa-miR-21	MIMAT0000076	obesity	DOID:9970	5B81	subcutaneous adipose tissue	21426570	-	upregulation	real-time qPCR	PCR	Low-throughput	In conclusion, we provide a preliminary analysis of miRNAs associated with primary cell in vitro adipogenesis and demonstrate that the inflammation-associated miRNA, mir-21 is up-regulated in subcutaneous adipose tissue in human obesity.	Gene-chip studies of adipogenesis-regulated microRNAs in mouse primary adipocytes and human obesity	2011	GSE27951
microRNA	Homo sapiens	hsa-miR-21	MIMAT0000076	type 2 diabetes mellitus	DOID:9352	5A11	adipose tissue	28447068	-	upregulation	real-time qPCR	PCR	Low-throughput	In conclusion, miR21 appears linked to insulin-resistance deterioration within its pathophysiologic progression from obesity to T2D.	MicroRNA 21 is up-regulated in adipose tissue of obese diabetic subjects	2017	-
microRNA	Homo sapiens	hsa-miR-21	MIMAT0000076	hypertension	DOID:10763	BA00	plasma	29615793	-	downregulation	RT-qPCR	PCR	Low-throughput	These results suggest that hypertension, independent of other cardiometabolic risk factors, adversely affects the circulating profile of a subset of vascular-related miRNAs that have been link to CVD risk and development.	Association between hypertension and circulating vascular-related microRNAs	2018	-
microRNA	Homo sapiens	hsa-miR-21	MIMAT0000076	hypertension	DOID:10763	BA00	plasma	26114349	-	upregulation	qRT-PCR	PCR	Low-throughput	In the absence of microalbuminuria, the increased miR-21 expression in patients with iCIMT made us conclude that this miRNA might be involved in the early stages of atherosclerotic process in hypertensive patients.	Circulating miR-21 and eNOS in subclinical atherosclerosis in patients with hypertension	2015	-
microRNA	Homo sapiens	hsa-miR-21	MIMAT0000076	hypertension	DOID:10763	BA00	peripheral blood	24284386	-	upregulation	qRT-PCR	PCR	Low-throughput	Our data provide important evidence that VSMC-modulating microRNAs are closely related to essential hypertension in humans and they may represent potential therapeutic targets in essential hypertension.	Differential expression of vascular smooth muscle-modulating microRNAs in human peripheral blood mononuclear cells: novel targets in essential hypertension	2014	-
microRNA	Homo sapiens	hsa-miR-21	MIMAT0000076	hypertension	DOID:10763	BA00	peripheral blood	26358152	-	upregulation	RT-PCR	PCR	Low-throughput	Our data reveal that miR-1, miR-133a, miR-26b, miR-208b, miR-499, and miR-21 show distinct expression profiles in hypertensive patients relative to healthy individuals and they are associated with clinical indices of left ventricular hypertrophy in hypertensive patients.	Hypertrophic and antihypertrophic microRNA levels in peripheral blood mononuclear cells and their relationship to left ventricular hypertrophy in patients with essential hypertension	2015	-
microRNA	Homo sapiens	hsa-miR-21	MIMAT0000076	hypo-HDL cholesterolemia	DOID:1387	5C81.Z	endothelial cells	24958738	-	downregulation	RT-PCR	PCR	Low-throughput	HDL-induced expression of miR-126, miR-21 and miR-222 was significantly reduced in ECs incubated with HDLNYHA when compared to HDLHealthy.	Exercise training improves high-density lipoprotein-mediated transcription of proangiogenic microRNA in endothelial cells	2015	-
microRNA	Homo sapiens	hsa-miR-21	MIMAT0000076	hypo-HDL cholesterolemia	DOID:1387	5C81.Z	serum	27785570	-	association	qRT-PCR	PCR	Low-throughput	We concluded that the increased serum miR-21 and Visfatin may be involved in the pathogenesis of ACS through promoting inflammation or may result from inflammatory responses to ACS. Furthermore, the potential role of miR-21 and Visfatin in plaque instability and inflammation warrants further investigations.	Association of serum microRNA-21 levels with Visfatin, inflammation, and acute coronary syndromes	2017	-
microRNA	Homo sapiens	hsa-miR-21	MIMAT0000076	hypo-HDL cholesterolemia	DOID:1387	5C81.Z	serum	27590242	-	association	qRT-PCR	PCR	Low-throughput	miR-21 expression levels were correlated positively with MMP-9, hs-CRP, and age and negatively with HDL-cholesterol	The role of serum levels of microRNA-21 and matrix metalloproteinase-9 in patients with acute coronary syndrome	2016	-
microRNA	Homo sapiens	hsa-miR-21	MIMAT0000076	obesity	DOID:9970	5B81	adipocyte	28627656	-	association	RT-qPCR	PCR	Low-throughput	Therefore, miR‑21 may be a key regulatory factor of obesity and obesity‑associated insulin resistance, and represents a potential therapeutic target for the treatment of these disorders.	Adipokines and free fatty acids regulate insulin sensitivity by increasing microRNA-21 expression in human mature adipocytes	2017	-
microRNA	Homo sapiens	hsa-miR-21	MIMAT0000076	obesity	DOID:9970	5B81	blood	28920467	-	differential expression	real-time qPCR	PCR	Low-throughput	Our findings support the need for further studies to determine whether such changes are consistent across different populations and whether the identified microRNAs may represent novel biomarkers to predict the susceptibility and progression of obesity-related disorders.	Association of subcutaneous and visceral fat with circulating microRNAs in a middle-aged Japanese population	2018	-
microRNA	Homo sapiens	hsa-miR-21	MIMAT0000076	obesity	DOID:9970	5B81	adipose tissue	19816956	TGFBR2	upregulation	RT-PCR/luciferase report assays/Western blotting	PCR;luciferase assay;Immunoblotting	Low-throughput	Our data are the first to demonstrate that the role of miR-21 in the adipogenic differentiation of hASCs is mediated through the modulation of TGF-beta signaling.	MiR-21 regulates adipogenic differentiation through the modulation of TGF-beta signaling in mesenchymal stem cells derived from human adipose tissue	2009	-
microRNA	Homo sapiens	hsa-miR-21	MIMAT0000076	hypertension	DOID:10763	BA00	plasma	25837765	-	upregulation	qRT-PCR	PCR	Low-throughput	We report for the first time a plasma miRNA profile for WCH patients and demonstrate a novel link between miRNA and WCH. These findings may reveal crucial insights into the development of WCH.	Differential expression of hypertension-associated microRNAs in the plasma of patients with white coat hypertension	2015	-
microRNA	Homo sapiens	hsa-miR-21	MIMAT0000076	hypertension	DOID:10763	BA00	renal cortex	22042811	-	differential expression	microarray/qRT-PCR/luciferase assays	microarray;PCR;Luciferase assay	Low-throughput	The observed downregulation of 2 miRNAs in hypertension could explain the elevation in intrarenal renin mRNA. Renin, CD36, and other mRNAs, as well as miRNAs and associated pathways identified in the present study, provide novel insights into hypertension etiology.	Gene expression profiling reveals renin mRNA overexpression in human hypertensive kidneys and a role for microRNAs	2011	GSE28260
microRNA	Homo sapiens	hsa-miR-21	MIMAT0000076	hyperlipidemia	DOID:1168	5C80.1	serum	24928089	-	upregulation	microarray	microarray	Low-throughput	These data show a statistically significant correlation of the analyzed miRNA with increased lipids, specifically with α- and β-lipoproteins, and CRP and IL-1β levels in HL and/or HG sera, suggesting a contribution of these miRNAs to the atherosclerotic process.	Analysis of circulating microRNAs that are specifically increased in hyperlipidemic and/or hyperglycemic sera	2014	-
microRNA	Homo sapiens	hsa-miR-210	MIMAT0000267	obesity	DOID:9970	5B81	adipose tissue	28496128	GPD1L	association	RT-qPCR/microarray/sequencing	PCR;microarray;sequencing	High-throughput	The results indicated that increased GPD1L in adipose tissue may have a significant therapeutic potential in reducing obesity and insulin resistance.	A Systems Genetics Approach Identified GPD1L and its Molecular Mechanism for Obesity in Human Adipose Tissue	2017	GSE32512
microRNA	Homo sapiens	hsa-miR-210-3p	MIMAT0000267	hypertension	DOID:10763	BA00	plasma	29153681	-	differential expression	RT-PCR	PCR	Low-throughput	The level of circulating exosomal total-miRNA and hsa-miR-210 was elevated in women with PE, and it was higher in the severe form. We showed that hsa-miR-210 is secreted via exosomes, which may have a role in the pathomechanism of the disease.	Various levels of circulating exosomal total-miRNA and miR-210 hypoxamiR in different forms of pregnancy hypertension	2017	GSE92669
microRNA	Homo sapiens	hsa-miR-212	MIMAT0000269	type 2 diabetes mellitus	DOID:9352	5A11	islet	26218441	GLP-1	upregulation	real-time qPCR	PCR	Low-throughput	GLP-1 increases the expression of miRNAs 132 and 212 via a cAMP/protein kinase A-dependent pathway in pancreatic β-cells. Overexpression of miR-132 or miR-212 enhances glucose and GLP-1-stimulated insulin secretion.	Induction of miR-132 and miR-212 Expression by Glucagon-Like Peptide 1 (GLP-1) in Rodent and Human Pancreatic β-Cells	2015	-
microRNA	Homo sapiens	hsa-miR-212	MIMAT0000269	hypertension	DOID:10763	BA00	heart	23712358	-	upregulation	microarray/RT-qPCR	microarray;PCR	Low-throughput	Taken together, these data suggest that miR-132 and miR-212 are involved in AngII induced hypertension, providing a new perspective in hypertensive disease mechanisms.	Angiotensin II regulates microRNA-132/-212 in hypertensive rats and humans	2013	-
microRNA	Homo sapiens	hsa-miR-21-3p	MIMAT0004494	hypertension	DOID:10763	BA00	plasma	29858071	ADRA2B	downregulation	qRT-PCR/luciferase reporter assay/Western blotting	PCR;Luciferase assay;Immunoblotting	Low-throughput	Our study is the first to identify a novel role and mechanism of miR-21-3p in blood pressure control and provides a possible strategy for hypertension therapy using rAAV-miR-21-3p.	Recombinant Adeno-Associated Virus-Mediated Delivery of MicroRNA-21-3p Lowers Hypertension	2018	-
microRNA	Homo sapiens	hsa-miR-214	MIMAT0000271	obesity	DOID:9970	5B81	adipose tissue	30279164	PRDM16/PGC-1α	upregulation	qPCR	PCR	Low-throughput	These observations reveal that the miR-199a/214 cluster is a key negative regulator of brown and beige fat development and thermogenesis.	Obesity-Associated miR-199a/214 Cluster Inhibits Adipose Browning via PRDM16-PGC-1α Transcriptional Network	2018	-
microRNA	Homo sapiens	hsa-miR-214-3p	MIMAT0000271	hypertension	DOID:10763	BA00	kidney	30049682	eNOS	upregulation	RNA-seq	sequencing	High-throughput	Renal miR-214-3p plays a functional and potentially genetic role in the development of hypertension, which might be mediated in part by targeting eNOS.	MicroRNA-214-3p in the Kidney Contributes to the Development of Hypertension	2018	-
microRNA	Homo sapiens	hsa-miR-215	MIMAT0000272	type 2 diabetes mellitus	DOID:9352	5A11	serum	30250222	-	upregulation	qRT-PCR	PCR	Low-throughput	In conclusion, circulating microRNAs -192 and -194 are potential biomarkers for risk of diabetes.	Circulating microRNAs -192 and -194 are associated with the presence and incidence of diabetes mellitus	2018	-
microRNA	Homo sapiens	hsa-miR-215-5p	MIMAT0000272	obesity	DOID:9970	5B81	plasma	30651891	-	downregulation	RT-qPCR	PCR	Low-throughput	Our work showed that several circulating miRNAs are differentially represented in overweight/low-grade obesity children and adolescents. Although causal pathways cannot be firmly inferred, it is conceivable that circulating miRNAs may be new biomarkers of early childhood obesity.	Circulating microRNAs are associated with early childhood obesity: results of the I.Family Study	2019	-
microRNA	Homo sapiens	hsa-miR-21-5p	MIMAT0000076	metabolic syndrome	DOID:14221	5A44	blood	30771749	-	upregulation	-	-	-	The expression of miR-21-5p, miR-122-5p, and miR-146a-5p was significantly higher in subjects with MetS than those without MetS.	Associations of blood levels of trace elements and heavy metals with metabolic syndrome in Chinese male adults with microRNA as mediators involved	2019	-
microRNA	Homo sapiens	hsa-miR-21-5p	MIMAT0000076	hypertension	DOID:10763	BA00	plasma	26798072	-	downregulation	qRT-PCR	PCR	Low-throughput	This study showed that hsa-miR-92a-3p, hsa-miR-21-5p, and hsa-miR-16-5p may be used as normalizers for plasma miRNA expression data in essential hypertension studies.	Identification of Suitable Endogenous Normalizers for qRT-PCR Analysis of Plasma microRNA Expression in Essential Hypertension	2016	-
microRNA	Homo sapiens	hsa-miR-21-5p	MIMAT0000076	hyperlipidemia	DOID:1168	5C80.1	plasma	28347692	Drp1	upregulation	qPCR/luciferase reporter assay	PCR;Luciferase assay	Low-throughput	Our findings highlight the plasma levels of miR-21-5p/203a-3p may serve as novel biomarkers to evaluate the degree of endothelial senescence in hyperlipidemia.	miR-21-5p/203a-3p promote ox-LDL-induced endothelial cell senescence through down-regulation of mitochondrial fission protein Drp1	2017	-
microRNA	Homo sapiens	hsa-miR-217	MIMAT0000274	type 2 diabetes mellitus	DOID:9352	5A11	serum	27522360	-	upregulation	real-time qPCR	PCR	Low-throughput	Our findings suggest that microRNA-217 may have an association with the development of proteinuria in type 2 diabetes patients. Serum microRNA-217 may be involved in the development of diabetic kidney disease by promoting chronic inflammation, renal fibrosis, and angiogenesis.	Changes of serum Mir-217 and the correlation with the severity in type 2 diabetes patients with different stages of diabetic kidney disease	2017	-
microRNA	Homo sapiens	hsa-miR-22	MIMAT0000077	hypertension	DOID:10763	BA00	platelet	30375479	-	downregulation	RT-PCR	PCR	Low-throughput	In conclusion, platelet miR-22 and miR-223 levels are reduced according to the hypertension status and they are negatively correlated with SBP levels. Platelet miR levels are also related to the presence of overt cardiovascular disease in this population.	Platelet microRNAs in hypertensive patients with and without cardiovascular disease	2019	-
microRNA	Homo sapiens	hsa-miR-221	MIMAT0000278	obesity	DOID:9970	5B81	plasma	30248300	-	upregulation	-	-	-	These findings indicate that acute aerobic exercise elicits a higher elevation in plasma level of inflammatory ci-miRNAs in obese than normal-weight individuals, irrespective of cardiorespiratory fitness and indicator of metabolic syndrome (HOMA-IR).	Circulating microRNAs are upregulated following acute aerobic exercise in obese individuals	2018	-
microRNA	Homo sapiens	hsa-miR-221	MIMAT0000278	obesity	DOID:9970	5B81	blood	23396142	-	downregulation	microarray/RT-qPCR	microarray;PCR	Low-throughput	Circulating miRNAs are deregulated in severe obesity. Weight loss-induced changes in this profile and the study of in silico targets support this observation and suggest a potential mechanistic relevance.	Targeting the circulating microRNA signature of obesity	2013	-
microRNA	Homo sapiens	hsa-miR-221	MIMAT0000278	metabolic syndrome	DOID:14221	5A44	serum	24093444	-	upregulation	qRT-PCR	PCR	Low-throughput	The circulating levels of let-7 g and miR-221 displayed a female-specific elevation in individuals with metabolic syndrome.	Circulating microRNAs have a sex-specific association with metabolic syndrome	2013	-
microRNA	Homo sapiens	hsa-miR-221	MIMAT0000278	obesity	DOID:9970	5B81	subcutaneous adipose tissue	23756832	ADIPOR1/ETS1	association	microarray/qRT-PCR/luciferase assays	microarray;PCR;luciferase assay;Immunoblotting	Low-throughput	Our data suggest that miR-221 may contribute to the development of the insulin resistance that typically accompanies obesity, by affecting PPAR signalling pathways and by directly downregulating ADIPOR1 and ETS1.	Human adipose microRNA-221 is upregulated in obesity and affects fat metabolism downstream of leptin and TNF-α	2013	-
microRNA	Homo sapiens	hsa-miR-221	MIMAT0000278	obesity	DOID:9970	5B81	adipose tissue	23867206	-	downregulation	real-time PCR/Enzyme-linked immunosorbent assay	PCR;Immunoblotting	Low-throughput	Our results support the link between miR-221 and obesity development as well as obesity related inflammatory status.	Decreased microRNA-221 is associated with high levels of TNF-α in human adipose tissue-derived mesenchymal stem cells from obese woman	2013	-
microRNA	Homo sapiens	hsa-miR-221	MIMAT0000278	obesity	DOID:9970	5B81	plasma	23928666	-	downregulation	RT-PCR	PCR	Low-throughput	This study provides the first evidence that circulating miRNAs are deregulated in prepubertal obese children. Thus, the very early detection of an abnormal circulating miRNA profile may be a promising strategy to identify obese children who may suffer from metabolic abnormalities.	Changes in circulating microRNAs are associated with childhood obesity	2013	-
microRNA	Homo sapiens	hsa-miR-221	MIMAT0000278	obesity	DOID:9970	5B81	muscle tissue	24130336	AdipoR1	association	qRT-PCR/luciferase reporter assay/Western blotting	PCR;luciferase assay;Immunoblotting	Low-throughput	Given that adiponectin is reduced in obesity, induction of AdipoR1 could potentially enhance adiponectin beneficial effects and ameliorate insulin resistance and diabetes.	RNA-binding protein PTB and microRNA-221 coregulate AdipoR1 translation and adiponectin signaling	2014	-
microRNA	Homo sapiens	hsa-miR-221-3p	MIMAT0000278	obesity	DOID:9970	5B81	serum	28638270	-	downregulation	qRT-PCR	PCR	Low-throughput	Our results support the clinical application of biomarkers in diagnosing early stage MetS, which will enable attenuation of disease progression before onset of irreversible complications.	Existence of a Strong Correlation of Biomarkers and miRNA in Females with Metabolic Syndrome and Obesity in a Population of West Virginia	2017	-
microRNA	Homo sapiens	hsa-miR-221-3p	MIMAT0000278	type 2 diabetes mellitus	DOID:9352	5A11	serum	28638270	-	downregulation	qRT-PCR	PCR	Low-throughput	Our results support the clinical application of biomarkers in diagnosing early stage MetS, which will enable attenuation of disease progression before onset of irreversible complications.	Existence of a Strong Correlation of Biomarkers and miRNA in Females with Metabolic Syndrome and Obesity in a Population of West Virginia	2017	-
microRNA	Homo sapiens	hsa-miR-221-3p	MIMAT0000278	obesity	DOID:9970	5B81	adipose tissue	28938482	ANGPTL8	association	real-time PCR/luciferase reporter assay/Western blotting	PCR;luciferase assay;Immunoblotting	Low-throughput	The inflammation-induced miR-221-3p regulates ANGPTL8 expression in adipocytes. This miRNA impact may become especially prominent under pathologic conditions such as morbid obesity, putatively contributing to the impaired AT lipid metabolism in metabolic disease.	MicroRNA-221-3p Regulates Angiopoietin-Like 8 (ANGPTL8) Expression in Adipocytes	2017	-
microRNA	Homo sapiens	hsa-miR-221-3p	MIMAT0000278	hypo-HDL cholesterolemia	DOID:1387	5C81.Z	peripheral blood	30115076	-	downregulation	RT-qPCR	PCR	Low-throughput	The inverted pattern of circulating miR-221-3p and miR-222-3p are potentially clinically actionable signature for molecular pathology in isolated low HDL-C phenotype.	The inverted pattern of circulating miR-221-3p and miR-222-3p associated with isolated low HDL-C phenotype	2018	GSE94605
microRNA	Homo sapiens	hsa-miR-222	MIMAT0000279	obesity	DOID:9970	5B81	plasma	30248300	-	upregulation	-	-	-	These findings indicate that acute aerobic exercise elicits a higher elevation in plasma level of inflammatory ci-miRNAs in obese than normal-weight individuals, irrespective of cardiorespiratory fitness and indicator of metabolic syndrome (HOMA-IR).	Circulating microRNAs are upregulated following acute aerobic exercise in obese individuals	2018	-
microRNA	Homo sapiens	hsa-miR-222	MIMAT0000279	obesity	DOID:9970	5B81	blood	23396142	-	upregulation	microarray/RT-qPCR	microarray;PCR	Low-throughput	Circulating miRNAs are deregulated in severe obesity. Weight loss-induced changes in this profile and the study of in silico targets support this observation and suggest a potential mechanistic relevance.	Targeting the circulating microRNA signature of obesity	2013	-
microRNA	Homo sapiens	hsa-miR-222	MIMAT0000279	obesity	DOID:9970	5B81	plasma	30309709		upregulation	RT-PCR/Immunoassy analysis	PCR;Immunoblotting	Low-throughput	Circulating miRNAs showed significant association with plasma levels of adipokines; adiponectin, leptin, and L/A ratios in adolescents with severe obesity. The study provides that regulation of miRNAs expression is associated with adipokines, and other related MS metabolic factors.	Circulating microRNAs and adipokines as markers of metabolic syndrome in adolescents with obesity	2018	-
microRNA	Homo sapiens	hsa-miR-222	MIMAT0000279	obesity	DOID:9970	5B81	plasma	28342299	-	association	qRT-PCR	PCR	Low-throughput	The findings provide evidence that circulating miRNAs play important roles in obesity and weight gain and suggest new targets for understanding the mechanisms of weight gain and developing weight loss intervention strategies.	Plasma MicroRNA signature predicting weight gain among Mexican-American women	2017	-
microRNA	Homo sapiens	hsa-miR-222	MIMAT0000279	hypo-HDL cholesterolemia	DOID:1387	5C81.Z	endothelial cells	24958738	-	downregulation	RT-PCR	PCR	Low-throughput	HDL-induced expression of miR-126, miR-21 and miR-222 was significantly reduced in ECs incubated with HDLNYHA when compared to HDLHealthy.	Exercise training improves high-density lipoprotein-mediated transcription of proangiogenic microRNA in endothelial cells	2015	-
microRNA	Homo sapiens	hsa-miR-222-3p	MIMAT0000279	hypo-HDL cholesterolemia	DOID:1387	5C81.Z	peripheral blood	30115076	-	upregulation	RT-qPCR	PCR	Low-throughput	The inverted pattern of circulating miR-221-3p and miR-222-3p are potentially clinically actionable signature for molecular pathology in isolated low HDL-C phenotype.	The inverted pattern of circulating miR-221-3p and miR-222-3p associated with isolated low HDL-C phenotype	2018	GSE94605
microRNA	Homo sapiens	hsa-miR-223	MIMAT0000280	obesity	DOID:9970	5B81	serum	25842981	-	downregulation	qRT-PCR	PCR	Low-throughput	The findings in this study suggest that miR-223 is a factor of obesity. The level of miR-223 in the serum can be used as a biomarker of obesity and therapeutic response.	Circulating microRNA-223 as a potential biomarker for obesity	2015	-
microRNA	Homo sapiens	hsa-miR-223	MIMAT0000280	obesity	DOID:9970	5B81	-	25637573	-	downregulation	-	-	-	Obesity leads to alterations in miRNA expressions and miRNA-143 and -223s can be used as biomarkers for the metabolic changes in obesity.	MicroRNA -143 and -223 in obesity	2015	-
microRNA	Homo sapiens	hsa-miR-223	MIMAT0000280	obesity	DOID:9970	5B81	high-density lipoproteins	26962854	-	downregulation	real-time qPCR	PCR	Low-throughput	HDL-associated miR-223 levels are significantly decreased after HP diet-induced weight loss in overweight and obese males. This is the first study reporting changes in HDL-associated miRNA levels with diet-induced weight loss.	High-Density Lipoprotein-Associated miR-223 Is Altered after Diet-Induced Weight Loss in Overweight and Obese Males	2016	-
microRNA	Homo sapiens	hsa-miR-223	MIMAT0000280	type 2 diabetes mellitus	DOID:9352	5A11	peripheral blood	26717922	FAM5C	downregulation	real-time PCR/luciferase reporter assays	PCR;luciferase assays	Low-throughput	The expression of miR-223-3p was negatively correlated with FAM5C mRNA in all patients and healthy controls. Co-transfection of miR-223-3p plasmid with FAM5C 3'UTR dual-luciferase plasmid significantly inhibited the luciferase activity (P < 0.01). FAM5C, but not miR-223, is a risk factor for CI in type 2 DM patients.	The Expression of microRNA-223 and FAM5C in Cerebral Infarction Patients with Diabetes Mellitus	2017	-
microRNA	Homo sapiens	hsa-miR-223	MIMAT0000280	type 2 diabetes mellitus	DOID:9352	5A11	platelet	26175178	IRS-1/P2Y12	downregulation	-	-	-	In conclusion, hyperglycemia may activate platelets through miR-144 and miR-223 to downregulate IRS-1 and upregulate P2Y12 expression in the platelets of T2DM patients through an IRS-1-PI3K-Akt signaling. Low platelet and plasma miR-223 expression in addition to high platelet and plasma miR-144 expression are risk factors for ischemic stroke in T2DM patients.	Biomarkers Associated with Ischemic Stroke in Diabetes Mellitus Patients	2016	-
microRNA	Homo sapiens	hsa-miR-223	MIMAT0000280	hypertension	DOID:10763	BA00	platelet	30375479	-	downregulation	RT-PCR	PCR	Low-throughput	In conclusion, platelet miR-22 and miR-223 levels are reduced according to the hypertension status and they are negatively correlated with SBP levels. Platelet miR levels are also related to the presence of overt cardiovascular disease in this population.	Platelet microRNAs in hypertensive patients with and without cardiovascular disease	2019	-
microRNA	Homo sapiens	hsa-miR-223	MIMAT0000280	hypo-HDL cholesterolemia	DOID:1387	5C81.Z	hepatocyte	23459944	SR-BI	association	RT-PCR/luciferase report assays/Western blotting	PCR;Luciferase assay;Immunoblotting	Low-throughput	These data suggest that miR-185, miR-96, and miR-223 may repress selective HDL-C uptake through the inhibition of SR-BI in human hepatic cells, implying a novel mode of regulation of hepatic SR-BI and an important role of miRNAs in modulating cholesterol metabolism.	MicroRNAs 185, 96, and 223 repress selective high-density lipoprotein cholesterol uptake through posttranscriptional inhibition	2013	-
microRNA	Homo sapiens	hsa-miR-223	MIMAT0000280	hypo-HDL cholesterolemia	DOID:1387	5C81.Z	serum	26962854	-	downregulation	real-time qPCR	PCR	Low-throughput	HDL-associated miR-223 levels are significantly decreased after HP diet-induced weight loss in overweight and obese males. This is the first study reporting changes in HDL-associated miRNA levels with diet-induced weight loss.	High-Density Lipoprotein-Associated miR-223 Is Altered after Diet-Induced Weight Loss in Overweight and Obese Males	2016	-
microRNA	Homo sapiens	hsa-miR-223	MIMAT0000280	hypo-HDL cholesterolemia	DOID:1387	5C81.Z	liver	25246565	SR-BI	upregulation	real-time PCR/luciferase reporter assay/Western blotting	PCR;Luciferase assay;Immunoblotting	Low-throughput	We identified a critical role for miR-223 in systemic cholesterol regulation by coordinated posttranscriptional control of multiple genes in lipoprotein and cholesterol metabolism.	MicroRNA-223 coordinates cholesterol homeostasis	2014	-
microRNA	Homo sapiens	hsa-miR-223	MIMAT0000280	type 2 diabetes mellitus	DOID:9352	5A11	platelet	27975100	P2RY12/SELP	downregulation	RT-qPCR	PCR	Low-throughput	Overall, miR-223, miR-26b, miR-126 and miR-140 are expressed at a lower level in platelets and MKs in DM2 causing upregulation of P2RY12 and SELP mRNAs that may contribute to adverse platelet function.	Hyperglycaemia suppresses microRNA expression in platelets to increase P2RY12 and SELP levels in type 2 diabetes mellitus	2017	-
microRNA	Homo sapiens	hsa-miR-223-3p	MIMAT0000280	obesity	DOID:9970	5B81	visceral adipose tissue	27812198	TLR4/FBXW7	upregulation	qPCR/Immunoblotting	PCR;Immunoblotting	Low-throughput	We concluded that the abundance of miR-223 in macrophages significantly modulates macrophage phenotype / activation state and response to stimuli via effects on the TLR4/FBXW7 axis.	Visceral Adipose MicroRNA 223 Is Upregulated in Human and Murine Obesity and Modulates the Inflammatory Phenotype of Macrophages	2016	-
microRNA	Homo sapiens	hsa-miR-22-3p	MIMAT0000077	obesity	DOID:9970	5B81	visceral adipose tissue	27480132	SIRT1	association	real-time qPCR	PCR	Low-throughput	We observed obesity-associated downregulation of SIRT1 and upregulation of SIRT7 mRNA levels that were not associated with the methylation status of their promoters. We found a negative correlation between mRNA levels of SIRT1 in VAT of obese individuals and SIRT7 in VAT of the normal-weight subjects and expression of the relevant miRNAs.	SIRT1 and SIRT7 expression in adipose tissues of obese and normal-weight individuals is regulated by microRNAs but not by methylation status	2016	-
microRNA	Homo sapiens	hsa-miR-2355-5p	MIMAT0017950	obesity	DOID:9970	5B81	plasma	27551310	-	upregulation	RT-qPCR	PCR	Low-throughput	The validation by RT-qPCR in the individual plasma samples showed a twofold upregulation of miR-31-5p, a threefold upregulation of miR-2355-5p, and a 0.5-fold downregulation of miR-206 in OW/Ob as compared with NW.	Circulating microRNAs are deregulated in overweight/obese children: preliminary results of the I.Family study	2016	-
microRNA	Homo sapiens	hsa-miR-23a	MIMAT0000078	metabolic syndrome	DOID:14221	5A44	blood	23032062	-	association	microarray/RT-qPCR	microarray;PCR	Low-throughput	We have identified miR-197, miR-23a, and miR-509-5p as potential contributors of dyslipidemia in metabolic syndrome (correlation with body mass index; P = 0.029, 0.021, and 0.042, respectively) and miR-130a and miR-195 as contributors of hypertension (correlation with blood pressure; P = 0.019 and 0.045, respectively).	Circulating miRNA profiles in patients with metabolic syndrome	2012	-
microRNA	Homo sapiens	hsa-miR-23a	MIMAT0000078	type 2 diabetes mellitus	DOID:9352	5A11	serum	24981880	-	downregulation	qRT-PCR	PCR	Low-throughput	These results revealed that serum miR-23a was a valuable biomarker for early detection of T2D and pre-diabetes with NGT.	Serum miR-23a, a potential biomarker for diagnosis of pre-diabetes and type 2 diabetes	2014	-
microRNA	Homo sapiens	hsa-miR-23a-3p	MIMAT0000078	obesity	DOID:9970	5B81	serum	28638270	-	downregulation	qRT-PCR	PCR	Low-throughput	Our results support the clinical application of biomarkers in diagnosing early stage MetS, which will enable attenuation of disease progression before onset of irreversible complications.	Existence of a Strong Correlation of Biomarkers and miRNA in Females with Metabolic Syndrome and Obesity in a Population of West Virginia	2017	-
microRNA	Homo sapiens	hsa-miR-23a-3p	MIMAT0000078	type 2 diabetes mellitus	DOID:9352	5A11	serum	28638270	-	downregulation	qRT-PCR	PCR	Low-throughput	Our results support the clinical application of biomarkers in diagnosing early stage MetS, which will enable attenuation of disease progression before onset of irreversible complications.	Existence of a Strong Correlation of Biomarkers and miRNA in Females with Metabolic Syndrome and Obesity in a Population of West Virginia	2017	-
microRNA	Homo sapiens	hsa-miR-23a-3p	MIMAT0000078	obesity	DOID:9970	5B81	serum	29409019	PTEN/S6K	downregulation	real-time PCR/luciferase reporter assay/Western blotting	PCR;luciferase assay;Immunoblotting	Low-throughput	miR-181a-5p and miR-23a-3p may prevent TNFα-induced IR in adipocytes through modulation of PTEN and S6K expression.	Altered Expression of miR-181a-5p and miR-23a-3p Is Associated With Obesity and TNFα-Induced Insulin Resistance	2018	-
microRNA	Homo sapiens	hsa-miR-23b	MIMAT0000418	obesity	DOID:9970	5B81	visceral adipose tissue	25518011	-	upregulation	qRT-PCR	PCR	Low-throughput	These data show that visceral adipocytes shed exosomal-mediators predicted to regulate key end-organ inflammatory and fibrotic signaling pathways.	Adipocyte-derived exosomal miRNAs: a novel mechanism for obesity-related disease	2015	GSE50574
microRNA	Homo sapiens	hsa-miR-24	MIMAT0000080	obesity	DOID:9970	5B81	adipose tissue	29721017	SFRP4	upregulation	qRT-PCR	PCR	Low-throughput	This study suggests a novel association between the elevated levels of miRNAs miR-24, miR-30d, and miR-146a (apparently coregulated) and the level of SFRP4 transcript in AbdAT of subjects with obesity and T2DM.	Elevated and Correlated Expressions of miR-24, miR-30d, miR-146a, and SFRP-4 in Human Abdominal Adipose Tissue Play a Role in Adiposity and Insulin Resistance	2018	-
microRNA	Homo sapiens	hsa-miR-24	MIMAT0000080	type 2 diabetes mellitus	DOID:9352	5A11	adipose tissue	29721017	SFRP4	upregulation	qPCR	PCR	Low-throughput	This study suggests a novel association between the elevated levels of miRNAs miR-24, miR-30d, and miR-146a (apparently coregulated) and the level of SFRP4 transcript in AbdAT of subjects with obesity and T2DM.	Elevated and Correlated Expressions of miR-24, miR-30d, miR-146a, and SFRP-4 in Human Abdominal Adipose Tissue Play a Role in Adiposity and Insulin Resistance	2018	-
microRNA	Homo sapiens	hsa-miR-24	MIMAT0000080	type 2 diabetes mellitus	DOID:9352	5A11	plasma	24497980	-	differential expression	real-time qPCR	PCR	Low-throughput	This study suggests that the association between plasma miR-144 expression and T2D differs between Swedes and Iraqis.	Determination of 14 circulating microRNAs in Swedes and Iraqis with and without diabetes mellitus type 2	2014	-
microRNA	Homo sapiens	hsa-miR-26a	MIMAT0000082	obesity	DOID:9970	5B81	liver	25961460	-	downregulation	qRT-PCR	PCR	Low-throughput	These findings reveal miR-26a as a regulator of liver metabolism and suggest miR-26a should be further explored as a potential target for the treatment of T2D.	MicroRNA-26a regulates insulin sensitivity and metabolism of glucose and lipids	2015	-
microRNA	Homo sapiens	hsa-miR-26a	MIMAT0000082	obesity	DOID:9970	5B81	mesenchymal stem cells	28068868	PTEN/Cyclin E1/CDK6	upregulation	microarray	microarray	Low-throughput	These results point to the regulatory role of miR-26a and its target genes PTEN, Cyclin E1, and CDK6 in adipogenic differentiation of AF-MSCs, providing a basis for understanding the mechanisms of fat cell development and obesity.	miR-26a Mediates Adipogenesis of Amniotic Fluid Mesenchymal Stem/Stromal Cells via PTEN, Cyclin E1, and CDK6	2017	-
microRNA	Homo sapiens	hsa-miR-26a	MIMAT0000082	obesity	DOID:9970	5B81	white adipose tissue	24375761	ADAM17	upregulation	qPCR/Luciferase reporter assays /Western blot	PCR;luciferase assay;Immunoblotting	Low-throughput	These results point to a novel, critical role for the miR-26 family and its downstream effector ADAM17 in human adipocyte differentiation by promoting characteristics of energy-dissipating thermogenic adipocytes.	MicroRNA-26 family is required for human adipogenesis and drives characteristics of brown adipocytes	2014	-
microRNA	Homo sapiens	hsa-miR-26a	MIMAT0000082	type 2 diabetes mellitus	DOID:9352	5A11	liver	25961460	-	downregulation	qRT-PCR	PCR	Low-throughput	These findings reveal miR-26a as a regulator of liver metabolism and suggest miR-26a should be further explored as a potential target for the treatment of T2D.	MicroRNA-26a regulates insulin sensitivity and metabolism of glucose and lipids	2015	-
microRNA	Homo sapiens	hsa-miR-26b	MIMAT0000083	obesity	DOID:9970	5B81	preadipocyte	26016996	cyclin D2	association	RT-qPCR/Western blotting	PCR;Immunoblotting	Low-throughput	These results demonstrated that miR‑26b promoted differentiation and, at least party by targeting cyclin D2, attenuated cell proliferation via arresting the G1/S transition.	Obesity-associated microRNA-26b regulates the proliferation of human preadipocytes via arrest of the G1/S transition	2015	-
microRNA	Homo sapiens	hsa-miR-26b	MIMAT0000083	obesity	DOID:9970	5B81	white adipose tissue	24375761	ADAM17	upregulation	qPCR/Luciferase reporter assays /Western blot	PCR;luciferase assay;Immunoblotting	Low-throughput	These results point to a novel, critical role for the miR-26 family and its downstream effector ADAM17 in human adipocyte differentiation by promoting characteristics of energy-dissipating thermogenic adipocytes.	MicroRNA-26 family is required for human adipogenesis and drives characteristics of brown adipocytes	2014	-
microRNA	Homo sapiens	hsa-miR-26b	MIMAT0000083	type 2 diabetes mellitus	DOID:9352	5A11	plasma	27975100	P2RY12/SELP	downregulation	RT-qPCR	PCR	Low-throughput	Overall, miR-223, miR-26b, miR-126 and miR-140 are expressed at a lower level in platelets and MKs in DM2 causing upregulation of P2RY12 and SELP mRNAs that may contribute to adverse platelet function.	Hyperglycaemia suppresses microRNA expression in platelets to increase P2RY12 and SELP levels in type 2 diabetes mellitus	2017	-
microRNA	Homo sapiens	hsa-miR-26b	MIMAT0000083	hypertension	DOID:10763	BA00	peripheral blood	26358152	-	downregulation	RT-PCR	PCR	Low-throughput	Our data reveal that miR-1, miR-133a, miR-26b, miR-208b, miR-499, and miR-21 show distinct expression profiles in hypertensive patients relative to healthy individuals and they are associated with clinical indices of left ventricular hypertrophy in hypertensive patients.	Hypertrophic and antihypertrophic microRNA levels in peripheral blood mononuclear cells and their relationship to left ventricular hypertrophy in patients with essential hypertension	2015	-
microRNA	Homo sapiens	hsa-miR-26b	MIMAT0000083	obesity	DOID:9970	5B81	preadipocyte	24807789	-	association	qPCR	PCR	Low-throughput	Therefore, miR-26b may be an important mediator in the development of obesity‑associated insulin resistance.	Expression of microRNA-26b, an obesity-related microRNA, is regulated by free fatty acids, glucose, dexamethasone and growth hormone in human adipocytes	2014	-
microRNA	Homo sapiens	hsa-miR-26b	MIMAT0000083	obesity	DOID:9970	5B81	preadipocyte	24140453	-	upregulation	-	-	-	Taken together, these data indicate that miR-26b may be involved in adipogenesis and could be targeted for therapeutic intervention in obesity.	The role of microRNA-26b in human adipocyte differentiation and proliferation	2014	-
microRNA	Homo sapiens	hsa-miR-26b	MIMAT0000083	obesity	DOID:9970	5B81	visceral adipose tissue	25999046	PTEN	downregulation	qRT-PCR/luciferase reporter assay/Western blotting	PCR;luciferase assay;Immunoblotting	Low-throughput	Decreased miR-26b expression in VAT may be involved in obesity-related IR by interrupting the PTEN/PI3K/AKT pathway.	MiR-26b modulates insulin sensitivity in adipocytes by interrupting the PTEN/PI3K/AKT pathway.	2015	-
microRNA	Homo sapiens	hsa-miR-26b	MIMAT0000083	obesity	DOID:9970	5B81	preadipocyte	23275201	-	differential expression	-	-	-	These results suggest that the expression of hsa-miR-26b is affected by TNF-α, leptin and resistin and that hsa-miR-26b may be an important mediator in regulating the obesity-related insulin sensitivity and inflammatory responses.	Modulation of hsa-miR-26b levels following adipokine stimulation	2013	-
microRNA	Homo sapiens	hsa-miR-26b-5p	MIMAT0000083	hypertension	DOID:10763	BA00	serum	29069223	-	upregulation	RT-PCR	PCR	Low-throughput	RT-PCR analysis of serum samples confirmed that miR-7-5p and miR-26b-5p were upregulated in the serum of LVH hypertensive patients compared with healthy subjects. Our findings suggest that these miRNAs may play a role in the pathogenesis of hypertensive LVH and may represent novel biomarkers for this disease.	MicroRNA profiling identifies miR-7-5p and miR-26b-5p as differentially expressed in hypertensive patients with left ventricular hypertrophy	2017	-
microRNA	Homo sapiens	hsa-miR-27	MIMAT0000084	hypo-HDL cholesterolemia	DOID:1387	5C81.Z	blood	26223376	-	association	real-time qPCR	PCR	Low-throughput	Low levels of miR-335, miR-143 and miR-758, and high levels of miR-27, miR-378, miR-33 and miR-370 may have been responsible for elevated triglycerides and low-density lipoprotein (LDL-C) levels, and low level of high-density lipoprotein (HDL-C) in obese subjects. Therefore, miRNAs may be a good novel biomarker for childhood obesity.	The investigation of circulating microRNAs associated with lipid metabolism in childhood obesity	2016	-
microRNA	Homo sapiens	hsa-miR-27	MIMAT0000084	obesity	DOID:9970	5B81	blood	26223376	-	upregulation	real-time qPCR	PCR	Low-throughput	Our findings showed that a significant association is present between circulating miR-370, miR-33, miR-378, miR-27, miR-335, miR-143 and miR-758 values, and childhood obesity. Low levels of miR-335, miR-143 and miR-758, and high levels of miR-27, miR-378, miR-33 and miR-370 may have been responsible for elevated triglycerides and low-density lipoprotein (LDL-C) levels, and low level of high-densi…	The investigation of circulating microRNAs associated with lipid metabolism in childhood obesity	2016	-
microRNA	Homo sapiens	hsa-miR-27a	MIMAT0000084	obesity	DOID:9970	5B81	blood	28920467	-	differential expression	real-time qPCR	PCR	Low-throughput	Our findings support the need for further studies to determine whether such changes are consistent across different populations and whether the identified microRNAs may represent novel biomarkers to predict the susceptibility and progression of obesity-related disorders.	Association of subcutaneous and visceral fat with circulating microRNAs in a middle-aged Japanese population	2018	-
microRNA	Homo sapiens	hsa-miR-27a	MIMAT0000084	obesity	DOID:9970	5B81	visceral adipose tissue	24690978	LEPR	upregulation	RT-PCR	PCR	Low-throughput	MiRNA-27a had a higher expression in the omentum of the obese patients and there was also a correlation in the expression of miRNA-145 and LEPR in the omentum of this group.	The expression of LEP, LEPR, IGF1 and IL10 in obesity and the relationship with microRNAs	2014	-
microRNA	Homo sapiens	hsa-miR-27a	MIMAT0000084	type 2 diabetes mellitus	DOID:9352	5A11	-	27300034	-	association	PCR-RFLP	PCR	Low-throughput	Our study shows that rs895819 in hsa-mir-27a is associated with T2DM susceptibility and that the C allele conveyed a protective role against T2DM.	The pre-mir-27a variant rs895819 may contribute to type 2 diabetes mellitus susceptibility in an Iranian cohort	2016	-
microRNA	Homo sapiens	hsa-miR-27a	MIMAT0000084	type 2 diabetes mellitus	DOID:9352	5A11	blood	23032062	-	association	qPCR	PCR	Low-throughput	Significant dysregulation of seven candidate microRNAs has been found to be associated with risks involved in the manifestation of metabolic syndrome.	Circulating miRNA profiles in patients with metabolic syndrome	2012	-
microRNA	Homo sapiens	hsa-miR-27a	MIMAT0000084	hypo-HDL cholesterolemia	DOID:1387	5C81.Z	macrophage	24608080	ABCA1/LPL/ACAT1	association	-	-	-	These findings indicate that miR-27a/b affects the efflux, influx, esterification and hydrolysis of cellular cholesterol by regulating the expression of ABCA1, apoA1, LPL, CD36 and ACAT1.	MicroRNA-27a/b regulates cellular cholesterol efflux, influx and esterification/hydrolysis in THP-1 macrophages	2014	-
microRNA	Homo sapiens	hsa-miR-27a	MIMAT0000084	obesity	DOID:9970	5B81	adipocyte	24133204	PHB	downregulation	real-time PCR/luciferase reporter assays	PCR;luciferase assay	Low-throughput	Our data suggest that miR-27 is an anti-adipogenic microRNA partly by targeting PHB and impairing mitochondrial function. Pharmacological modulation of miR-27 function may provide a new therapeutic strategy for the treatment of obesity.	MicroRNA-27 (miR-27) targets prohibitin and impairs adipocyte differentiation and itochondrial function in human adipose-derived stem cells	2013	-
microRNA	Homo sapiens	hsa-miR-27a	MIMAT0000084	obesity	DOID:9970	5B81	peripheral blood	27919232	-	association	real-time qPCR	PCR	Low-throughput	The results of this study suggests that miR-27a rs895819 may not be associated with PE susceptibility; however, the miR-27a TC/CC genotype increases susceptibility to elevated BMI in PE, which may be significantly influenced by co-morbid HIV infection among pregnant women on HAART.	microRNA-27a rs895819 is associated with obesity in HIV infected preeclamptic Black South African women on HAART	2016	-
microRNA	Homo sapiens	hsa-miR-27a	MIMAT0000084	obesity	DOID:9970	5B81	adipose tissue	26536844	Lox	downregulation	qRT-PCR/luciferase reporter assay/Western blotting	PCR;luciferase assay;Immunoblotting	Low-throughput	Taken together, these results suggest a novel role for miR-27 in repressing adipogenic lineage commitment by targeting Lox.	miR-27 impairs the adipogenic lineage commitment via targeting lysyl oxidase	2015	-
microRNA	Homo sapiens	hsa-miR-27a-3p	MIMAT0000084	obesity	DOID:9970	5B81	serum	28638270	-	downregulation	qRT-PCR	PCR	Low-throughput	Our results support the clinical application of biomarkers in diagnosing early stage MetS, which will enable attenuation of disease progression before onset of irreversible complications.	Existence of a Strong Correlation of Biomarkers and miRNA in Females with Metabolic Syndrome and Obesity in a Population of West Virginia	2017	-
microRNA	Homo sapiens	hsa-miR-27a-3p	MIMAT0000084	type 2 diabetes mellitus	DOID:9352	5A11	serum	28638270	-	downregulation	qRT-PCR	PCR	Low-throughput	Our results support the clinical application of biomarkers in diagnosing early stage MetS, which will enable attenuation of disease progression before onset of irreversible complications.	Existence of a Strong Correlation of Biomarkers and miRNA in Females with Metabolic Syndrome and Obesity in a Population of West Virginia	2017	-
microRNA	Homo sapiens	hsa-miR-27b	MIMAT0000419	obesity	DOID:9970	5B81	whole blood	24037889	-	downregulation	RT-PCR	PCR	Low-throughput	Obesity significantly reduced the expression of miRNA-21, miRNA-27b, and miRNA-103.	Effects of polycystic ovary syndrome (PCOS), sex hormones, and obesity on circulating miRNA-21, miRNA-27b, miRNA-103, and miRNA-155 expression	2013	-
microRNA	Homo sapiens	hsa-miR-27b	MIMAT0000419	obesity	DOID:9970	5B81	brown adipose tissue	25187367	Prdm16	upregulation	qRT-PCR/luciferase reporter assay/Western blotting	PCR;luciferase assay;Immunoblotting	Low-throughput	Collectively, these results indicate that miR-27b functions as a central target of GC and as an upstream regulator of Prdm16 to control browning of WAT and, consequently, may represent a potential target in preventing obesity.	Glucocorticoids transcriptionally regulate miR-27b expression promoting body fat accumulation via suppressing the browning of white adipose tissue	2015	-
microRNA	Homo sapiens	hsa-miR-27b	MIMAT0000419	hypertension	DOID:10763	BA00	peripheral blood	28214904	DROSHA	association	real-time PCR/luciferase reporter assay/Western blotting	PCR;Luciferase assay;Immunoblotting	Low-throughput	The presence of rs10719 disrupted the interaction between miR-27b and DROSHA, which might be the underlying mechanism of the observation that rs10719 is significantly associated with risk of primary hypertension.	rs10719 Polymorphism Located within DROSHA 3'-Untranslated Region is Responsible for Development of Primary Hypertension by Disrupting Binding with microRNA-27b	2017	-
microRNA	Homo sapiens	hsa-miR-27b	MIMAT0000419	hypo-HDL cholesterolemia	DOID:1387	5C81.Z	macrophage	24608080	ABCA1/LPL/ACAT1	association	-	-	-	These findings indicate that miR-27a/b affects the efflux, influx, esterification and hydrolysis of cellular cholesterol by regulating the expression of ABCA1, apoA1, LPL, CD36 and ACAT1.	MicroRNA-27a/b regulates cellular cholesterol efflux, influx and esterification/hydrolysis in THP-1 macrophages	2014	-
microRNA	Homo sapiens	hsa-miR-27b	MIMAT0000419	obesity	DOID:9970	5B81	adipocyte	24133204	PHB	downregulation	real-time PCR/luciferase reporter assays	PCR;luciferase assay	Low-throughput	Our data suggest that miR-27 is an anti-adipogenic microRNA partly by targeting PHB and impairing mitochondrial function. Pharmacological modulation of miR-27 function may provide a new therapeutic strategy for the treatment of obesity.	MicroRNA-27 (miR-27) targets prohibitin and impairs adipocyte differentiation and itochondrial function in human adipose-derived stem cells	2013	-
microRNA	Homo sapiens	hsa-miR-27b	MIMAT0000419	obesity	DOID:9970	5B81	adipose tissue	19800867	PPARγ	downregulation	-	-	-	These results suggest that the anti-adipogenic effect of miR-27b in hMADS cells is due, at least in part, to suppression of PPARgamma.	microRNA miR-27b impairs human adipocyte differentiation and targets PPARgamma	2009	-
microRNA	Homo sapiens	hsa-miR-27b	MIMAT0000419	obesity	DOID:9970	5B81	adipose tissue	26536844	Lox	downregulation	qRT-PCR/luciferase reporter assay/Western blotting	PCR;luciferase assay;Immunoblotting	Low-throughput	Taken together, these results suggest a novel role for miR-27 in repressing adipogenic lineage commitment by targeting Lox.	miR-27 impairs the adipogenic lineage commitment via targeting lysyl oxidase	2015	-
microRNA	Homo sapiens	hsa-miR-27b-3p	MIMAT0000419	obesity	DOID:9970	5B81	visceral adipose tissue	29280351	-	association	qRT-PCR/Western blotting	PCR;Immunoblotting	Low-throughput	These findings highlight the decreased browning ability of VAT from humans with obesity and the role of miR-27b-3p in regulating browning of human visceral adipocytes. They suggest that miR-27b-3p should be further explored as a potential target for the treatment of central obesity.	MiR-27b-3p Regulation in Browning of Human Visceral Adipose Related to Central Obesity	2018	-
microRNA	Homo sapiens	hsa-miR-28-3p	MIMAT0004502	obesity	DOID:9970	5B81	plasma	23928666	-	downregulation	RT-PCR	PCR	Low-throughput	This study provides the first evidence that circulating miRNAs are deregulated in prepubertal obese children. Thus, the very early detection of an abnormal circulating miRNA profile may be a promising strategy to identify obese children who may suffer from metabolic abnormalities.	Changes in circulating microRNAs are associated with childhood obesity	2013	-
microRNA	Homo sapiens	hsa-miR-296	MIMAT0000690	obesity	DOID:9970	5B81	adipose tissue	30597763	-	differential expression	qPCR	PCR	Low-throughput	This study provides experimental evidence of the possible correlation between AT miR-20b-miR-296-Let-7f with obesity and T2D, which might involve vascular endothelial growth factor and WNT-dependent pathways that are regulated by six different genes, suggesting a novel signaling pathway that could be important for understanding the mechanisms underlying the AT dysfunction associated with obesity …	miR-20b, miR-296, and Let-7f Expression in Human Adipose Tissue is Related to Obesity and Type 2 Diabetes	2019	-
microRNA	Homo sapiens	hsa-miR-296	MIMAT0000690	type 2 diabetes mellitus	DOID:9352	5A11	adipose tissue	30597763	-	upregulation	qPCR	PCR	Low-throughput	This study provides experimental evidence of the possible correlation between AT miR-20b-miR-296-Let-7f with obesity and T2D, which might involve vascular endothelial growth factor and WNT-dependent pathways that are regulated by six different genes, suggesting a novel signaling pathway that could be important for understanding the mechanisms underlying the AT dysfunction associated with obesity …	miR-20b, miR-296, and Let-7f Expression in Human Adipose Tissue is Related to Obesity and Type 2 Diabetes	2019	-
microRNA	Homo sapiens	hsa-miR-296-5p	MIMAT0000690	hypertension	DOID:10763	BA00	plasma	21690488	-	differential expression	microarray/qRT-PCR/Western blotting	microarray;PCR;Immunoblotting	Low-throughput	We report for the first time a circulating miRNA profile for hypertensive patients and demonstrate a novel link between HCMV infection and essential hypertension. These findings may reveal important insights into the pathogenesis of essential hypertension.	Signature microRNA expression profile of essential hypertension and its novel link to human cytomegalovirus infection	2011	-
microRNA	Homo sapiens	hsa-miR-296-5p	MIMAT0000690	hypertension	DOID:10763	BA00	plasma	25837765	-	downregulation	qRT-PCR	PCR	Low-throughput	We report for the first time a plasma miRNA profile for WCH patients and demonstrate a novel link between miRNA and WCH. These findings may reveal crucial insights into the development of WCH.	Differential expression of hypertension-associated microRNAs in the plasma of patients with white coat hypertension	2015	-
microRNA	Homo sapiens	hsa-miR-299-5p	MIMAT0002890	type 2 diabetes mellitus	DOID:9352	5A11	islet	30131392	PERP	downregulation	microarray/luciferase reporter assays	microarray;luciferase assays	Low-throughput	Our work demonstrates a novel mechanism of glucolipotoxicity-induced β-cell failure mediated through miR-299-5p downregulation.	Glucolipotoxicity-Inhibited miR-299-5p Regulates Pancreatic β-Cell Function and Survival	2018	-
microRNA	Homo sapiens	hsa-miR-29a	MIMAT0000086	type 2 diabetes mellitus	DOID:9352	5A11	plasma	29643835	-	upregulation	qRT-PCR	PCR	Low-throughput	let-7b, miR-142, miR-144, and miR-29a in plasma may be important markers of neuroendocrine stress response and may play a role in the pathogenesis of T2DM and IR.	Identification of Neuroendocrine Stress Response-Related Circulating MicroRNAs as Biomarkers for Type 2 Diabetes Mellitus and Insulin Resistance	2018	-
microRNA	Homo sapiens	hsa-miR-29a	MIMAT0000086	hypertension	DOID:10763	BA00	blood	28287884	-	upregulation	qRT-PCR	PCR	Low-throughput	Circulating the miR-29 family may possibly represent potential non-invasive markers of hypertension and TOD in essential hypertensive patients.	Circulating miRNA29 family expression levels in patients with essential hypertension as potential markers for left ventricular hypertrophy	2017	-
microRNA	Homo sapiens	hsa-miR-29a	MIMAT0000086	type 2 diabetes mellitus	DOID:9352	5A11	skeletal muscle	28404597	-	upregulation	real-time qPCR	PCR	Low-throughput	Collectively, we reveal that miR-29 acts as an important regulator of insulin-stimulated glucose metabolism and lipid oxidation, with relevance to human physiology and type 2 diabetes.	Altered miR-29 Expression in Type 2 Diabetes Influences Glucose and Lipid Metabolism in Skeletal Muscle	2017	-
microRNA	Homo sapiens	hsa-miR-29a-3p	MIMAT0000086	metabolic syndrome	DOID:14221	5A44	urine	30972221	IGF1	upregulation	RT-qPCR/luciferase reporter assay/Western blotting	PCR;luciferase assay;Immunoblotting	Low-throughput	Elevated urinary miR-29a-3p levels were positively associated with MetS and demonstrated to have a potential value as biomarkers in the diagnosis of MetS. The findings provided a better understanding of the role of urinary miRNAs in pathogenesis of MetS.	Urinary miRNA-29a-3p levels are associated with metabolic parameters via regulation of IGF1 in patients with metabolic syndrome	2019	-
microRNA	Homo sapiens	hsa-miR-29a-3p	MIMAT0000086	obesity	DOID:9970	5B81	subcutaneous adipose tissue	28158925	-	association	microarray/RT-qPCR	microarray;PCR	Low-throughput	Weight loss influenced several miRNAs, some of which were negatively correlated with predicted targets. These dysregulated miRNAs may affect adipocytokine signaling and forkhead box protein O signaling.	miRNAs in human subcutaneous adipose tissue: Effects of weight loss induced by hypocaloric diet and exercise	2017	GSE87103
microRNA	Homo sapiens	hsa-miR-29a-5p	MIMAT0004503	obesity	DOID:9970	5B81	subcutaneous adipose tissue	28158925	-	association	microarray/RT-qPCR	microarray;PCR	Low-throughput	Weight loss influenced several miRNAs, some of which were negatively correlated with predicted targets. These dysregulated miRNAs may affect adipocytokine signaling and forkhead box protein O signaling.	miRNAs in human subcutaneous adipose tissue: Effects of weight loss induced by hypocaloric diet and exercise	2017	GSE87103
microRNA	Homo sapiens	hsa-miR-29b	MIMAT0000100	obesity	DOID:9970	5B81	adipose tissue	27030318	SP1/TNF-α	association	real-time PCR/luciferase reporter assays	PCR;luciferase assay;ChIP assay	Low-throughput	This study investigated the regulatory role of miR-29b during the adipogenic differentiation of ADSCs and found that miR-29b is an effective positive regulator of adipogenesis.	MicroRNA-29b promotes the adipogenic differentiation of human adipose tissue-derived stromal cells	2016	-
microRNA	Homo sapiens	hsa-miR-29b	MIMAT0000100	type 2 diabetes mellitus	DOID:9352	5A11	plasma	24497980	-	differential expression	real-time qPCR	PCR	Low-throughput	This study suggests that the association between plasma miR-144 expression and T2D differs between Swedes and Iraqis.	Determination of 14 circulating microRNAs in Swedes and Iraqis with and without diabetes mellitus type 2	2014	-
microRNA	Homo sapiens	hsa-miR-29b	MIMAT0000100	hypertension	DOID:10763	BA00	blood	28287884	-	upregulation	qRT-PCR	PCR	Low-throughput	Circulating the miR-29 family may possibly represent potential non-invasive markers of hypertension and TOD in essential hypertensive patients.	Circulating miRNA29 family expression levels in patients with essential hypertension as potential markers for left ventricular hypertrophy	2017	-
microRNA	Homo sapiens	hsa-miR-29b	MIMAT0000100	obesity	DOID:9970	5B81	subcutaneous adipose tissue	27164408	SP1	association	qRT-PCR/luciferase reporter assay/Western blotting	PCR;luciferase assay;Immunoblotting;ChIP assay	Low-throughput	Our results suggest that ETS1 promotes TNF-α gene transcription in adipocytes. In addition, we demonstrated that 4-HNE promotes TNF-α gene transcription through the inhibition of the miR-29b → SP1 → TNF-α pathway and promotion of the ETS1 → TNF-α pathway.	4-Hydroxynonenal Regulates TNF-α Gene Transcription Indirectly via ETS1 and microRNA-29b in Human Adipocytes Induced From Adipose Tissue-Derived Stromal Cells	2016	-
microRNA	Homo sapiens	hsa-miR-29c	MIMAT0000681	hypertension	DOID:10763	BA00	blood	28287884	-	upregulation	qRT-PCR	PCR	Low-throughput	Circulating the miR-29 family may possibly represent potential non-invasive markers of hypertension and TOD in essential hypertensive patients.	Circulating miRNA29 family expression levels in patients with essential hypertension as potential markers for left ventricular hypertrophy	2017	-
microRNA	Homo sapiens	hsa-miR-29c	MIMAT0000681	type 2 diabetes mellitus	DOID:9352	5A11	skeletal muscle	28404597	-	upregulation	real-time qPCR	PCR	Low-throughput	Collectively, we reveal that miR-29 acts as an important regulator of insulin-stimulated glucose metabolism and lipid oxidation, with relevance to human physiology and type 2 diabetes.	Altered miR-29 Expression in Type 2 Diabetes Influences Glucose and Lipid Metabolism in Skeletal Muscle	2017	-
microRNA	Homo sapiens	hsa-miR-300	MIMAT0004903	hyperlipidemia	DOID:1168	5C80.1	peripheral blood	29674246	-	downregulation	microarray/RT-qPCR	microarray;PCR	Low-throughput	This is the first study of miRNA expression analysis of human PBMCs during postprandial hypertriglyceridemia and offers insight into new potential mechanisms by which dietary SFAs influence health or disease.	A microRNA expression signature of the postprandial state in response to a high-saturated-fat challenge	2018	-
microRNA	Homo sapiens	hsa-miR-30a	MIMAT0000087	obesity	DOID:9970	5B81	subcutaneous adipose tissue	30002134	STAT1	association	qRT-PCR/Western Blotting/Chromatin Immunoprecipitation	PCR;Immunoblotting	Low-throughput	Together, our data identify a critical molecular signaling axis, elements of which are involved in uncoupling obesity from metabolic dysfunction.	miR-30a Remodels Subcutaneous Adipose Tissue Inflammation to Improve Insulin Sensitivity in Obesity	2018	-
microRNA	Homo sapiens	hsa-miR-30a	MIMAT0000087	obesity	DOID:9970	5B81	subcutaneous adipose tissue	27758866	Ubc9	upregulation	qPCR/luciferase reporter assay	PCR;luciferase assay;Immunoblotting	Low-throughput	Taken together, our data demonstrate a previously unappreciated molecular axis that controls browning of human white adipocytes.	Mitochondrial Activity in Human White Adipocytes Is Regulated by the Ubiquitin Carrier Protein 9/microRNA-30a Axis	2016	-
microRNA	Homo sapiens	hsa-miR-30a	MIMAT0000087	obesity	DOID:9970	5B81	plasma	30383229	-	differential expression	microarray/RT-qPCR	microarray;PCR	Low-throughput	Our study has provided evidence that the circulating miRNAs associated with various disorders are dysregulated in women who are obese. We also found that seven of these miRNAs showed levels comparable to those in lean controls after acute weight loss in women who are obese.	Acute Weight Loss Restores Dysregulated Circulating MicroRNAs in Individuals Who Are Obese	2019	-
microRNA	Homo sapiens	hsa-miR-30a	MIMAT0000087	obesity	DOID:9970	5B81	adipose tissue	21767385	RUNX2	upregulation	RNA-seq/Real-time PCR/Western blotting	sequencing;PCR;Immunoblotting	High-throughput	Overall, our data suggest that the miR-30 family plays a central role in adipocyte development. Moreover, as adipose tissue-derived stem cells can differentiate into either adipocytes or osteoblasts, the down-regulation of the osteogenesis regulator RUNX2 represents a plausible mechanism by which miR-30 miRNAs may contribute to adipogenic differentiation of adipose tissue-derived stem cells.	Small RNA sequencing reveals miR-642a-3p as a novel adipocyte-specific microRNA and miR-30 as a key regulator of human adipogenesis	2011	GSE25715
microRNA	Homo sapiens	hsa-miR-30b-5p	MIMAT0000420	type 2 diabetes mellitus	DOID:9352	5A11	plasma	30461200	-	differential expression	microarray/RT-qPCR	array;PCR	Low-throughput	Our findings suggest that genetic polymorphisms of TGFBRAP1 may contribute to the genetic susceptibility of T2DM by mediating diabetes-related miRNA expression.	The variant at TGFBRAP1 is significantly associated with type 2 diabetes mellitus and affects diabetes-related miRNA expression	2019	-
microRNA	Homo sapiens	hsa-miR-30c	MIMAT0000244	obesity	DOID:9970	5B81	adipocyte	21878751	PAI-1/ALK2	upregulation	qRT-PCR/luciferase reporter assays	PCR;luciferase assay	Low-throughput	Thus, miR-30c can target two, so far not interconnected genes in distinct pathways, supporting the idea that miRNAs might coordinate larger regulatory networks than previously anticipated.	MicroRNA-30c promotes human adipocyte differentiation and co-represses PAI-1 and ALK2	2011	-
microRNA	Homo sapiens	hsa-miR-30c	MIMAT0000244	type 2 diabetes mellitus	DOID:9352	5A11	platelet	27819307	PAI-1	upregulation	qRT-PCR/luciferase reporter assays	PCR;luciferase assays	Low-throughput	These results provide important implications regarding the regulation of fibrinolysis by platelet miRNA under diabetic mellitus.	Hyperglycaemia-induced reciprocal changes in miR-30c and PAI-1 expression in platelets	2016	-
microRNA	Homo sapiens	hsa-miR-30d	MIMAT0000245	obesity	DOID:9970	5B81	adipose tissue	29721017	SFRP4	upregulation	qRT-PCR	PCR	Low-throughput	This study suggests a novel association between the elevated levels of miRNAs miR-24, miR-30d, and miR-146a (apparently coregulated) and the level of SFRP4 transcript in AbdAT of subjects with obesity and T2DM.	Elevated and Correlated Expressions of miR-24, miR-30d, miR-146a, and SFRP-4 in Human Abdominal Adipose Tissue Play a Role in Adiposity and Insulin Resistance	2018	-
microRNA	Homo sapiens	hsa-miR-30d	MIMAT0000245	type 2 diabetes mellitus	DOID:9352	5A11	adipose tissue	29721017	SFRP4	upregulation	qPCR	PCR	Low-throughput	This study suggests a novel association between the elevated levels of miRNAs miR-24, miR-30d, and miR-146a (apparently coregulated) and the level of SFRP4 transcript in AbdAT of subjects with obesity and T2DM.	Elevated and Correlated Expressions of miR-24, miR-30d, miR-146a, and SFRP-4 in Human Abdominal Adipose Tissue Play a Role in Adiposity and Insulin Resistance	2018	-
microRNA	Homo sapiens	hsa-miR-30d	MIMAT0000245	type 2 diabetes mellitus	DOID:9352	5A11	plasma	30766816	-	upregulation	qRT-PCR	PCR	Low-throughput	The current study demonstrated that miR30d (insulin gene transcription in pancreatic beta cell and regulator of insulin sensitivity in skeletal muscle) was overexpressed among T2D.	The Role of Circulating MicroRNA in the Regulation of Beta Cell Function and Insulin Resistance among Indians with Type 2 Diabetes	2018	-
microRNA	Homo sapiens	hsa-miR-30d	MIMAT0000245	obesity	DOID:9970	5B81	adipose tissue	21767385	RUNX2	upregulation	RNA-seq/Real-time PCR/Western blotting	sequencing;PCR;Immunoblotting	High-throughput	Overall, our data suggest that the miR-30 family plays a central role in adipocyte development. Moreover, as adipose tissue-derived stem cells can differentiate into either adipocytes or osteoblasts, the down-regulation of the osteogenesis regulator RUNX2 represents a plausible mechanism by which miR-30 miRNAs may contribute to adipogenic differentiation of adipose tissue-derived stem cells.	Small RNA sequencing reveals miR-642a-3p as a novel adipocyte-specific microRNA and miR-30 as a key regulator of human adipogenesis	2011	GSE25715
microRNA	Homo sapiens	hsa-miR-31	MIMAT0000089	obesity	DOID:9970	5B81	white adipose tissue	29605715		upregulation	qPCR	PCR	Low-throughput	miR-31 located in the obesity QTL Nob6 was experimentally analyzed. Its expression was higher in gWAT of obese and diabetic mice and humans than of lean controls.	A computational biology approach of a genome-wide screen connected miRNAs to obesity and type 2 diabetes	2018	GSE111142
microRNA	Homo sapiens	hsa-miR-31	MIMAT0000089	hypertension	DOID:10763	BA00	liver	23943853	AGT	association	real-time PCR/luciferase reporter assay/Western blotting	PCR;Luciferase assay;Immunoblotting	Low-throughput	We show here that miR-31 and miR-584 bind strongly to the hAGT 3'-UTR containing 11525C allele compared with 11525A allele. We also show that transfection of miR-31 and miR-584 downregulates the hAGT mRNA and protein levels in human liver cells. These studies may provide new therapeutic approach to reduce hypertension.	Human angiotensinogen +11525 C/A polymorphism modulates its gene expression through microRNA binding	2013	-
microRNA	Homo sapiens	hsa-miR-31	MIMAT0000089	obesity	DOID:9970	5B81	plasma	28342299	-	association	qRT-PCR	PCR	Low-throughput	The findings provide evidence that circulating miRNAs play important roles in obesity and weight gain and suggest new targets for understanding the mechanisms of weight gain and developing weight loss intervention strategies.	Plasma MicroRNA signature predicting weight gain among Mexican-American women	2017	-
microRNA	Homo sapiens	hsa-miR-31-5p	MIMAT0000089	obesity	DOID:9970	5B81	plasma	27551310	-	upregulation	RT-qPCR	PCR	Low-throughput	The validation by RT-qPCR in the individual plasma samples showed a twofold upregulation of miR-31-5p, a threefold upregulation of miR-2355-5p, and a 0.5-fold downregulation of miR-206 in OW/Ob as compared with NW.	Circulating microRNAs are deregulated in overweight/obese children: preliminary results of the I.Family study	2016	-
microRNA	Homo sapiens	hsa-miR-320	MIMAT0000510	obesity	DOID:9970	5B81	blood	28920467	-	downregulation	real-time qPCR	PCR	Low-throughput	Our findings support the need for further studies to determine whether such changes are consistent across different populations and whether the identified microRNAs may represent novel biomarkers to predict the susceptibility and progression of obesity-related disorders.	Association of subcutaneous and visceral fat with circulating microRNAs in a middle-aged Japanese population	2018	-
microRNA	Homo sapiens	hsa-miR-320	MIMAT0000510	obesity	DOID:9970	5B81	plasma	30383229	-	differential expression	microarray/RT-qPCR	microarray;PCR	Low-throughput	Our study has provided evidence that the circulating miRNAs associated with various disorders are dysregulated in women who are obese. We also found that seven of these miRNAs showed levels comparable to those in lean controls after acute weight loss in women who are obese.	Acute Weight Loss Restores Dysregulated Circulating MicroRNAs in Individuals Who Are Obese	2019	-
microRNA	Homo sapiens	hsa-miR-320a	MIMAT0037311	type 2 diabetes mellitus	DOID:9352	5A11	blood	23032062	-	association	qPCR	PCR	Low-throughput	Significant dysregulation of seven candidate microRNAs has been found to be associated with risks involved in the manifestation of metabolic syndrome.	Circulating miRNA profiles in patients with metabolic syndrome	2012	-
microRNA	Homo sapiens	hsa-miR-320a	MIMAT0037311	type 2 diabetes mellitus	DOID:9352	5A11	plasma	30461200	-	differential expression	microarray/RT-qPCR	array;PCR	Low-throughput	Our findings suggest that genetic polymorphisms of TGFBRAP1 may contribute to the genetic susceptibility of T2DM by mediating diabetes-related miRNA expression.	The variant at TGFBRAP1 is significantly associated with type 2 diabetes mellitus and affects diabetes-related miRNA expression	2019	-
microRNA	Homo sapiens	hsa-miR-320a	MIMAT0037311	obesity	DOID:9970	5B81	serum	28638270	-	downregulation	qRT-PCR	PCR	Low-throughput	Our results support the clinical application of biomarkers in diagnosing early stage MetS, which will enable attenuation of disease progression before onset of irreversible complications.	Existence of a Strong Correlation of Biomarkers and miRNA in Females with Metabolic Syndrome and Obesity in a Population of West Virginia	2017	-
microRNA	Homo sapiens	hsa-miR-320a	MIMAT0037311	type 2 diabetes mellitus	DOID:9352	5A11	serum	28638270	-	downregulation	qRT-PCR	PCR	Low-throughput	Our results support the clinical application of biomarkers in diagnosing early stage MetS, which will enable attenuation of disease progression before onset of irreversible complications.	Existence of a Strong Correlation of Biomarkers and miRNA in Females with Metabolic Syndrome and Obesity in a Population of West Virginia	2017	-
microRNA	Homo sapiens	hsa-miR-320b	MIMAT0005792	type 2 diabetes mellitus	DOID:9352	5A11	plasma	27039347	-	differential expression	qRT-PCR	PCR	Low-throughput	Taken together, our results showed differentially expressed miRNAs in T2D and prediabetes. Plasma hsa-miR-1249, hsa-miR-320b, and hsa-miR-572 may serve as novel biomarkers for diagnosis and potential targets for the treatment for prediabetes and T2D.	Differential expression of microRNAs in plasma of patients with prediabetes and newly diagnosed type 2 diabetes	2016	-
microRNA	Homo sapiens	hsa-miR-320d	MIMAT0006764	type 2 diabetes mellitus	DOID:9352	5A11	serum	26554942	-	differential expression	microarray/RT-qPCR	array;PCR	Low-throughput	This study provided evidence that serum miRNAs had differential expressions between healthy controls and T2DM patients. These five differential expression miRNAs might be of help for subsequent study in T2DM.	Identification of the differential expression of serum microRNA in type 2 diabetes	2016	-
microRNA	Homo sapiens	hsa-miR-326	MIMAT0000756	type 2 diabetes mellitus	DOID:9352	5A11	plasma	24937531	-	upregulation	qRT-PCR	PCR	Low-throughput	Quantitative RT-PCR validation confirmed the significant up-regulation of miR-326 (P = .004) and down-regulation of let-7a (P < .001) and let-7f (P = .003).	Plasma exosome microRNA profiling unravels a new potential modulator of adiponectin pathway in diabetes: effect of glycemic control	2014	-
microRNA	Homo sapiens	hsa-miR-328-3p	MIMAT0000752	type 2 diabetes mellitus	DOID:9352	5A11	plasma	30461200	-	differential expression	microarray/RT-qPCR	array;PCR	Low-throughput	Our findings suggest that genetic polymorphisms of TGFBRAP1 may contribute to the genetic susceptibility of T2DM by mediating diabetes-related miRNA expression.	The variant at TGFBRAP1 is significantly associated with type 2 diabetes mellitus and affects diabetes-related miRNA expression	2019	-
microRNA	Homo sapiens	hsa-miR-33	MIMAT0000091	hypo-HDL cholesterolemia	DOID:1387	5C81.Z	blood	26223376	-	association	real-time qPCR	PCR	Low-throughput	Low levels of miR-335, miR-143 and miR-758, and high levels of miR-27, miR-378, miR-33 and miR-370 may have been responsible for elevated triglycerides and low-density lipoprotein (LDL-C) levels, and low level of high-density lipoprotein (HDL-C) in obese subjects. Therefore, miRNAs may be a good novel biomarker for childhood obesity.	The investigation of circulating microRNAs associated with lipid metabolism in childhood obesity	2016	-
microRNA	Homo sapiens	hsa-miR-335	MIMAT0000765	obesity	DOID:9970	5B81	blood	26223376	-	downregulation	real-time qPCR	PCR	Low-throughput	Our findings showed that a significant association is present between circulating miR-370, miR-33, miR-378, miR-27, miR-335, miR-143 and miR-758 values, and childhood obesity. Low levels of miR-335, miR-143 and miR-758, and high levels of miR-27, miR-378, miR-33 and miR-370 may have been responsible for elevated triglycerides and low-density lipoprotein (LDL-C) levels, and low level of high-densi…	The investigation of circulating microRNAs associated with lipid metabolism in childhood obesity	2016	-
microRNA	Homo sapiens	hsa-miR-335	MIMAT0000765	obesity	DOID:9970	5B81	adipocyte	23801157	-	upregulation	qRT-PCR/luciferase reporter assays	PCR;luciferase assays	Low-throughput	These findings indicated a novel role for miR-335 in adipose tissue inflammation, and miR-335 might play an important role in the process of obesity complications via its own transcription mechanism.	MiR-335, an adipogenesis-related microRNA, is involved in adipose tissue inflammation	2014	-
microRNA	Homo sapiens	hsa-miR-335	MIMAT0000765	type 2 diabetes mellitus	DOID:9352	5A11	islet	29122960	STXBP1/SNAP25/ SYT11	association	RT-qPCR	PCR	Low-throughput	Here, we show a specific role of miR-335 in regulating insulin secretion during this transition period. Moreover, we can conclude that miR-335 has the capacity to modulate insulin secretion and Ca2+-dependent exocytosis through effects on granular priming.	MiR-335 overexpression impairs insulin secretion through defective priming of insulin vesicles	2017	-
microRNA	Homo sapiens	hsa-miR-335	MIMAT0000765	hypo-HDL cholesterolemia	DOID:1387	5C81.Z	blood	26223376	-	association	real-time qPCR	PCR	Low-throughput	Low levels of miR-335, miR-143 and miR-758, and high levels of miR-27, miR-378, miR-33 and miR-370 may have been responsible for elevated triglycerides and low-density lipoprotein (LDL-C) levels, and low level of high-density lipoprotein (HDL-C) in obese subjects. Therefore, miRNAs may be a good novel biomarker for childhood obesity.	The investigation of circulating microRNAs associated with lipid metabolism in childhood obesity	2016	-
microRNA	Homo sapiens	hsa-miR-335-5p	MIMAT0000765	type 2 diabetes mellitus	DOID:9352	5A11	plasma	30461200	-	differential expression	microarray/RT-qPCR	array;PCR	Low-throughput	Our findings suggest that genetic polymorphisms of TGFBRAP1 may contribute to the genetic susceptibility of T2DM by mediating diabetes-related miRNA expression.	The variant at TGFBRAP1 is significantly associated with type 2 diabetes mellitus and affects diabetes-related miRNA expression	2019	-
microRNA	Homo sapiens	hsa-miR-33a	MIMAT0000091	obesity	DOID:9970	5B81	serum	30537863	-	association	qRT-PCR	PCR	Low-throughput	Ageing influenced the relationship of circulating miR-33a and miR-33b with insulin resistance and increased adiposity.	Ageing influences the relationship of circulating miR-33a and miR- 33b levels with insulin resistance and adiposity	2018	-
microRNA	Homo sapiens	hsa-miR-33a	MIMAT0000091	hypo-HDL cholesterolemia	DOID:1387	5C81.Z	liver	20466885	ABCA1	association	qRT-PCR/luciferase reporter assay/Western blotting	PCR;Luciferase assay;Immunoblotting	Low-throughput	miR-33 appears to regulate both HDL biogenesis in the liver and cellular cholesterol efflux.	MiR-33 contributes to the regulation of cholesterol homeostasis	2010	-
microRNA	Homo sapiens	hsa-miR-33a	MIMAT0000091	hypo-HDL cholesterolemia	DOID:1387	5C81.Z	peripheral blood	26051418	-	association	qPCR	PCR	Low-throughput	The hyper group presented a decrease of 72% in hsa-miR-33a and higher mRNA expression of ABCA1 and ABCG1 when compared with CTL.	Asymptomatic individuals with high HDL-C levels overexpress ABCA1 and ABCG1 and present miR-33a dysregulation in peripheral blood mononuclear cells	2015	-
microRNA	Homo sapiens	hsa-miR-33a	MIMAT0000091	obesity	DOID:9970	5B81	liver	26945479	ABCA1	association	RT-PCR	PCR	Low-throughput	miR-33a/144 and their target gene ABCA1 may contribute to the pathogenesis of NASH in morbidly obese subjects.	Hepatic miR-33a/miR-144 and their target gene ABCA1 are associated with steatohepatitis in morbidly obese subjects	2016	-
microRNA	Homo sapiens	hsa-miR-33a	MIMAT0000091	hyperlipidemia	DOID:1168	5C80.1	serum	24928089	-	upregulation	microarray	microarray	Low-throughput	These data show a statistically significant correlation of the analyzed miRNA with increased lipids, specifically with α- and β-lipoproteins, and CRP and IL-1β levels in HL and/or HG sera, suggesting a contribution of these miRNAs to the atherosclerotic process.	Analysis of circulating microRNAs that are specifically increased in hyperlipidemic and/or hyperglycemic sera	2014	-
microRNA	Homo sapiens	hsa-miR-33a	MIMAT0000091	hypo-HDL cholesterolemia	DOID:1387	5C81.Z	hepatocyte	20466882	ABCA1	association	qRT-PCR/luciferase reporter assays	PCR;Luciferase assay	Low-throughput	Our findings indicate that miR-33 acts in concert with the SREBP host genes to control cholesterol homeostasis and suggest that miR-33 may represent a therapeutic target for ameliorating cardiometabolic diseases.	MicroRNA-33 and the SREBP host genes cooperate to control cholesterol homeostasis	2010	-
microRNA	Homo sapiens	hsa-miR-33b	MIMAT0003301	hypo-HDL cholesterolemia	DOID:1387	5C81.Z	macrophage	24931346	SREBF1	association	qRT-PCR/Southern blotting/Western blotting	PCR;Immunoblotting;knock-in	Low-throughput	These results indicate that miR-33b may account for lower HDL-C levels in humans than those in mice and that miR-33b is possibly utilized for a feedback mechanism to regulate its host gene SREBF1. Our mice will also aid in elucidating the roles of miR-33a/b in different genetic disease models.	MicroRNA-33b knock-in mice for an intron of sterol regulatory element-binding factor 1 (Srebf1) exhibit reduced HDL-C in vivo	2014	-
microRNA	Homo sapiens	hsa-miR-33b	MIMAT0003301	hypo-HDL cholesterolemia	DOID:1387	5C81.Z	macrophage	30354203	ABCA1	association	knock-in	knock-in	Low-throughput	Our data demonstrated critical roles of SREBF1-miR-33b axis on both lipid profiles and macrophage phenotype remodeling and indicate that miR-33b is a promising target for treating atherosclerosis.	SREBF1/MicroRNA-33b Axis Exhibits Potent Effect on Unstable Atherosclerotic Plaque Formation In Vivo	2018	-
microRNA	Homo sapiens	hsa-miR-33b	MIMAT0003301	obesity	DOID:9970	5B81	adipocyte	26830228	SREBP-1	upregulation	qRT-PCR/luciferase reporter assay/Western blotting	PCR;luciferase assay;Immunoblotting	Low-throughput	These findings demonstrate a novel role of miR-33b in the regulation of adipocyte differentiation, with important implications for the development of obesity and metabolic disease.	SREBP-1c/MicroRNA 33b Genomic Loci Control Adipocyte Differentiation	2016	-
microRNA	Homo sapiens	hsa-miR-33b	MIMAT0003301	obesity	DOID:9970	5B81	serum	30537863	-	association	qRT-PCR	PCR	Low-throughput	Ageing influenced the relationship of circulating miR-33a and miR-33b with insulin resistance and increased adiposity.	Ageing influences the relationship of circulating miR-33a and miR- 33b levels with insulin resistance and adiposity	2018	-
microRNA	Homo sapiens	hsa-miR-33b	MIMAT0003301	hypo-HDL cholesterolemia	DOID:1387	5C81.Z	liver	24931346	SREBF1	association	qRT-PCR/Southern blotting/Western blotting	PCR;Immunoblotting	Low-throughput	These results indicate that miR-33b may account for lower HDL-C levels in humans than those in mice and that miR-33b is possibly utilized for a feedback mechanism to regulate its host gene SREBF1. Our mice will also aid in elucidating the roles of miR-33a/b in different genetic disease models.	MicroRNA-33b knock-in mice for an intron of sterol regulatory element-binding factor 1 (Srebf1) exhibit reduced HDL-C in vivo	2014	-
microRNA	Homo sapiens	hsa-miR-33b	MIMAT0003301	type 2 diabetes mellitus	DOID:9352	5A11	plasma	27301461	-	association	RT-PCR	PCR	Low-throughput	We postulated that plasma miRNA33b may be useful as a new metabolic biomarker of dyslipidemia in patients with T2DM as well as metabolic syndrome via an insulin/SREBP-1c/miRNA33b/ABCA1 pathway.	Clinical Significance of Determining Plasma MicroRNA33b in Type 2 Diabetic Patients with Dyslipidemia	2016	-
microRNA	Homo sapiens	hsa-miR-33b	MIMAT0003301	hyperlipidemia	DOID:1168	5C80.1	plasma	27301461	-	association	RT-PCR	PCR	Low-throughput	We postulated that plasma miRNA33b may be useful as a new metabolic biomarker of dyslipidemia in patients with T2DM as well as metabolic syndrome via an insulin/SREBP-1c/miRNA33b/ABCA1 pathway.	Clinical Significance of Determining Plasma MicroRNA33b in Type 2 Diabetic Patients with Dyslipidemia	2016	-
microRNA	Homo sapiens	hsa-miR-33b	MIMAT0003301	hypo-HDL cholesterolemia	DOID:1387	5C81.Z	hepatocyte	20466882	ABCA1	association	qRT-PCR/luciferase reporter assays	PCR;Luciferase assay	Low-throughput	Our findings indicate that miR-33 acts in concert with the SREBP host genes to control cholesterol homeostasis and suggest that miR-33 may represent a therapeutic target for ameliorating cardiometabolic diseases.	MicroRNA-33 and the SREBP host genes cooperate to control cholesterol homeostasis	2010	-
microRNA	Homo sapiens	hsa-miR-33b*	MIMAT0004811	obesity	DOID:9970	5B81	liver	27669236	-	upregulation	real-time qPCR	PCR	Low-throughput	Hepatic miR33b* expression was increased in MO compared to ModO and controls, whereas miR122 expression was decreased in the MO group compared to ModO.	miR33a/miR33b* and miR122 as Possible Contributors to Hepatic Lipid Metabolism in Obese Women with Nonalcoholic Fatty Liver Disease	2016	-
microRNA	Homo sapiens	hsa-miR-34a	MIMAT0000255	obesity	DOID:9970	5B81	plasma	29607782	-	upregulation	RT-PCR	PCR	Low-throughput	Overweight and obesity, independent of other cardiometabolic risk factors, negatively influences circulating inflammation-related miRs. Dysregulation of circulating miRs may contribute mechanistically to the heightened inflammatory state associated with overweight and obesity.	Influence of Overweight and Obesity on Circulating Inflammation-Related microRNA	2018	-
microRNA	Homo sapiens	hsa-miR-34a	MIMAT0000255	type 2 diabetes mellitus	DOID:9352	5A11	serum	20857148	-	upregulation	RT-PCR	PCR	Low-throughput	We conclude that the expression levels of seven diabetes-related miRNAs in serum were significantly elevated in n-T2D compared with pre-diabetes and/or s-NGT, and the latter two groups featured similar expression patterns of these miRNAs, suggesting that during the pathogenesis of T2D, the peripheral diabetes-related miRNAs have not changed significantly from s-NGT at pre-diabetic stage.	Significance of serum microRNAs in pre-diabetes and newly diagnosed type 2 diabetes: a clinical study	2011	-
microRNA	Homo sapiens	hsa-miR-34a	MIMAT0000255	type 2 diabetes mellitus	DOID:9352	5A11	peripheral blood	29285097	-	upregulation	RT-qPCR	PCR	Low-throughput	These results indicate that the alteration of miR-34a and miR-125b exists in patients with T2DM, which may be involved in the pathogenesis of T2DM, and could be a potential novel biomarker of T2DM.	miR-34a and miR-125b are upregulated in peripheral blood mononuclear cells from patients with type 2 diabetes mellitus	2017	-
microRNA	Homo sapiens	hsa-miR-34a	MIMAT0000255	type 2 diabetes mellitus	DOID:9352	5A11	heart	29302057	SIRT1	upregulation	RT-PCR	PCR	Low-throughput	Taken together, our results demonstrate upregulation of miR-34a in the diabetic heart and in the circulation from an early stage of the disease. However, inhibition of miR-34a activity has differential effects depending on the cell type, thereby warranting the need to eliminate off-target effects when introducing miR-based therapy.	Diabetes induces the activation of pro-ageing miR-34a in the heart, but has differential effects on cardiomyocytes and cardiac progenitor cells	2018	-
microRNA	Homo sapiens	hsa-miR-34a	MIMAT0000255	hypertension	DOID:10763	BA00	peripheral blood	29285082	TIGF2	upregulation	RT-qPCR/luciferase reporter assay/Western blotting	PCR;Luciferase assay;Immunoblotting	Low-throughput	These data suggested that miR-34a was upregulated in the peripheral blood of patients with hypertension, and that pregulated miR-34a may promote vascular endothelial injury by targeting TIGF2.	Molecular mechanisms in vascular injury induced by hypertension: Expression and role of microRNA-34a	2017	-
microRNA	Homo sapiens	hsa-miR-34a	MIMAT0000255	hypertension	DOID:10763	BA00	plasma	29615793	-	upregulation	RT-qPCR	PCR	Low-throughput	These results suggest that hypertension, independent of other cardiometabolic risk factors, adversely affects the circulating profile of a subset of vascular-related miRNAs that have been link to CVD risk and development.	Association between hypertension and circulating vascular-related microRNAs	2018	-
microRNA	Homo sapiens	hsa-miR-34a	MIMAT0000255	obesity	DOID:9970	5B81	plasma	30383229	-	differential expression	microarray/RT-qPCR	microarray;PCR	Low-throughput	Our study has provided evidence that the circulating miRNAs associated with various disorders are dysregulated in women who are obese. We also found that seven of these miRNAs showed levels comparable to those in lean controls after acute weight loss in women who are obese.	Acute Weight Loss Restores Dysregulated Circulating MicroRNAs in Individuals Who Are Obese	2019	-
microRNA	Homo sapiens	hsa-miR-34a-5p	MIMAT0000255	obesity	DOID:9970	5B81	visceral adipose tissue	27480132	SIRT1	association	real-time qPCR	PCR	Low-throughput	We observed obesity-associated downregulation of SIRT1 and upregulation of SIRT7 mRNA levels that were not associated with the methylation status of their promoters. We found a negative correlation between mRNA levels of SIRT1 in VAT of obese individuals and SIRT7 in VAT of the normal-weight subjects and expression of the relevant miRNAs.	SIRT1 and SIRT7 expression in adipose tissues of obese and normal-weight individuals is regulated by microRNAs but not by methylation status	2016	-
microRNA	Homo sapiens	hsa-miR-34c	MIMAT0000686	type 2 diabetes mellitus	DOID:9352	5A11	peripheral blood	28661068	-	downregulation	qRT-PCR	PCR	Low-throughput	MiR-18a and miR-34c in PBMCs may be important marker of stress reaction and may play a role in vulnerability to T2DM as well as IR.	Expression of miR-18a and miR-34c in circulating monocytes associated with vulnerability to type 2 diabetes mellitus and insulin resistance	2017	-
microRNA	Homo sapiens	hsa-miR-34c-5p	MIMAT0000686	type 2 diabetes mellitus	DOID:9352	5A11	serum	26083362	-	upregulation	microarray/RT-qPCR	array;PCR	Low-throughput	The expression profile of microRNAs/mRNAs in monocytes of T2D patients indicates an altered adhesion, differentiation, and shape change potential. Monocyte inflammatory activation was only found in patients with normal serum lipids. Abnormal lipid values coincided with a reduced monocyte inflammatory state.	Type 2 Diabetes Monocyte MicroRNA and mRNA Expression: Dyslipidemia Associates with Increased Differentiation-Related Genes but Not Inflammatory Activation	2015	-
microRNA	Homo sapiens	hsa-miR-361	MIMAT0000703	obesity	DOID:9970	5B81	plasma	29233588	-	association	qPCR	PCR	Low-throughput	An energy-restricted low-glycemic index diet down-regulates circulating miRNA-361 more than an energy-restricted high-glycemic index, regardless of the magnitude of the weight loss.	Changes in circulating miRNAs in healthy overweight and obese subjects: Effect of diet composition and weight loss	2019	-
microRNA	Homo sapiens	hsa-miR-365	MIMAT0000710	obesity	DOID:9970	5B81	brown adipocyte	21743466	Prdm16/Pparα	upregulation	qRT-PCR/luciferase reporter assay/Western blotting	PCR;luciferase assay;Immunoblotting	Low-throughput	Our results demonstrate that Mir193b-365 serves as an essential regulator for brown fat differentiation, in part by repressing myogenesis.	Mir193b-365 is essential for brown fat differentiation	2011	GSE27614
microRNA	Homo sapiens	hsa-miR-369-3p	MIMAT0000721	hyperlipidemia	DOID:1168	5C80.1	peripheral blood	29674246	-	downregulation	microarray/RT-qPCR	microarray;PCR	Low-throughput	This is the first study of miRNA expression analysis of human PBMCs during postprandial hypertriglyceridemia and offers insight into new potential mechanisms by which dietary SFAs influence health or disease.	A microRNA expression signature of the postprandial state in response to a high-saturated-fat challenge	2018	-
microRNA	Homo sapiens	hsa-miR-370	MIMAT0000722	obesity	DOID:9970	5B81	blood	26223376	-	upregulation	real-time qPCR	PCR	Low-throughput	Our findings showed that a significant association is present between circulating miR-370, miR-33, miR-378, miR-27, miR-335, miR-143 and miR-758 values, and childhood obesity. Low levels of miR-335, miR-143 and miR-758, and high levels of miR-27, miR-378, miR-33 and miR-370 may have been responsible for elevated triglycerides and low-density lipoprotein (LDL-C) levels, and low level of high-densi…	The investigation of circulating microRNAs associated with lipid metabolism in childhood obesity	2016	-
microRNA	Homo sapiens	hsa-miR-370	MIMAT0000722	hyperlipidemia	DOID:1168	5C80.1	plasma	22587332	-	upregulation	real-time qPCR	PCR	Low-throughput	Our results suggest that increased plasma levels of miR-122 and miR-370 might be associated with the presence as well as the severity of CAD in hyperlipidemia patients.	Plasma levels of lipometabolism-related miR-122 and miR-370 are increased in patients with hyperlipidemia and associated with coronary artery disease	2012	-
microRNA	Homo sapiens	hsa-miR-370	MIMAT0000722	hypo-HDL cholesterolemia	DOID:1387	5C81.Z	blood	26223376	-	association	real-time qPCR	PCR	Low-throughput	Low levels of miR-335, miR-143 and miR-758, and high levels of miR-27, miR-378, miR-33 and miR-370 may have been responsible for elevated triglycerides and low-density lipoprotein (LDL-C) levels, and low level of high-density lipoprotein (HDL-C) in obese subjects. Therefore, miRNAs may be a good novel biomarker for childhood obesity.	The investigation of circulating microRNAs associated with lipid metabolism in childhood obesity	2016	-
microRNA	Homo sapiens	hsa-miR-370	MIMAT0000722	type 2 diabetes mellitus	DOID:9352	5A11	blood	25978320	-	upregulation	RT-qPCR	PCR	Low-throughput	This study associates the possible role of miRNAs in the diagnosis/prognosis of CAD complication of T2D.	MicroRNAs 9 and 370 Association with Biochemical Markers in T2D and CAD Complication of T2D	2015	-
microRNA	Homo sapiens	hsa-miR-374a-5p	MIMAT0000727	type 2 diabetes mellitus	DOID:9352	5A11	serum	26020947	-	differential expression	qRT-PCR	PCR	Low-throughput	Our findings imply directionality towards biomarker potential of miRNAs in the prevention/diagnosis/treatment outcomes of diabetes.	Circulating MiRNAs of 'Asian Indian Phenotype' Identified in Subjects with Impaired Glucose Tolerance and Patients with Type 2 Diabetes	2015	-
microRNA	Homo sapiens	hsa-miR-374a-5p	MIMAT0000727	obesity	DOID:9970	5B81	serum	29769661	-	association	qPCR	PCR	Low-throughput	In summary, MiR-374a-5p is upregulated in MHO compared to MAO individuals and appears to show association with downregulation of pro-inflammatory markers that are linked to insulin resistance. Given the correlative nature of our findings, functional studies are needed.	Circulating MiR-374a-5p is a potential modulator of the inflammatory process in obesity	2018	-
microRNA	Homo sapiens	hsa-miR-374a-5p	MIMAT0000727	obesity	DOID:9970	5B81	adipose tissue	29280944	-	differential expression	next generation sequencing	sequencing;PCR	High-throughput	NGS-based miRNome analysis characterized changes of the miRNA profile of adipose tissue, which are associated with changes of weight possibly responsible for a differential regulation of molecular pathways in adipose tissue when the individual is obese and after the individual has lost weight.	NGS Reveals Molecular Pathways Affected by Obesity and Weight Loss-Related Changes in miRNA Levels in Adipose Tissue	2017	-
microRNA	Homo sapiens	hsa-miR-374a-5p	MIMAT0000727	type 2 diabetes mellitus	DOID:9352	5A11	serum	26020947	-	differential expression	qRT-PCR	PCR	Low-throughput	Our findings imply directionality towards biomarker potential of miRNAs in the prevention/diagnosis/treatment outcomes of diabetes.	Circulating MiRNAs of 'Asian Indian Phenotype' Identified in Subjects with Impaired Glucose Tolerance and Patients with Type 2 Diabetes	2015	-
microRNA	Homo sapiens	hsa-miR-375	MIMAT0000728	type 2 diabetes mellitus	DOID:9352	5A11	plasma	24366165	-	upregulation	qPCR	PCR	Low-throughput	This study demonstrated for the first time, to the best of our knowledge, that miR-375 is overexpressed in plasma in patients with T2DM, and this may be used as a novel biomarker to distinguish between patients with T2DM and healthy individuals.	Expression and DNA methylation status of microRNA-375 in patients with type 2 diabetes mellitus	2014	-
microRNA	Homo sapiens	hsa-miR-375	MIMAT0000728	type 2 diabetes mellitus	DOID:9352	5A11	plasma	25120598	-	upregulation	qPCR	PCR	Low-throughput	DNA hypomethylation may have an important role in the regulation of miR-375 expression and may contribute to the pathogenesis of T2DM.	DNA methylation of microRNA-375 in impaired glucose tolerance	2014	-
microRNA	Homo sapiens	hsa-miR-375	MIMAT0000728	type 2 diabetes mellitus	DOID:9352	5A11	peripheral blood	29373500	-	upregulation	RT-qPCR	PCR	Low-throughput	These results suggest that miR-375 and miR-9 are associated with the susceptibility to developing T2D and miR-375 alone or in combination with miR-9 could serve as biomarkers for early detection of prediabetes and T2D.	Evaluation of Two-Diabetes Related microRNAs Suitability as Earlier Blood Biomarkers for Detecting Prediabetes and type 2 Diabetes Mellitus	2018	-
microRNA	Homo sapiens	hsa-miR-375	MIMAT0000728	obesity	DOID:9970	5B81	plasma	30383229	-	differential expression	microarray/RT-qPCR	microarray;PCR	Low-throughput	Our study has provided evidence that the circulating miRNAs associated with various disorders are dysregulated in women who are obese. We also found that seven of these miRNAs showed levels comparable to those in lean controls after acute weight loss in women who are obese.	Acute Weight Loss Restores Dysregulated Circulating MicroRNAs in Individuals Who Are Obese	2019	-
microRNA	Homo sapiens	hsa-miR-375	MIMAT0000728	type 2 diabetes mellitus	DOID:9352	5A11	serum	25726255	-	upregulation	Illumina sequencing	sequencing	High-throughput	The present findings demonstrated that the circulating miR-101, miR-375 and miR-802 levels are significantly increased in T2D patients versus NGT subjects and they may become the new biomarkers for type 2 diabetes.	Identification of circulating miR-101, miR-375 and miR-802 as biomarkers for type 2 diabetes	2015	-
microRNA	Homo sapiens	hsa-miR-375	MIMAT0000728	type 2 diabetes mellitus	DOID:9352	5A11	pancreas	20467341	-	upregulation	qRT-PCR	PCR	Low-throughput	Up-regulated microRNA-375 is associated with type 2 diabetes and pancreatic islet amyloid formation and beta-cell deficit. microRNA-375 may serve as a biomarker for known and novel pathways in the pathogenesis of type 2 diabetes related to islet amyloid deposition and beta-cell dysfunction.	Up-regulated pancreatic tissue microRNA-375 associates with human type 2 diabetes through beta-cell deficit and islet amyloid deposition	2010	-
microRNA	Homo sapiens	hsa-miR-375	MIMAT0000728	type 2 diabetes mellitus	DOID:9352	5A11	plasma	24741571	-	upregulation	qRT-PCR	PCR	Low-throughput	These findings indicate that the expression levels of plasma miR-375 and its CpG methylation in the promoter region are ethnically different, which may contribute to the different incidence of diabetes observed in Kazak and Han populations.	Ethnic differences in microRNA-375 expression level and DNA methylation status in type 2 diabetes of Han and Kazak populations	2014	-
microRNA	Homo sapiens	hsa-miR-375	MIMAT0000728	type 2 diabetes mellitus	DOID:9352	5A11	islet	20221699	Mtpn	upregulation	real-time qPCR	PCR	Low-throughput	We verified that miR375 reduced glucose-induced insulin secretion by down-regulating the expression of Mtpn in Nit-1 cells in vitro, suggesting that miR375 has potential therapeutic applications in type II diabetes.	Over-expression of miR375 reduces glucose-induced insulin secretion in Nit-1 cells	2011	-
microRNA	Homo sapiens	hsa-miR-376a	MIMAT0000729	obesity	DOID:9970	5B81	serum	24204780	-	downregulation	RT-qPCR	PCR	Low-throughput	This study is the first to show a panel of serum miRNAs for obesity, and compare them with miRNAs identified in serum for diabetes and obesity with diabetes. Our results support the use of some miRNAs extracted from serum samples as potential predictive tools for obesity and type 2 diabetes.	Serum circulating microRNA profiling for identification of potential type 2 diabetes and obesity biomarkers	2013	-
microRNA	Homo sapiens	hsa-miR-376a	MIMAT0000729	obesity	DOID:9970	5B81	plasma	30383229	-	differential expression	microarray/RT-qPCR	microarray;PCR	Low-throughput	Our study has provided evidence that the circulating miRNAs associated with various disorders are dysregulated in women who are obese. We also found that seven of these miRNAs showed levels comparable to those in lean controls after acute weight loss in women who are obese.	Acute Weight Loss Restores Dysregulated Circulating MicroRNAs in Individuals Who Are Obese	2019	-
microRNA	Homo sapiens	hsa-miR-377	MIMAT0000730	hyperlipidemia	DOID:1168	5C80.1	plasma	30232292	DNMT1/GPIHBP1	downregulation	qPCR/Luciferase reporter assays /Western blot	PCR;Luciferase assay;Immunoblotting	Low-throughput	It is concluded that miR-377 upregulates GPIHBP1 expression, increases the LPL binding to GPIHBP1, and reduces plasma triglyceride levels, likely through targeting DNMT1, inhibiting atherosclerosis in ApoE-KO mice.	MicroRNA-377 Inhibits Atherosclerosis by Regulating Triglyceride Metabolism Through the DNA Methyltransferase 1 in Apolipoprotein E-Knockout Mice	2018	-
microRNA	Homo sapiens	hsa-miR-378	MIMAT0000732	obesity	DOID:9970	5B81	blood	26223376	-	upregulation	real-time qPCR	PCR	Low-throughput	Our findings showed that a significant association is present between circulating miR-370, miR-33, miR-378, miR-27, miR-335, miR-143 and miR-758 values, and childhood obesity. Low levels of miR-335, miR-143 and miR-758, and high levels of miR-27, miR-378, miR-33 and miR-370 may have been responsible for elevated triglycerides and low-density lipoprotein (LDL-C) levels, and low level of high-densi…	The investigation of circulating microRNAs associated with lipid metabolism in childhood obesity	2016	-
microRNA	Homo sapiens	hsa-miR-378	MIMAT0000732	obesity	DOID:9970	5B81	adipocyte	24923530	SREBP/C/EBP	upregulation	real-time PCR/luciferase reporter assays	PCR;luciferase assay	Low-throughput	We found that adipokines and cytokines upregulated miR-378 expression primarily through SREBP and C/EBP binding sites in the miR-378 promoter region.	Insight into the effects of adipose tissue inflammation factors on miR-378 expression and the underlying mechanism	2014	-
microRNA	Homo sapiens	hsa-miR-378	MIMAT0000732	obesity	DOID:9970	5B81	adipocyte	24771406	-	association	-	-	-	We demonstrated that TNF-α, IL-6, and leptin upregulated miR-378 expression indicating that miR-378 probably is a novel mediator in the development of insulin resistance related to obesity.	TNF-α, IL-6, and leptin increase the expression of miR-378, an adipogenesis-related microRNA in human adipocytes	2014	-
microRNA	Homo sapiens	hsa-miR-378	MIMAT0000732	obesity	DOID:9970	5B81	brown adipose tissue	25145289	Pde1b	association	RT-qPCR/luciferase reporter assay/Western blotting	PCR;luciferase assay;Immunoblotting	Low-throughput	Our work identifies miR-378 as a key regulatory component underlying classical BAT-specific expansion and obesity resistance, and adds novel insights into the physiological crosstalk between BAT and WAT.	MicroRNA-378 controls classical brown fat expansion to counteract obesity	2014	-
microRNA	Homo sapiens	hsa-miR-378	MIMAT0000732	hypo-HDL cholesterolemia	DOID:1387	5C81.Z	blood	26223376	-	association	real-time qPCR	PCR	Low-throughput	Low levels of miR-335, miR-143 and miR-758, and high levels of miR-27, miR-378, miR-33 and miR-370 may have been responsible for elevated triglycerides and low-density lipoprotein (LDL-C) levels, and low level of high-density lipoprotein (HDL-C) in obese subjects. Therefore, miRNAs may be a good novel biomarker for childhood obesity.	The investigation of circulating microRNAs associated with lipid metabolism in childhood obesity	2016	-
microRNA	Homo sapiens	hsa-miR-379	MIMAT0000733	obesity	DOID:9970	5B81	liver	25510864	-	upregulation	qRT-PCR/luciferase reporter assay/Western blotting	PCR;luciferase assay;Immunoblotting	Low-throughput	As hepatic miR-379 levels were also correlated with GC and TG levels in human obese patients, the identification of a GC/GR-controlled miRNA cluster not only defines a novel layer of hormone-dependent metabolic control but also paves the way to alternative miRNA-based therapeutic approaches in metabolic dysfunction.	microRNA-379 couples glucocorticoid hormones to dysfunctional lipid homeostasis	2015	-
microRNA	Homo sapiens	hsa-miR-3960	MIMAT0019337	type 2 diabetes mellitus	DOID:9352	5A11	serum	26554942	-	differential expression	microarray/RT-qPCR	array;PCR	Low-throughput	This study provided evidence that serum miRNAs had differential expressions between healthy controls and T2DM patients. These five differential expression miRNAs might be of help for subsequent study in T2DM.	Identification of the differential expression of serum microRNA in type 2 diabetes	2016	-
microRNA	Homo sapiens	hsa-miR-409-3p	MIMAT0001639	type 2 diabetes mellitus	DOID:9352	5A11	serum	28260062	-	downregulation	RT-qPCR	PCR	Low-throughput	In conclusion, the present study demonstrated that serum miRNAs may be novel biomarkers for T2DM and provided novel insights into the pathogenesis of T2DM.	Serum microRNA profiling and bioinformatics analysis of patients with type 2 diabetes mellitus in a Chinese population	2017	-
microRNA	Homo sapiens	hsa-miR-409-3p	MIMAT0001639	type 2 diabetes mellitus	DOID:9352	5A11	plasma	30083267	-	downregulation	qPCR	PCR	Low-throughput	Our results showed differences in the abundance of pro- and anti-angiogenic miRNAs in Ects of patients with T2DM, and are suggestive of mechanisms underlying the development of vascular complications due to impaired angiogenesis in such patients.	Circulating ectosomes: Determination of angiogenic microRNAs in type 2 diabetes	2018	-
microRNA	Homo sapiens	hsa-miR-423-5p	MIMAT0004748	obesity	DOID:9970	5B81	blood	23396142	-	downregulation	microarray/RT-qPCR	microarray;PCR	Low-throughput	Circulating miRNAs are deregulated in severe obesity. Weight loss-induced changes in this profile and the study of in silico targets support this observation and suggest a potential mechanistic relevance.	Targeting the circulating microRNA signature of obesity	2013	-
microRNA	Homo sapiens	hsa-miR-423-5p	MIMAT0004748	obesity	DOID:9970	5B81	plasma	30309709		downregulation	RT-PCR/Immunoassy analysis	PCR;Immunoblotting	Low-throughput	Circulating miRNAs showed significant association with plasma levels of adipokines; adiponectin, leptin, and L/A ratios in adolescents with severe obesity. The study provides that regulation of miRNAs expression is associated with adipokines, and other related MS metabolic factors.	Circulating microRNAs and adipokines as markers of metabolic syndrome in adolescents with obesity	2018	-
microRNA	Homo sapiens	hsa-miR-423-5p	MIMAT0004748	obesity	DOID:9970	5B81	plasma	23928666	-	upregulation	RT-PCR	PCR	Low-throughput	This study provides the first evidence that circulating miRNAs are deregulated in prepubertal obese children. Thus, the very early detection of an abnormal circulating miRNA profile may be a promising strategy to identify obese children who may suffer from metabolic abnormalities.	Changes in circulating microRNAs are associated with childhood obesity	2013	-
microRNA	Homo sapiens	hsa-miR-423-5p	MIMAT0004748	type 2 diabetes mellitus	DOID:9352	5A11	serum	26020947	-	differential expression	qRT-PCR	PCR	Low-throughput	Our findings imply directionality towards biomarker potential of miRNAs in the prevention/diagnosis/treatment outcomes of diabetes.	Circulating MiRNAs of 'Asian Indian Phenotype' Identified in Subjects with Impaired Glucose Tolerance and Patients with Type 2 Diabetes	2015	-
microRNA	Homo sapiens	hsa-miR-424	MIMAT0001341	obesity	DOID:9970	5B81	subcutaneous adipose tissue	30565074	-	association	real-time qPCR	PCR	Low-throughput	These results highlight the importance of miRNA expression in subcutaneous adipose tissue and encourage further investigation of miRNAs as prognostic markers.	Differential expression of miRNAs related to angiogenesis and adipogenesis in subcutaneous fat of obese and nonobese women	2019	-
microRNA	Homo sapiens	hsa-miR-424-5p	MIMAT0001341	obesity	DOID:9970	5B81	subcutaneous adipose tissue	30565074	-	association	real-time qPCR	PCR	Low-throughput	These results highlight the importance of miRNA expression in subcutaneous adipose tissue and encourage further investigation of miRNAs as prognostic markers.	Differential expression of miRNAs related to angiogenesis and adipogenesis in subcutaneous fat of obese and nonobese women	2019	-
microRNA	Homo sapiens	hsa-miR-4269	MIMAT0016897	obesity	DOID:9970	5B81	visceral adipose tissue	25518011	-	downregulation	qRT-PCR	PCR	Low-throughput	These data show that visceral adipocytes shed exosomal-mediators predicted to regulate key end-organ inflammatory and fibrotic signaling pathways.	Adipocyte-derived exosomal miRNAs: a novel mechanism for obesity-related disease	2015	GSE50574
microRNA	Homo sapiens	hsa-miR-431-5p	MIMAT0001625	hypertension	DOID:10763	BA00	vascular smooth muscle	30929512	EHF	upregulation	RNA-seq/knockdown	sequencing;knockdown	High-throughput	In vivo miR-431-5p knockdown delayed Ang II-induced blood pressure elevation and reduced vascular injury in mice, which demonstrated its potential as a target for treatment of hypertension and vascular injury.	miR-431-5p Knockdown Protects Against Angiotensin II-Induced Hypertension and Vascular Injury	2019	-
microRNA	Homo sapiens	hsa-miR-433	MIMAT0001627	obesity	DOID:9970	5B81	plasma	30383229	-	differential expression	microarray/RT-qPCR	microarray;PCR	Low-throughput	Our study has provided evidence that the circulating miRNAs associated with various disorders are dysregulated in women who are obese. We also found that seven of these miRNAs showed levels comparable to those in lean controls after acute weight loss in women who are obese.	Acute Weight Loss Restores Dysregulated Circulating MicroRNAs in Individuals Who Are Obese	2019	-
microRNA	Homo sapiens	hsa-miR-4429	MIMAT0018944	obesity	DOID:9970	5B81	visceral adipose tissue	25518011	-	upregulation	qRT-PCR	PCR	Low-throughput	These data show that visceral adipocytes shed exosomal-mediators predicted to regulate key end-organ inflammatory and fibrotic signaling pathways.	Adipocyte-derived exosomal miRNAs: a novel mechanism for obesity-related disease	2015	GSE50574
microRNA	Homo sapiens	hsa-miR-4463	MIMAT0018987	type 2 diabetes mellitus	DOID:9352	5A11	vascular smooth muscle	30244253	PNUTS	upregulation	qPCR/luciferase reporter assay	PCR;luciferase assays	Low-throughput	Our results suggest that downregulation of miR-4463 attenuates cell apoptosis by directly enhancing PNUTS expression to promote PTEN nuclear localization, subsequently activating AKT signaling pathway in HUVECs under HG and/ or hypoxic conditions.	Downregulation of MicroRNA-4463 Attenuates High-Glucose- and Hypoxia-Induced Endothelial Cell Injury by Targeting PNUTS	2018	-
microRNA	Homo sapiens	hsa-miR-448	MIMAT0001532	obesity	DOID:9970	5B81	peripheral blood	29428938	SIRT1	downregulation	RT-qPCR	PCR	Low-throughput	The results demonstrated that miR-448 and its target gene SIRT1 can serve as prognostic indicators for obese T2DM patients after laparoscopic bariatric surgery.	Expression of MicroRNA-448 and SIRT1 and Prognosis of Obese Type 2 Diabetic Mellitus Patients After Laparoscopic Bariatric Surgery	2018	-
microRNA	Homo sapiens	hsa-miR-448	MIMAT0001532	type 2 diabetes mellitus	DOID:9352	5A11	peripheral blood	29428938	SIRT1	downregulation	RT-qPCR	PCR	Low-throughput	The results demonstrated that miR-448 and its target gene SIRT1 can serve as prognostic indicators for obese T2DM patients after laparoscopic bariatric surgery.	Expression of MicroRNA-448 and SIRT1 and Prognosis of Obese Type 2 Diabetic Mellitus Patients After Laparoscopic Bariatric Surgery	2018	-
microRNA	Homo sapiens	hsa-miR-451	MIMAT0001631	hypertension	DOID:10763	BA00	renal cortex	22042811	-	differential expression	microarray/qRT-PCR/luciferase assays	microarray;PCR;Luciferase assay	Low-throughput	The observed downregulation of 2 miRNAs in hypertension could explain the elevation in intrarenal renin mRNA. Renin, CD36, and other mRNAs, as well as miRNAs and associated pathways identified in the present study, provide novel insights into hypertension etiology.	Gene expression profiling reveals renin mRNA overexpression in human hypertensive kidneys and a role for microRNAs	2011	GSE28260
microRNA	Homo sapiens	hsa-miR-451a	MIMAT0001631	type 2 diabetes mellitus	DOID:9352	5A11	serum	26554942	-	differential expression	microarray/RT-qPCR	array;PCR	Low-throughput	This study provided evidence that serum miRNAs had differential expressions between healthy controls and T2DM patients. These five differential expression miRNAs might be of help for subsequent study in T2DM.	Identification of the differential expression of serum microRNA in type 2 diabetes	2016	-
microRNA	Homo sapiens	hsa-miR-4534	MIMAT0019073	type 2 diabetes mellitus	DOID:9352	5A11	serum	26554942	-	differential expression	microarray/RT-qPCR	array;PCR	Low-throughput	This study provided evidence that serum miRNAs had differential expressions between healthy controls and T2DM patients. These five differential expression miRNAs might be of help for subsequent study in T2DM.	Identification of the differential expression of serum microRNA in type 2 diabetes	2016	-
microRNA	Homo sapiens	hsa-miR-454-3p	MIMAT0003885	type 2 diabetes mellitus	DOID:9352	5A11	serum	28260062	-	upregulation	RT-qPCR	PCR	Low-throughput	In conclusion, the present study demonstrated that serum miRNAs may be novel biomarkers for T2DM and provided novel insights into the pathogenesis of T2DM.	Serum microRNA profiling and bioinformatics analysis of patients with type 2 diabetes mellitus in a Chinese population	2017	-
microRNA	Homo sapiens	hsa-miR-455	MIMAT0003150	obesity	DOID:9970	5B81	brown adipocyte	26303948	HIF1an/Runx1t1/Necdin	upregulation	qRT-PCR/luciferase reporter assay/Western blotting	PCR;luciferase assay;Immunoblotting	Low-throughput	Taken together, the data reveal a novel microRNA-regulated signaling network that controls brown adipogenesis and may be a potential therapeutic target for human metabolic disorders.	MicroRNA-455 regulates brown adipogenesis via a novel HIF1an-AMPK-PGC1α signalling network	2015	-
microRNA	Homo sapiens	hsa-miR-455-5p	MIMAT0003150	type 2 diabetes mellitus	DOID:9352	5A11	serum	28260062	-	upregulation	RT-qPCR	PCR	Low-throughput	In conclusion, the present study demonstrated that serum miRNAs may be novel biomarkers for T2DM and provided novel insights into the pathogenesis of T2DM.	Serum microRNA profiling and bioinformatics analysis of patients with type 2 diabetes mellitus in a Chinese population	2017	-
microRNA	Homo sapiens	hsa-miR-483-5p	MIMAT0004761	obesity	DOID:9970	5B81	serum	30408096	-	association	qPCR	PCR	Low-throughput	In conclusion, miR-483-5p associates with both diabetes and cardiovascular disease. The association with diabetes seems partly mediated by obesity and insulin resistance, whereas the association with incident cardiovascular disease is independent of these metabolic factors and traditional cardiovascular disease risk factors.	miR-483-5p associates with obesity and insulin resistance and independently associates with new onset diabetes mellitus and cardiovascular disease	2018	-
microRNA	Homo sapiens	hsa-miR-485-5p	MIMAT0002175	hyperlipidemia	DOID:1168	5C80.1	liver	24387992	APOA5	association	qRT-PCR/luciferase reporter assays	PCR;Luciferase assay	Low-throughput	We propose that the well-documented hypertriglyceridemic effect of APOA5*2 involves an APOA5 posttranscriptional downregulation mediated by miR-485-5p.	An APOA5 3' UTR variant associated with plasma triglycerides triggers APOA5 downregulation by creating a functional miR-485-5p binding site	2014	-
microRNA	Homo sapiens	hsa-miR-486	MIMAT0002177	type 2 diabetes mellitus	DOID:9352	5A11	serum	28966078	-	upregulation	high-throughput sequencing	sequencing	High-throughput	Our results provide a better understanding of the role of circulating miRNAs, particularly miR-486, miR-146b and miR-15b, in predicting the future risk of T2D in obese children.	Change in circulating microRNA profile of obese children indicates future risk of adult diabetes	2018	-
microRNA	Homo sapiens	hsa-miR-486-3p	MIMAT0004762	obesity	DOID:9970	5B81	plasma	23928666	-	upregulation	RT-PCR	PCR	Low-throughput	This study provides the first evidence that circulating miRNAs are deregulated in prepubertal obese children. Thus, the very early detection of an abnormal circulating miRNA profile may be a promising strategy to identify obese children who may suffer from metabolic abnormalities.	Changes in circulating microRNAs are associated with childhood obesity	2013	-
microRNA	Homo sapiens	hsa-miR-486-5p	MIMAT0002177	obesity	DOID:9970	5B81	plasma	23928666	-	upregulation	RT-PCR	PCR	Low-throughput	This study provides the first evidence that circulating miRNAs are deregulated in prepubertal obese children. Thus, the very early detection of an abnormal circulating miRNA profile may be a promising strategy to identify obese children who may suffer from metabolic abnormalities.	Changes in circulating microRNAs are associated with childhood obesity	2013	-
microRNA	Homo sapiens	hsa-miR-486-5p	MIMAT0002177	type 2 diabetes mellitus	DOID:9352	5A11	serum	30835718	-	differential expression	qRT-PCR	PCR	Low-throughput	Serum miR-99b, miR-486-5p, miR-122-5p, and miR-20a were differentially expressed in patients with T2DM and DKD and should be evaluated further as potential biomarkers for DKD.	Evaluation of Serum microRNAs in Patients with Diabetic Kidney Disease: A Nested Case-Controlled Study and Bioinformatics Analysis	2019	-
microRNA	Homo sapiens	hsa-miR-487b	MIMAT0003180	hypertension	DOID:10763	BA00	arterial cell	24096771	IRS1	upregulation	RT-qPCR/Immunohistochemistry	PCR;Immunoblotting	Low-throughput	Angiotensin II-induced hypertension leads to upregulation of miR-487b, which targets IRS1. Via downregulation of IRS1, miR-487b can contribute to cell death and loss of adventitial and medial integrity during hypertension-induced vascular pathology.	The 14q32 microRNA-487b targets the antiapoptotic insulin receptor substrate 1 in hypertension-induced remodeling of the aorta	2013	-
microRNA	Homo sapiens	hsa-miR-495	MIMAT0002817	type 2 diabetes mellitus	DOID:9352	5A11	islet	24374217	TP53INP1	downregulation	luciferase assays	luciferase assays	Low-throughput	Our results support a role for microRNAs and their epigenetic control by DNA methylation in the pathogenesis of T2DM.	Epigenetic regulation of the DLK1-MEG3 microRNA cluster in human type 2 diabetic islets	2014	GSE52314
microRNA	Homo sapiens	hsa-miR-495	MIMAT0002817	type 2 diabetes mellitus	DOID:9352	5A11	pancreas	26211669	MCT1	association	RT-PCR/luciferase report assays	PCR;luciferase assays	Low-throughput	Our findings support the potential for T2D treatment using the combination of microRNA and hESC differentiated PE cells.	Embryonic stem cell-derived pancreatic endoderm transplant with MCT1-suppressing miR-495 attenuates type II diabetes in mice	2015	-
microRNA	Homo sapiens	hsa-miR-495-3p	MIMAT0002817	hyperlipidemia	DOID:1168	5C80.1	peripheral blood	29674246	-	upregulation	microarray/RT-qPCR	microarray;PCR	Low-throughput	This is the first study of miRNA expression analysis of human PBMCs during postprandial hypertriglyceridemia and offers insight into new potential mechanisms by which dietary SFAs influence health or disease.	A microRNA expression signature of the postprandial state in response to a high-saturated-fat challenge	2018	-
microRNA	Homo sapiens	hsa-miR-499	MIMAT0002870	obesity	DOID:9970	5B81	plasma	30383229	-	differential expression	microarray/RT-qPCR	microarray;PCR	Low-throughput	Our study has provided evidence that the circulating miRNAs associated with various disorders are dysregulated in women who are obese. We also found that seven of these miRNAs showed levels comparable to those in lean controls after acute weight loss in women who are obese.	Acute Weight Loss Restores Dysregulated Circulating MicroRNAs in Individuals Who Are Obese	2019	-
microRNA	Homo sapiens	hsa-miR-499	MIMAT0002870	hypertension	DOID:10763	BA00	peripheral blood	26358152	-	upregulation	RT-PCR	PCR	Low-throughput	Our data reveal that miR-1, miR-133a, miR-26b, miR-208b, miR-499, and miR-21 show distinct expression profiles in hypertensive patients relative to healthy individuals and they are associated with clinical indices of left ventricular hypertrophy in hypertensive patients.	Hypertrophic and antihypertrophic microRNA levels in peripheral blood mononuclear cells and their relationship to left ventricular hypertrophy in patients with essential hypertension	2015	-
microRNA	Homo sapiens	hsa-miR-499a	MIMAT0002870	hypo-HDL cholesterolemia	DOID:1387	5C81.Z	serum	29039586	osbpl1a	association	real-time PCR/luciferase reporter assay/Western blotting	PCR;Luciferase assay;Immunoblotting	Low-throughput	This study validated that rs3746444 polymorphism influenced the expression of miR‑499a, its target gene, osbpl1a, and thereby associated with the HDL level, which makes it a potential factor involved in the mechanism of atherosclerosis.	A single nucleotide polymorphism located in microRNA-499a causes loss of function resulting in increased expression of osbpl1a and reduced serum HDL level	2017	-
microRNA	Homo sapiens	hsa-miR-501-5p	MIMAT0002872	obesity	DOID:9970	5B81	plasma	30651891	-	upregulation	RT-qPCR	PCR	Low-throughput	Our work showed that several circulating miRNAs are differentially represented in overweight/low-grade obesity children and adolescents. Although causal pathways cannot be firmly inferred, it is conceivable that circulating miRNAs may be new biomarkers of early childhood obesity.	Circulating microRNAs are associated with early childhood obesity: results of the I.Family Study	2019	-
microRNA	Homo sapiens	hsa-miR-505	MIMAT0002876	hypertension	DOID:10763	BA00	plasma	25449503	FGF18	upregulation	luciferase assays	luciferase assay	Low-throughput	Our findings indicate that hsa-miR-505 is a novel circulating signature of hypertension, which may play a role in angiogenesis. Our results provide mechanistic insights into hypertension-associated pathogenesis and point hsa-miR-505 as a potential target for intervention of hypertension.	MicroRNA-505 identified from patients with essential hypertension impairs endothelial cell migration and tube formation	2014	-
microRNA	Homo sapiens	hsa-miR-506-3p	MIMAT0002878	hypertension	DOID:10763	BA00	peripheral blood	29456688	BECN1	upregulation	RT-qPCR/luciferase reporter assay/Western blotting	PCR;Luciferase assay;Immunoblotting	Low-throughput	The present study demonstrated that miR-506-3p expression is elevated in the peripheral blood of patients with hypertension and is associated with the severity of hypertension. By downregulating BECN1 expression, miR-506-3p aggravates injury in vascular endothelial cells by inhibiting the proliferation and migration of HUVECs, as well as promoting their apoptosis.	Overexpression of microRNA-506-3p aggravates the injury of vascular endothelial cells in patients with hypertension by downregulating Beclin1 expression	2018	-
microRNA	Homo sapiens	hsa-miR-509-5p	MIMAT0004779	metabolic syndrome	DOID:14221	5A44	blood	23032062	-	association	microarray/RT-qPCR	microarray;PCR	Low-throughput	We have identified miR-197, miR-23a, and miR-509-5p as potential contributors of dyslipidemia in metabolic syndrome (correlation with body mass index; P = 0.029, 0.021, and 0.042, respectively) and miR-130a and miR-195 as contributors of hypertension (correlation with blood pressure; P = 0.019 and 0.045, respectively).	Circulating miRNA profiles in patients with metabolic syndrome	2012	-
microRNA	Homo sapiens	hsa-miR-510	MIMAT0002882	hypertension	DOID:10763	BA00	blood	27881848	-	upregulation	real-time qPCR	PCR	Low-throughput	These results suggested that miR-510 can be used as a novel biomarker for diagnosis and as a new therapeutic target for HTN.	Expression and methylation of circulating microRNA-510 in essential hypertension	2017	-
microRNA	Homo sapiens	hsa-miR-511-5p	MIMAT0002808	type 2 diabetes mellitus	DOID:9352	5A11	plasma	30461200	-	differential expression	microarray/RT-qPCR	array;PCR	Low-throughput	Our findings suggest that genetic polymorphisms of TGFBRAP1 may contribute to the genetic susceptibility of T2DM by mediating diabetes-related miRNA expression.	The variant at TGFBRAP1 is significantly associated with type 2 diabetes mellitus and affects diabetes-related miRNA expression	2019	-
microRNA	Homo sapiens	hsa-miR-519d	MIMAT0002853	obesity	DOID:9970	5B81	plasma	28342299	-	association	qRT-PCR	PCR	Low-throughput	The findings provide evidence that circulating miRNAs play important roles in obesity and weight gain and suggest new targets for understanding the mechanisms of weight gain and developing weight loss intervention strategies.	Plasma MicroRNA signature predicting weight gain among Mexican-American women	2017	-
microRNA	Homo sapiens	hsa-miR-519d	MIMAT0002853	obesity	DOID:9970	5B81	subcutaneous adipose tissue	20057369	PPARA	upregulation	RT-PCR/Western blotting	PCR;Immunoblotting	Low-throughput	we suggest that PPARA loss and miR-519d overexpression could be associated with metabolic imbalance and subsequent adipocyte hypertrophy in SAT during obesity.	miR-519d overexpression is associated with human obesity	2010	GSE12726
microRNA	Homo sapiens	hsa-miR-520c-3p	MIMAT0002846	obesity	DOID:9970	5B81	plasma	30309709		downregulation	RT-PCR/Immunoassy analysis	PCR;Immunoblotting	Low-throughput	Circulating miRNAs showed significant association with plasma levels of adipokines; adiponectin, leptin, and L/A ratios in adolescents with severe obesity. The study provides that regulation of miRNAs expression is associated with adipokines, and other related MS metabolic factors.	Circulating microRNAs and adipokines as markers of metabolic syndrome in adolescents with obesity	2018	-
microRNA	Homo sapiens	hsa-miR-520c-3p	MIMAT0002846	obesity	DOID:9970	5B81	blood	23396142	-	downregulation	microarray/RT-qPCR	microarray;PCR	Low-throughput	Circulating miRNAs are deregulated in severe obesity. Weight loss-induced changes in this profile and the study of in silico targets support this observation and suggest a potential mechanistic relevance.	Targeting the circulating microRNA signature of obesity	2013	-
microRNA	Homo sapiens	hsa-miR-520e	MIMAT0002825	obesity	DOID:9970	5B81	visceral adipose tissue	22537031	RAB11A	association	luciferase assays	luciferase assays	Low-throughput	Both RAB11A and YWHAG proteins are involved in glucose homeostasis; YWHAG is also involved in lipid metabolism. Hence, the identified miRNA/protein target pairs are potential players in the obese phenotype.	miRNA and protein expression profiles of visceral adipose tissue reveal miR-141/YWHAG and miR-520e/RAB11A as two potential miRNA/protein target pairs associated with severe obesity	2012	-
microRNA	Homo sapiens	hsa-miR-522	MIMAT0002868	obesity	DOID:9970	5B81	adipose tissue	21533135	PLIN4	association	RT-PCR/luciferase report assays	PCR;luciferase assays	Low-throughput	Our data showed that a PLIN4 3'UTR luciferase reporter carrying the A allele of rs8887 was reduced in response to miR-522 mimics compared to the G allele. These results suggest variation at the PLIN4 locus, and its interaction with PUFA as a modulator of obesity related phenotypes, acts in part through creation of a miR-522 regulatory site.	The PLIN4 variant rs8887 modulates obesity related phenotypes in humans through creation of a novel miR-522 seed site	2011	-
microRNA	Homo sapiens	hsa-miR-532-5p	MIMAT0002888	obesity	DOID:9970	5B81	blood	23396142	-	downregulation	microarray/RT-qPCR	microarray;PCR	Low-throughput	Circulating miRNAs are deregulated in severe obesity. Weight loss-induced changes in this profile and the study of in silico targets support this observation and suggest a potential mechanistic relevance.	Targeting the circulating microRNA signature of obesity	2013	-
microRNA	Homo sapiens	hsa-miR-532-5p	MIMAT0002888	obesity	DOID:9970	5B81	plasma	30309709		downregulation	RT-PCR/Immunoassy analysis	PCR;Immunoblotting	Low-throughput	Circulating miRNAs showed significant association with plasma levels of adipokines; adiponectin, leptin, and L/A ratios in adolescents with severe obesity. The study provides that regulation of miRNAs expression is associated with adipokines, and other related MS metabolic factors.	Circulating microRNAs and adipokines as markers of metabolic syndrome in adolescents with obesity	2018	-
microRNA	Homo sapiens	hsa-miR-551a	MIMAT0003214	obesity	DOID:9970	5B81	plasma	30651891	-	upregulation	RT-qPCR	PCR	Low-throughput	Our work showed that several circulating miRNAs are differentially represented in overweight/low-grade obesity children and adolescents. Although causal pathways cannot be firmly inferred, it is conceivable that circulating miRNAs may be new biomarkers of early childhood obesity.	Circulating microRNAs are associated with early childhood obesity: results of the I.Family Study	2019	-
microRNA	Homo sapiens	hsa-miR-561	MIMAT0003225	obesity	DOID:9970	5B81	liver	23017470	HSD11B1	association	RT-PCR/luciferase report assays	PCR;luciferase assay	Low-throughput	According to the presented results, miR-561 and -579 are likely to be involved in the tissue-specific regulation of HSD11B1 expression.	Identification of microRNAs as a potential novel regulatory mechanism in HSD11B1 expression	2013	-
microRNA	Homo sapiens	hsa-miR-568	MIMAT0003232	obesity	DOID:9970	5B81	plasma	30383229	-	differential expression	microarray/RT-qPCR	microarray;PCR	Low-throughput	Our study has provided evidence that the circulating miRNAs associated with various disorders are dysregulated in women who are obese. We also found that seven of these miRNAs showed levels comparable to those in lean controls after acute weight loss in women who are obese.	Acute Weight Loss Restores Dysregulated Circulating MicroRNAs in Individuals Who Are Obese	2019	-
microRNA	Homo sapiens	hsa-miR-572	MIMAT0003237	type 2 diabetes mellitus	DOID:9352	5A11	serum	26554942	-	differential expression	microarray/RT-qPCR	array;PCR	Low-throughput	This study provided evidence that serum miRNAs had differential expressions between healthy controls and T2DM patients. These five differential expression miRNAs might be of help for subsequent study in T2DM.	Identification of the differential expression of serum microRNA in type 2 diabetes	2016	-
microRNA	Homo sapiens	hsa-miR-572	MIMAT0003237	type 2 diabetes mellitus	DOID:9352	5A11	plasma	27039347	-	differential expression	qRT-PCR	PCR	Low-throughput	Taken together, our results showed differentially expressed miRNAs in T2D and prediabetes. Plasma hsa-miR-1249, hsa-miR-320b, and hsa-miR-572 may serve as novel biomarkers for diagnosis and potential targets for the treatment for prediabetes and T2D.	Differential expression of microRNAs in plasma of patients with prediabetes and newly diagnosed type 2 diabetes	2016	-
microRNA	Homo sapiens	hsa-miR-574-3p	MIMAT0003239	type 2 diabetes mellitus	DOID:9352	5A11	serum	26779287	-	downregulation	qRT-PCR	PCR	Low-throughput	In circulating monocytes of Ecuadorian T2D patients, the microRNA and gene expression of important inflammatory/chemotactic/motility/vascular repair factors differs from the expression in serum.	Study on inflammation-related genes and microRNAs, with special emphasis on the vascular repair factor HGF and miR-574-3p, in monocytes and serum of patients with T2D	2016	-
microRNA	Homo sapiens	hsa-miR-575	MIMAT0003240	hypertension	DOID:10763	BA00	plasma	30333257	Rab5B	upregulation	real-time qPCR/luciferase reporter assays/Western Blotting	PCR;Luciferase assay;Immunoblotting	Low-throughput	Our results uncover a novel role of miR-575 in endothelial cells, implying a potential biomarker and clinical target for atherosclerosis in hypertensive patients.	MiRNA-575 suppresses angiogenesis by targeting Rab5-MEK-ERK pathway in endothelial cells	2019	-
microRNA	Homo sapiens	hsa-miR-579	MIMAT0003244	obesity	DOID:9970	5B81	liver	23017470	HSD11B1	association	RT-PCR/luciferase report assays	PCR;luciferase assay	Low-throughput	According to the presented results, miR-561 and -579 are likely to be involved in the tissue-specific regulation of HSD11B1 expression.	Identification of microRNAs as a potential novel regulatory mechanism in HSD11B1 expression	2013	-
microRNA	Homo sapiens	hsa-miR-584	MIMAT0003249	hypertension	DOID:10763	BA00	liver	23943853	AGT	association	real-time PCR/luciferase reporter assay/Western blotting	PCR;Luciferase assay;Immunoblotting	Low-throughput	We show here that miR-31 and miR-584 bind strongly to the hAGT 3'-UTR containing 11525C allele compared with 11525A allele. We also show that transfection of miR-31 and miR-584 downregulates the hAGT mRNA and protein levels in human liver cells. These studies may provide new therapeutic approach to reduce hypertension.	Human angiotensinogen +11525 C/A polymorphism modulates its gene expression through microRNA binding	2013	-
microRNA	Homo sapiens	hsa-miR-585-5p	MIMAT0026618	hypertension	DOID:10763	BA00	aortic endothelial cells	28660007	PARP1	differential expression	microarray/luciferase reporter assays	microarray;PCR;Luciferase assay;Immunoblotting	Low-throughput	These findings highlight the role for PARP-1 in regulating oxidative DNA damage in hypertension and identify important new miRNA regulators of PARP-1 expression.	MicroRNAs Modulate Oxidative Stress in Hypertension through PARP-1 Regulation	2017	GSE95431
microRNA	Homo sapiens	hsa-miR-590-3p	MIMAT0004801	hypertension	DOID:10763	BA00	peripheral blood	25977569	FP	association	qRT-PCR/luciferase reporter assays	PCR;Luciferase assay	Low-throughput	rs12731181 in the seed region of the miR-590-3p target site is associated with increased risk of essential hypertension and represents a new paradigm for FP involvement in blood pressure regulation.	Rare SNP rs12731181 in the miR-590-3p Target Site of the Prostaglandin F2α Receptor Gene Confers Risk for Essential Hypertension in the Han Chinese Population	2015	-
microRNA	Homo sapiens	hsa-miR-593	MIMAT0004802	type 2 diabetes mellitus	DOID:9352	5A11	peripheral blood	25912229	-	downregulation	qPCR	PCR	Low-throughput	Our study is one of the pioneer studies showing the differences in peripheral miRNA level in obesity, T2DM and T2DM combined with obesity. The study results suggest the potential utility of miRNAs in the prediction for obesity and T2DM.	Profiling peripheral microRNAs in obesity and type 2 diabetes mellitus	2015	-
microRNA	Homo sapiens	hsa-miR-612	MIMAT0003280	obesity	DOID:9970	5B81	white blood	30089130	TP53	upregulation	microarray/qRT-PCR/luciferase assays	microarray;PCR;luciferase assay	Low-throughput	miR-612 and miR-1976 levels could be prospective biomarkers of response to specific weight-loss diets and might regulate the gene expression of TP53 and CD40.	Implication of miR-612 and miR-1976 in the regulation of TP53 and CD40 and their relationship in the response to specific weight-loss diets	2018	-
microRNA	Homo sapiens	hsa-miR-637	MIMAT0003307	hypertension	DOID:10763	BA00	plasma	25837765	-	upregulation	qRT-PCR	PCR	Low-throughput	We report for the first time a plasma miRNA profile for WCH patients and demonstrate a novel link between miRNA and WCH. These findings may reveal crucial insights into the development of WCH.	Differential expression of hypertension-associated microRNAs in the plasma of patients with white coat hypertension	2015	-
microRNA	Homo sapiens	hsa-miR-638	MIMAT0003308	hypertension	DOID:10763	BA00	medulla	22042811	-	differential expression	microarray/qRT-PCR/luciferase assays	microarray;PCR;Luciferase assay	Low-throughput	The observed downregulation of 2 miRNAs in hypertension could explain the elevation in intrarenal renin mRNA. Renin, CD36, and other mRNAs, as well as miRNAs and associated pathways identified in the present study, provide novel insights into hypertension etiology.	Gene expression profiling reveals renin mRNA overexpression in human hypertensive kidneys and a role for microRNAs	2011	GSE28260
microRNA	Homo sapiens	hsa-miR-642	MIMAT0003312	obesity	DOID:9970	5B81	plasma	30383229	-	differential expression	microarray/RT-qPCR	microarray;PCR	Low-throughput	Our study has provided evidence that the circulating miRNAs associated with various disorders are dysregulated in women who are obese. We also found that seven of these miRNAs showed levels comparable to those in lean controls after acute weight loss in women who are obese.	Acute Weight Loss Restores Dysregulated Circulating MicroRNAs in Individuals Who Are Obese	2019	-
microRNA	Homo sapiens	hsa-miR-642a-3p	MIMAT0020924	obesity	DOID:9970	5B81	adipose tissue	21767385	-	upregulation	RNA-seq/Real-time PCR/Western blotting	sequencing;PCR;Immunoblotting	High-throughput	Overall, our data suggest that the miR-30 family plays a central role in adipocyte development. Moreover, as adipose tissue-derived stem cells can differentiate into either adipocytes or osteoblasts, the down-regulation of the osteogenesis regulator RUNX2 represents a plausible mechanism by which miR-30 miRNAs may contribute to adipogenic differentiation of adipose tissue-derived stem cells.	Small RNA sequencing reveals miR-642a-3p as a novel adipocyte-specific microRNA and miR-30 as a key regulator of human adipogenesis	2011	GSE25715
microRNA	Homo sapiens	hsa-miR-657	MIMAT0003335	type 2 diabetes mellitus	DOID:9352	5A11	hepatocyte	18602895	IGF2R	association	RT-qPCR/luciferase reporter assays	PCR;luciferase assays	Low-throughput	Thus, our findings testify the possibility that the ACAA-insertion/deletion polymorphism may result in the change of IGF2R expression levels at least in part by hsa-miR-657-mediated regulation, contributing to the elucidation for the pathogenesis of type 2 diabetes and raise the possibility that miRNAs or in combination with functional DNA sequence polymorphism may be valuable in the treatment of…	Allele-specific targeting of hsa-miR-657 to human IGF2R creates a potential mechanism underlying the association of ACAA-insertion/deletion polymorphism with type 2 diabetes	2008	-
microRNA	Homo sapiens	hsa-miR-663	MIMAT0003326	hypertension	DOID:10763	BA00	renal cortex	22042811	REN/APOE	differential expression	microarray/qRT-PCR/luciferase assays	microarray;PCR;Luciferase assay	Low-throughput	The observed downregulation of 2 miRNAs in hypertension could explain the elevation in intrarenal renin mRNA. Renin, CD36, and other mRNAs, as well as miRNAs and associated pathways identified in the present study, provide novel insights into hypertension etiology.	Gene expression profiling reveals renin mRNA overexpression in human hypertensive kidneys and a role for microRNAs	2011	GSE28260
microRNA	Homo sapiens	hsa-miR-665	MIMAT0004952	type 2 diabetes mellitus	DOID:9352	5A11	serum	28260062	-	downregulation	RT-qPCR	PCR	Low-throughput	In conclusion, the present study demonstrated that serum miRNAs may be novel biomarkers for T2DM and provided novel insights into the pathogenesis of T2DM.	Serum microRNA profiling and bioinformatics analysis of patients with type 2 diabetes mellitus in a Chinese population	2017	-
microRNA	Homo sapiens	hsa-miR-6835-3p	MIMAT0027571	type 2 diabetes mellitus	DOID:9352	5A11	islet	29916530	AdipoR1	downregulation	RT-qPCR/luciferase reporter assays	PCR;luciferase assays	Low-throughput	The results of the present study suggested that targeting AdipoR1 with miR‑6835‑3p inhibitors may be a potential strategy for promoting glucose‑stimulated insulin secretion, and thereby, may be an effective treatment for type 2‑DM.	miR‑6835‑3p regulates the function of pancreatic islet cells by modulating the expression of AdipoR1	2018	-
microRNA	Homo sapiens	hsa-miR-6835-3p	MIMAT0027571	type 2 diabetes mellitus	DOID:9352	5A11	islet	29916530	AdipoR1	downregulation	RT-qPCR/luciferase reporter assays	PCR;luciferase assays	Low-throughput	The results of the present study suggested that targeting AdipoR1 with miR‑6835‑3p inhibitors may be a potential strategy for promoting glucose‑stimulated insulin secretion, and thereby, may be an effective treatment for type 2‑DM.	miR‑6835‑3p regulates the function of pancreatic islet cells by modulating the expression of AdipoR1	2018	-
microRNA	Homo sapiens	hsa-miR-7	MIMAT0000252	type 2 diabetes mellitus	DOID:9352	5A11	serum	28646700	-	upregulation	RT-qPCR	PCR	Low-throughput	Increased serum miR-7 might have the potential as a promising marker for T2DM and its microvascular complications.	Increased serum miR-7 is a promising biomarker for type 2 diabetes mellitus and its microvascular complications	2017	-
microRNA	Homo sapiens	hsa-miR-720	MI0006654	type 2 diabetes mellitus	DOID:9352	5A11	plasma	30461200	-	differential expression	microarray/RT-qPCR	array;PCR	Low-throughput	Our findings suggest that genetic polymorphisms of TGFBRAP1 may contribute to the genetic susceptibility of T2DM by mediating diabetes-related miRNA expression.	The variant at TGFBRAP1 is significantly associated with type 2 diabetes mellitus and affects diabetes-related miRNA expression	2019	-
microRNA	Homo sapiens	hsa-miR-7-2-3p	MIMAT0004554	hyperlipidemia	DOID:1168	5C80.1	peripheral blood	29674246	-	upregulation	microarray/RT-qPCR	microarray;PCR	Low-throughput	This is the first study of miRNA expression analysis of human PBMCs during postprandial hypertriglyceridemia and offers insight into new potential mechanisms by which dietary SFAs influence health or disease.	A microRNA expression signature of the postprandial state in response to a high-saturated-fat challenge	2018	-
microRNA	Homo sapiens	hsa-miR-758	MIMAT0003879	hypo-HDL cholesterolemia	DOID:1387	5C81.Z	blood	26223376	-	association	real-time qPCR	PCR	Low-throughput	Low levels of miR-335, miR-143 and miR-758, and high levels of miR-27, miR-378, miR-33 and miR-370 may have been responsible for elevated triglycerides and low-density lipoprotein (LDL-C) levels, and low level of high-density lipoprotein (HDL-C) in obese subjects. Therefore, miRNAs may be a good novel biomarker for childhood obesity.	The investigation of circulating microRNAs associated with lipid metabolism in childhood obesity	2016	-
microRNA	Homo sapiens	hsa-miR-758	MIMAT0003879	obesity	DOID:9970	5B81	blood	26223376	-	downregulation	real-time qPCR	PCR	Low-throughput	Our findings showed that a significant association is present between circulating miR-370, miR-33, miR-378, miR-27, miR-335, miR-143 and miR-758 values, and childhood obesity. Low levels of miR-335, miR-143 and miR-758, and high levels of miR-27, miR-378, miR-33 and miR-370 may have been responsible for elevated triglycerides and low-density lipoprotein (LDL-C) levels, and low level of high-densi…	The investigation of circulating microRNAs associated with lipid metabolism in childhood obesity	2016	-
microRNA	Homo sapiens	hsa-miR-758-3p	MIMAT0003879	obesity	DOID:9970	5B81	blood	29507696	CERP/ABCA1	association	qPCR/Immunoblotting	PCR;Immunoblotting	Low-throughput	miR-758-3p holds potential as a blood-based biomarker for distinguishing progression from obesity to metabolic syndrome and as a driver in controlling cholesterol efflux regulatory protein/ATP-binding cassette transporter expression, indicating it potential role in cholesterol control in metabolic syndrome.	miR-758-3p: a blood-based biomarker that's influence on the expression of CERP/ABCA1 may contribute to the progression of obesity to metabolic syndrome	2018	-
microRNA	Homo sapiens	hsa-miR-758-3p	MIMAT0003879	metabolic syndrome	DOID:14221	5A44	plasma	29507696	CERP/ABCA1	association	qPCR/Immunoblotting	PCR;Immunoblotting	Low-throughput	miR-758-3p holds potential as a blood-based biomarker for distinguishing progression from obesity to metabolic syndrome and as a driver in controlling cholesterol efflux regulatory protein/ATP-binding cassette transporter expression, indicating it potential role in cholesterol control in metabolic syndrome.	miR-758-3p: a blood-based biomarker that's influence on the expression of CERP/ABCA1 may contribute to the progression of obesity to metabolic syndrome	2018	-
microRNA	Homo sapiens	hsa-miR-7-5p	MIMAT0000252	hypertension	DOID:10763	BA00	serum	29069223	-	upregulation	RT-PCR	PCR	Low-throughput	RT-PCR analysis of serum samples confirmed that miR-7-5p and miR-26b-5p were upregulated in the serum of LVH hypertensive patients compared with healthy subjects. Our findings suggest that these miRNAs may play a role in the pathogenesis of hypertensive LVH and may represent novel biomarkers for this disease.	MicroRNA profiling identifies miR-7-5p and miR-26b-5p as differentially expressed in hypertensive patients with left ventricular hypertrophy	2017	-
microRNA	Homo sapiens	hsa-miR-766	MIMAT0003888	hypertension	DOID:10763	BA00	adrenocortical cells	25351194	hCyp11B2	association	real-time PCR/luciferase reporter assay/Western blotting	PCR;Luciferase assay;Immunoblotting	Low-throughput	These studies suggest that miR-766 may downregulate the expression of human aldosterone synthase gene and reduce blood pressure in human subjects containing -344T allele.	Human aldosterone synthase gene polymorphism promotes miRNA binding and regulates gene expression	2014	-
microRNA	Homo sapiens	hsa-miR-766-3p	MIMAT0003888	type 2 diabetes mellitus	DOID:9352	5A11	serum	28260062	-	downregulation	RT-qPCR	PCR	Low-throughput	In conclusion, the present study demonstrated that serum miRNAs may be novel biomarkers for T2DM and provided novel insights into the pathogenesis of T2DM.	Serum microRNA profiling and bioinformatics analysis of patients with type 2 diabetes mellitus in a Chinese population	2017	-
microRNA	Homo sapiens	hsa-miR-802	MIMAT0004185	obesity	DOID:9970	5B81	liver	23389544	Hnf1b	upregulation	microarray/qRT-PCR/luciferase assays	microarray;PCR;luciferase assay;Immunoblotting	Low-throughput	Thus, this study defines a critical role for deregulated expression of miR-802 in the development of obesity-associated impairment of glucose metabolism through targeting of Hnf1b, and assigns Hnf1b an unexpected role in the control of hepatic insulin sensitivity.	Obesity-induced overexpression of miR-802 impairs glucose metabolism through silencing of Hnf1b	2013	GSE42188
microRNA	Homo sapiens	hsa-miR-802	MIMAT0004185	type 2 diabetes mellitus	DOID:9352	5A11	serum	25726255	-	upregulation	Illumina sequencing	sequencing	High-throughput	The present findings demonstrated that the circulating miR-101, miR-375 and miR-802 levels are significantly increased in T2D patients versus NGT subjects and they may become the new biomarkers for type 2 diabetes.	Identification of circulating miR-101, miR-375 and miR-802 as biomarkers for type 2 diabetes	2015	-
microRNA	Homo sapiens	hsa-miR-874-3p	MIMAT0004911	obesity	DOID:9970	5B81	plasma	30651891	-	downregulation	RT-qPCR	PCR	Low-throughput	Our work showed that several circulating miRNAs are differentially represented in overweight/low-grade obesity children and adolescents. Although causal pathways cannot be firmly inferred, it is conceivable that circulating miRNAs may be new biomarkers of early childhood obesity.	Circulating microRNAs are associated with early childhood obesity: results of the I.Family Study	2019	-
microRNA	Homo sapiens	hsa-miR-876-3p	MIMAT0004925	obesity	DOID:9970	5B81	adipocyte	30307150	-	association	RNA-seq	sequencing	High-throughput	Our findings thus suggest that modulating miR-876-3p expression could provide novel opportunities for therapeutic intervention of obesity-associated metabolic syndrome.	miR-876-3p regulates glucose homeostasis and insulin sensitivity by targeting adiponectin	2018	-
microRNA	Homo sapiens	hsa-miR-876-3p	MIMAT0004925	obesity	DOID:9970	5B81	adipocyte	29967051	-	association	-	-	-	Our findings thus suggest that modulating miR-876-3p expression could provide novel opportunities for therapeutic intervention of obesity-associated metabolic syndrome.	miR-876-3p regulates glucose homeostasis and insulin sensitivity by targeting adiponectin	2018	-
microRNA	Homo sapiens	hsa-miR-885-5p	MIMAT0004947	hypo-HDL cholesterolemia	DOID:1387	5C81.Z	blood	27917915	-	association	real-time qPCR	PCR	Low-throughput	Hsa-miR-885-5p levels correlated inversely with oxysterol-binding protein 2 (OSBPL2) expression (r = -0.143, p = 1.00 * 10-4) and suppressing the expression of this lipid receptor and sterol transporter could link hsa-miR-885-5p with HDL cholesterol levels.	Blood hsa-miR-122-5p and hsa-miR-885-5p levels associate with fatty liver and related lipoprotein metabolism-The Young Finns Study	2016	-
microRNA	Homo sapiens	hsa-miR-9	MIMAT0000441	hypertension	DOID:10763	BA00	peripheral blood	24794206	-	downregulation	RT-PCR	PCR	Low-throughput	Our data reveal that miR-9 and miR-126 are closely related to essential hypertension in humans, as they show a distinct expression profile in hypertensive patients relative to healthy individuals, and they are associated with clinical prognostic indices of hypertensive target-organ damage in hypertensive patients.	MicroRNA-9 and microRNA-126 expression levels in patients with essential hypertension: potential markers of target-organ damage	2014	-
microRNA	Homo sapiens	hsa-miR-9	MIMAT0000441	type 2 diabetes mellitus	DOID:9352	5A11	blood	25978320	-	upregulation	RT-qPCR	PCR	Low-throughput	This study associates the possible role of miRNAs in the diagnosis/prognosis of CAD complication of T2D.	MicroRNAs 9 and 370 Association with Biochemical Markers in T2D and CAD Complication of T2D	2015	-
microRNA	Homo sapiens	hsa-miR-9	MIMAT0000441	type 2 diabetes mellitus	DOID:9352	5A11	islet	30672723	-	association	-	-	-	In conclusion, we identified a post-transcriptional role for miR-132 in insulin secretion, and demonstrated that systemic antagomir-132 treatment in mice can be used to improve insulin secretion and reduce blood glucose in vivo.	In Vivo Silencing of MicroRNA-132 Reduces Blood Glucose and Improves Insulin Secretion	2019	-
microRNA	Homo sapiens	hsa-miR-92a	MIMAT0000092	hypertension	DOID:10763	BA00	plasma	27629245	-	association	RT-PCR	PCR	Low-throughput	Our data present significant evidence that circulating miR-92a represents a potential noninvasive atherosclerosis marker in essential hypertensive patients.	Circulating miR-92a expression level in patients with essential hypertension: a potential marker of atherosclerosis	2017	-
microRNA	Homo sapiens	hsa-miR-92a	MIMAT0000092	hypo-HDL cholesterolemia	DOID:1387	5C81.Z	whole blood	25415674	-	association	RNA-seq/qRT-PCR	sequencing;PCR	High-throughput	Taken together with existing evidence from mechanistic studies, the current results of our study support a relationship between the miR-17-92 family and lipid metabolism, which merits further study.	Association of plasma MiR-17-92 with dyslipidemia in patients with coronary artery disease	2014	-
microRNA	Homo sapiens	hsa-miR-92a-3p	MIMAT0000092	hypertension	DOID:10763	BA00	plasma	26798072	-	downregulation	qRT-PCR	PCR	Low-throughput	This study showed that hsa-miR-92a-3p, hsa-miR-21-5p, and hsa-miR-16-5p may be used as normalizers for plasma miRNA expression data in essential hypertension studies.	Identification of Suitable Endogenous Normalizers for qRT-PCR Analysis of Plasma microRNA Expression in Essential Hypertension	2016	-
microRNA	Homo sapiens	hsa-miR-93-5p	MIMAT0000093	type 2 diabetes mellitus	DOID:9352	5A11	plasma	30461200	-	differential expression	microarray/RT-qPCR	array;PCR	Low-throughput	Our findings suggest that genetic polymorphisms of TGFBRAP1 may contribute to the genetic susceptibility of T2DM by mediating diabetes-related miRNA expression.	The variant at TGFBRAP1 is significantly associated with type 2 diabetes mellitus and affects diabetes-related miRNA expression	2019	-
microRNA	Homo sapiens	hsa-miR-95-3p	MIMAT0000094	type 2 diabetes mellitus	DOID:9352	5A11	plasma	30083267	-	upregulation	qPCR	PCR	Low-throughput	Our results showed differences in the abundance of pro- and anti-angiogenic miRNAs in Ects of patients with T2DM, and are suggestive of mechanisms underlying the development of vascular complications due to impaired angiogenesis in such patients.	Circulating ectosomes: Determination of angiogenic microRNAs in type 2 diabetes	2018	-
microRNA	Homo sapiens	hsa-miR-9-5p	MIMAT0000441	metabolic syndrome	DOID:14221	5A44	peripheral blood	29584810	ABCA1	association	-	-	-	We identified the NF-κB target miR-9-5p as a negative regulator of ABCA1 adding a novel target pathway in the relationship between inflammation and HDL-driven reverse cholesterol transport for prevention or treatment of atherosclerosis in MS.	Identification of miR-9-5p as direct regulator of ABCA1 and HDL-driven reverse cholesterol transport in circulating CD14+ cells of patients with metabolic syndrome	2018	-
microRNA	Homo sapiens	hsa-miR-9-5p	MIMAT0000441	hypo-HDL cholesterolemia	DOID:1387	5C81.Z	macrophage	29584810	ABCA1	upregulation	luciferase assays	Luciferase assay	Low-throughput	We identified the NF-κB target miR-9-5p as a negative regulator of ABCA1 adding a novel target pathway in the relationship between inflammation and HDL-driven reverse cholesterol transport for prevention or treatment of atherosclerosis in MS.	Identification of miR-9-5p as direct regulator of ABCA1 and HDL-driven reverse cholesterol transport in circulating CD14+ cells of patients with metabolic syndrome	2018	-
microRNA	Homo sapiens	hsa-miR-96	MIMAT0000095	hypo-HDL cholesterolemia	DOID:1387	5C81.Z	hepatocyte	23459944	SR-BI	association	RT-PCR/luciferase report assays/Western blotting	PCR;Luciferase assay;Immunoblotting	Low-throughput	These data suggest that miR-185, miR-96, and miR-223 may repress selective HDL-C uptake through the inhibition of SR-BI in human hepatic cells, implying a novel mode of regulation of hepatic SR-BI and an important role of miRNAs in modulating cholesterol metabolism.	MicroRNAs 185, 96, and 223 repress selective high-density lipoprotein cholesterol uptake through posttranscriptional inhibition	2013	-
microRNA	Homo sapiens	hsa-miR-96-5p	MIMAT0000095	type 2 diabetes mellitus	DOID:9352	5A11	serum	28260062	-	upregulation	RT-qPCR	PCR	Low-throughput	In conclusion, the present study demonstrated that serum miRNAs may be novel biomarkers for T2DM and provided novel insights into the pathogenesis of T2DM.	Serum microRNA profiling and bioinformatics analysis of patients with type 2 diabetes mellitus in a Chinese population	2017	-
microRNA	Homo sapiens	hsa-miR-99b	MIMAT0000689	type 2 diabetes mellitus	DOID:9352	5A11	serum	30835718	-	differential expression	qRT-PCR	PCR	Low-throughput	Serum miR-99b, miR-486-5p, miR-122-5p, and miR-20a were differentially expressed in patients with T2DM and DKD and should be evaluated further as potential biomarkers for DKD.	Evaluation of Serum microRNAs in Patients with Diabetic Kidney Disease: A Nested Case-Controlled Study and Bioinformatics Analysis	2019	-
lncRNA	Rattus norvegicus	IGF2AS	-	type 2 diabetes mellitus	DOID:9352	5A11	myocardial microvascular endothelial cells	28570978	IGF2	upregulation	qRT-PCR	PCR	Low-throughput	IGF2AS inhibition has angiogenic effect in diabetic GK mMVE cells. The functions of IGF2AS in type 2 diabetes are very likely through the inverse regulation of IGF2, but independent of IGF1.	Inhibition of long noncoding RNA IGF2AS promotes angiogenesis in type 2 diabetes	2017	-
lncRNA	Homo sapiens	LINC00523	NONHSAG015917.2	type 2 diabetes mellitus	DOID:9352	5A11	whole blood	30043104	-	downregulation	qRT-PCR	PCR	Low-throughput	Decreased expressions of LncRNAs LINC00523 and LINC00994 in T2DM is possibly associated with pathogenicity of T2DM in Iranian population. Moreover, LINC00523 can perhaps be considered as effective diagnostic biomarkers for T2DM.	Downregulation of long non-coding RNAs LINC00523 and LINC00994 in type 2 diabetes in an Iranian cohort	2018	-
lncRNA	Homo sapiens	LINC00968	NONHSAG050284.2	obesity	DOID:9970	5B81	adipose tissue	29884798	-	upregulation	microarray/RT-qPCR	microarray;qRT-PCR	Low-throughput	This study for the first time identifies an expression profile of differentially expressed lncRNAs in obese children and indicated hub lncRNA RP11-20G13.3 attenuated adipogenesis of preadipocytes, which is conducive to the search for new diagnostic and therapeutic strategies of childhood obesity.	Integrated analysis of long noncoding RNA and mRNA expression profile in children with obesity by microarray analysis	2018	GSE104815
lncRNA	Homo sapiens	LINC00994	NONHSAG035323.2	type 2 diabetes mellitus	DOID:9352	5A11	whole blood	30043104	-	downregulation	qRT-PCR	PCR	Low-throughput	Decreased expressions of LncRNAs LINC00523 and LINC00994 in T2DM is possibly associated with pathogenicity of T2DM in Iranian population. Moreover, LINC00523 can perhaps be considered as effective diagnostic biomarkers for T2DM.	Downregulation of long non-coding RNAs LINC00523 and LINC00994 in type 2 diabetes in an Iranian cohort	2018	-
lncRNA	Homo sapiens	Lnc-Ang362	NONHSAG104186.2	hypertension	DOID:10763	BA00	vascular smooth muscle	23697773	miR-221;miR-222	upregulation	RNA-seq/RT-qPCR/Chromatin Immunoprecipitation (ChIP)	sequencing;PCR;Immunoblotting	High-throughput	We identify an Ang II-regulated lncRNA that is responsible for the production of 2 microRNAs implicated in VSMC proliferation. These newly identified noncoding transcripts could be exploited as novel therapeutic targets for Ang II-associated cardiovascular diseases.	Novel long noncoding RNAs are regulated by angiotensin II in vascular smooth muscle cells	2013	GSE38056
lncRNA	Mus musculus	lnc-BATE1	NONMMUG041536.2	obesity	DOID:9970	5B81	brown adipose tissue	25921091	-	association	RNA-seq/RNA Immunoprecipitation	sequencing;Immunoblotting	High-throughput	Our work provides an annotated catalog for the study of fat depot-selective lncRNAs and establishes lnc-BATE1 as a regulator of BAT development and physiology.	De Novo Reconstruction of Adipose Tissue Transcriptomes Reveals Long Non-coding RNA Regulators of Brown Adipocyte Development	2015	GSE66686
lncRNA	Mus musculus	lnc-BATE10	-	obesity	DOID:9970	5B81	brown adipocyte	28763438	Pgc1α	association	real-time PCR/luciferase reporter assays	sequencing;PCR;luciferase assay;Immunoblotting	High-throughput	Together, these studies provide a comprehensive data framework to interrogate the transcriptomic changes accompanying energy homeostasis transition in adipose tissue.	Dynamic transcriptome changes during adipose tissue energy expenditure reveal critical roles for long noncoding RNA regulators	2017	GSE86338
lncRNA	Homo sapiens	lnc-dPrdm16	LINC00982	obesity	DOID:9970	5B81	brown adipose tissue	29626186	-	upregulation	qRT-PCR/RNA-seq/Western blotting	PCR;sequencing;Immunoblotting	High-throughput	Together, our work provides a comprehensive human adipose catalog built from diverse fat depots and establishes a roadmap to facilitate the discovery of functional lncRNAs in adipocyte development.	De novo reconstruction of human adipose transcriptome reveals conserved lncRNAs as regulators of brown adipogenesis	2018	GSE97205
lncRNA	Rattus norvegicus	lnc-HC	-	metabolic syndrome	DOID:14221	5A44	liver	26663205		upregulation	RT-qPCR/luciferase reporter assays	PCR;luciferase assay;RIP;PULL-DOWN	Low-throughput	These findings suggest a subtle feed-forward regulation of lnc-HC in cholesterol metabolism and define a novel line of evidence by which lncRNAs modulate the metabolic system at the post-transcriptional level.	A novel long noncoding RNA Lnc-HC binds hnRNPA2B1 to regulate expressions of Cyp7a1 and Abca1 in hepatocytic cholesterol metabolism	2016	-
lncRNA	Mus musculus	Lnc-Leptin	-	obesity	DOID:9970	5B81	adipocyte	29519872	leptin	association	RNA-seq/Real-time PCR/Western blotting	PCR;sequencing;Immunoblotting	High-throughput	Direct interaction was detected between DNA loci of Lnc-leptin and Lep in mature adipocytes, which diminished upon Lnc-leptin knockdown. Our study establishes Lnc-leptin as a new regulator of Lep.	Adipocyte Long-Noncoding RNA Transcriptome Analysis of Obese Mice Identified Lnc-Leptin, Which Regulates Leptin	2018	-
lncRNA	Homo sapiens	lncRNA-p19461	-	obesity	DOID:9970	5B81	blood	27767123	-	downregulation	qRT-PCR	PCR	Low-throughput	These results confirm the translational value of the pig for human obesity studies.	Joint Profiling of miRNAs and mRNAs Reveals miRNA Mediated Gene Regulation in the Göttingen Minipig Obesity Model	2016	-
lncRNA	Homo sapiens	lncRNA-p21015	-	obesity	DOID:9970	5B81	blood	27767123	-	downregulation	qRT-PCR	PCR	Low-throughput	These results confirm the translational value of the pig for human obesity studies.	Joint Profiling of miRNAs and mRNAs Reveals miRNA Mediated Gene Regulation in the Göttingen Minipig Obesity Model	2016	-
lncRNA	Homo sapiens	lncRNA-p3134	NONHSAG010871.2	type 2 diabetes mellitus	DOID:9352	5A11	serum	29590649	PI3K/Akt/mTOR	upregulation	microarray/RT-qPCR	microarray;PCR	Low-throughput	Taken together, the results of this study provide new insights into lncRNA-p3134 regulation in pancreatic β cells and provide a better understanding of novel mechanism of glucose homeostasis.	Circulating LncRNAs Analysis in Patients with Type 2 Diabetes Reveals Novel Genes Influencing Glucose Metabolism and Islet β-Cell Function	2018	-
lncRNA	Homo sapiens	lncRNA-p5549	-	obesity	DOID:9970	5B81	blood	27767123	-	downregulation	RT-PCR	PCR	Low-throughput	In summary, circulating lncRNAs are deregulated in obesity. Weight loss-induced changes in this profile support this observation and suggest a potential mechanistic relevance.	Differentially expressed circulating LncRNAs and mRNA identified by microarray analysis in obese patients	2016	-
lncRNA	Mus musculus	lncSHGL	-	type 2 diabetes mellitus	DOID:9352	5A11	liver	29382663	hnRNPA1	downregulation	real-time qPCR	PCR	Low-throughput	In conclusion, lncSHGL is a novel insulin-independent suppressor of hepatic gluconeogenesis and lipogenesis. Activating the lncSHGL/hnRNPA1 axis represents a potential strategy for the treatment of type 2 diabetes and steatosis.	Long Noncoding RNA lncSHGL Recruits hnRNPA1 to Suppress Hepatic Gluconeogenesis and Lipogenesis	2018	-
lncRNA	Mus musculus	lnc-U90926	-	obesity	DOID:9970	5B81	subcutaneous adipose tissue	27780975	PPARγ2/PPARγ	downregulation	qRT-PCR/luciferase reporter assays	PCR;luciferase assay	Low-throughput	Lnc-U90926 attenuates 3T3-L1 adipocyte differentiation via inhibiting the transactivation of PPARγ2 or PPARγ.	The role and possible mechanism of lncRNA U90926 in modulating 3T3-L1 preadipocyte differentiation	2017	-
lncRNA	Mus musculus	LSTR	NONDMEG012058.1	hyperlipidemia	DOID:1168	5C80.1	liver	25738460	TDP-43	association	luciferase assays	Luciferase Assay;pull-down assay;immunoprecipitation;Recombinant protein binding assay	Low-throughput	These data support a model in which lncLSTR regulates a TDP-43/FXR/apoC2-dependent pathway to maintain systemic lipid homeostasis.	A liver-enriched long non-coding RNA, lncLSTR, regulates systemic lipid metabolism in mice	2015	GSE9954
lncRNA	Homo sapiens	LY86-AS1	NONHSAG042927.3	type 2 diabetes mellitus	DOID:9352	5A11	peripheral blood	30328000	-	downregulation	real-time qPCR	PCR	Low-throughput	Lower expression of our two studied long non-coding RNAs LY86-AS1 and HCG27_201 in type 2 diabetes mellitus patients indicates their role in the pathogenesis of T2DM. Furthermore, LY86-AS1 could possibly be used as a diagnostic marker for T2DM.	Long non-coding RNA LY86-AS1 and HCG27_201 expression in type 2 diabetes mellitus	2018	-
lncRNA	Homo sapiens	MEG3	NONHSAG069030.2	metabolic syndrome	DOID:14221	5A44	blood	26898430	miR-140-5p/HDAC7	association	qPCR/luciferase reporter assay	PCR;luciferase assay;RIP	Low-throughput	These findings demonstrated that Pioglitazone up-regulated MEG3 expression to protect EPCs via decreasing miR-140-5p expression and increasing HDAC7 expression in MetS, which may be a novel therapeutic target for preventing and treating MetS.	Pioglitazone up-regulates long non-coding RNA MEG3 to protect endothelial progenitor cells via increasing HDAC7 expression in metabolic syndrome	2016	-
lncRNA	Homo sapiens	MEG3	NONHSAG069030.2	type 2 diabetes mellitus	DOID:9352	5A11	islet	24374217	-	downregulation	qRT-PCR	PCR	Low-throughput	Our results support a role for microRNAs and their epigenetic control by DNA methylation in the pathogenesis of T2DM.	Epigenetic regulation of the DLK1-MEG3 microRNA cluster in human type 2 diabetic islets	2014	GSE52314
lncRNA	Homo sapiens	MEG3	NONHSAG069030.2	type 2 diabetes mellitus	DOID:9352	5A11	whole blood	29981420	-	association	PCR-RFLP	PCR	Low-throughput	Our findings provided the evidence of significant association between H19 rs217727-TT and MEG3 rs7158663-AA genotypes with T2D susceptibility.	Genetic variants in long noncoding RNA H19 and MEG3 confer risk of type 2 diabetes in an Iranian population	2018	-
lncRNA	Mus musculus	MEG3	NONMMUG009962.3	type 2 diabetes mellitus	DOID:9352	5A11	liver	30431065	miR‑214	upregulation	RT-qPCR/luciferase reporter assays	PCR;luciferase assays	Low-throughput	In conclusion, MEG3 promoted hepatic insulin resistance by serving as a ceRNA of miR‑214 to facilitate ATF4 expression. These data provide insight into the molecular mechanism of MEG3 involvement in the development of type 2 diabetes mellitus.	lncRNA MEG3 promotes hepatic insulin resistance by serving as a competing endogenous RNA of miR-214 to regulate ATF4 expression	2019	-
lncRNA	Mus musculus	MEG3	NONMMUG009962.3	type 2 diabetes mellitus	DOID:9352	5A11	islet	26313443	Pdx-1/MafA	downregulation	real-time qPCR	PCR	Low-throughput	These results indicate that Meg3 may function as a new regulator of maintaining beta cells identity via affecting insulin production and cell apoptosis.	Downregulation of Long Noncoding RNA Meg3 Affects Insulin Synthesis and Secretion in Mouse Pancreatic Beta Cells	2016	-
lncRNA	Mus musculus	MEG3	NONMMUG009962.3	type 2 diabetes mellitus	DOID:9352	5A11	liver	26603935	FoxO1	upregulation	real-time qPCR	PCR	Low-throughput	Upregulation of lncRNA MEG3 enhances hepatic insulin resistance via increasing foxO1expression, suggesting that MEG3 may be a potential target and therapeutic strategy for diabetes.	Upregulation of lncRNA MEG3 promotes hepatic insulin resistance via increasing FoxO1 expression	2016	-
lncRNA	Homo sapiens	MHRT	NONHSAG068639.2	hypertension	DOID:10763	BA00	peripheral blood	29917257	-	upregulation	RT-PCR	PCR	Low-throughput	Our data reveal that the lncRNAs MHRT, FENDRR and CARMEN show distinct expression profiles in hypertensive patients and they possibly represent candidate therapeutic targets in hypertensive heart disease.	The long non-coding RNAs MHRT, FENDRR and CARMEN, their expression levels in peripheral blood mononuclear cells in patients with essential hypertension and their relation to heart hypertrophy	2018	-
lncRNA	Mus musculus	MIR155HG	NONMMUG017032.2	obesity	DOID:9970	5B81	preadipocyte	29137239	Sam68	downregulation	RNA-seq/qRT-PCR	sequencing;PCR	High-throughput	Our findings define a new role for Sam68 as a regulator of lncRNAs during adipogenic differentiation.	Transcriptome profiling in preadipocytes identifies long noncoding RNAs as Sam68 targets	2017	-
lncRNA	Homo sapiens	MIR31HG	NONHSAG102572.2	obesity	DOID:9970	5B81	adipocyte	28808264	FABP4	association	qRT-PCR/Western blotting	PCR;Immunoblotting	Low-throughput	These results provide new insights into the molecular mechanisms of MIR31HG in terms of adipogenesis and may have implications for obesity and associated disorders.	Knockdown of lncRNA MIR31HG inhibits adipocyte differentiation of human adipose-derived stem cells via histone modification of FABP4	2017	-
microRNA	Mus musculus	mmu-let-7	MIMAT0000521	type 2 diabetes mellitus	DOID:9352	5A11	islet	30883865	Lin28	association	-	-	-	Our findings suggest that the Lin28/let-7 axis is an important regulator of pancreatic β-cell functions and that precise modulation of this axis may be helpful in treating metabolic diseases such as diabetes.	Lin28a expression protects against streptozotocin-induced β-cell destruction and prevents diabetes in mice	2019	-
microRNA	Mus musculus	mmu-let-7a	MIMAT0000521	type 2 diabetes mellitus	DOID:9352	5A11	muscle tissue	21962509	Lin28	association	qRT-PCR/luciferase reporter assays	PCR;luciferase assays	Low-throughput	These data establish the Lin28/let-7 pathway as a central regulator of mammalian glucose metabolism.	The Lin28/let-7 axis regulates glucose metabolism	2011	-
microRNA	Mus musculus	mmu-let-7f	MIMAT0000525	type 2 diabetes mellitus	DOID:9352	5A11	muscle tissue	21962509	Lin28	association	qRT-PCR/luciferase reporter assays	PCR;luciferase assays	Low-throughput	These data establish the Lin28/let-7 pathway as a central regulator of mammalian glucose metabolism.	The Lin28/let-7 axis regulates glucose metabolism	2011	-
microRNA	Mus musculus	mmu-let-7g	MIMAT0000121	type 2 diabetes mellitus	DOID:9352	5A11	muscle tissue	21962509	Lin28	association	qRT-PCR/luciferase reporter assays	PCR;luciferase assays	Low-throughput	These data establish the Lin28/let-7 pathway as a central regulator of mammalian glucose metabolism.	The Lin28/let-7 axis regulates glucose metabolism	2011	-
microRNA	Mus musculus	mmu-let-7i-5p	MIMAT0000122	obesity	DOID:9970	5B81	adipose tissue	27345691	UCP1	downregulation	microarray /RT-qPCR/ Immunoblotting analysis	microarray;PCR;Immunoblotting	Low-throughput	These results suggest that the miRNAs Let-7i-5p participates in the recruitment and the function of brite adipocytes.	Let-7i-5p represses brite adipocyte function in mice and humans	2016	-
microRNA	Mus musculus	mmu-miR-1	MIMAT0000123	obesity	DOID:9970	5B81	white adipose tissue	22496873	-	downregulation	microarray/RT-qPCR	microarray;PCR	Low-throughput	We show for the first time the up-regulation of mmu-miR-342-3p, mmu-miR-142-3p, mmu-miR-142-5p, mmu-miR-21, mmu-miR-146a, mmu-miR-146b, mmu-miR-379 and the down-regulation of mmu-miR-122, mmu-miR-133b, mmu-miR-1, mmu-miR-30a*, mmu-miR-192 and mmu-miR-203 during the development of obesity.	Differential expression of microRNAs in adipose tissue after long-term high-fat diet-induced obesity in mice	2012	GSE32419
microRNA	Mus musculus	mmu-miR-101	MIMAT0000133	type 2 diabetes mellitus	DOID:9352	5A11	serum	25726255	-	upregulation	Illumina sequencing	sequencing	High-throughput	The present findings demonstrated that the circulating miR-101, miR-375 and miR-802 levels are significantly increased in T2D patients versus NGT subjects and they may become the new biomarkers for type 2 diabetes.	Identification of circulating miR-101, miR-375 and miR-802 as biomarkers for type 2 diabetes	2015	-
microRNA	Mus musculus	mmu-miR-101a-3p	MIMAT0000133	hyperlipidemia	DOID:1168	5C80.1	liver	28284064	IRS-1/SREBP-2/Insig-2/MTTP/ApoB	upregulation	RNA-seq/qRT-PCR	sequencing;PCR	High-throughput	This study presents a comprehensive analysis of a new set of hepatic miRNAs, which were altered by high-fructose diet and provides novel insights into the interaction between miRNAs and their target genes in the development of metabolic syndrome.	Aberrant expression of microRNA induced by high-fructose diet: implications in the pathogenesis of hyperlipidemia and hepatic insulin resistance	2017	-
microRNA	Mus musculus	mmu-miR-103	MIMAT0000546	obesity	DOID:9970	5B81	preadipocyte	19188425	-	upregulation	microarray/RT-qPCR	microarray;PCR	Low-throughput	Our results provide the first experimental evidence for miR-103 function in adipose biology. The remarkable inverse regulatory pattern for many miRNAs during adipogenesis and obesity has important implications for understanding adipose tissue dysfunction in obese mice and humans and the link between chronic inflammation and obesity with insulin resistance.	MicroRNAs induced during adipogenesis that accelerate fat cell development are downregulated in obesity	2009	-
microRNA	Mus musculus	mmu-miR-103	MIMAT0000546	obesity	DOID:9970	5B81	hypothalamus	25100599	-	association	RT-PCR/Immunoassy analysis	PCR;Immunoblotting	Low-throughput	Our data demonstrate in vivo the crucial role of neuronal microRNAs in the control of energy homeostasis.	Hypothalamic miR-103 protects from hyperphagic obesity in mice	2014	-
microRNA	Mus musculus	mmu-miR-103	MIMAT0000546	obesity	DOID:9970	5B81	adipose tissue	28329833	Thy1	association	qPCR/Luciferase reporter assays /Western blot	PCR;luciferase assay;Immunoblotting	Low-throughput	Our results reveal for the first time that Thy1 is a target of TBBPA. Furthermore, our data support the concept that Thy1 is a key marker targeted by environmental chemicals that promote adipogenesis and obesity.	Thy1 (CD90) Expression is Reduced by the Environmental Chemical Tetrabromobisphenol-A to Promote Adipogenesis Through Induction of microRNA-103	2017	-
microRNA	Mus musculus	mmu-miR-103	MIMAT0000546	hyperlipidemia	DOID:1168	5C80.1	endothelial cells	29980665	lncWDR59	association	qPCR/Western blotting	PCR;Immunoblotting	Low-throughput	These data indicate that miR-103 programs ECs toward a maladapted phenotype through targeting of lncWDR59, which may promote atherosclerosis.	miR-103 promotes endothelial maladaptation by targeting lncWDR59	2018	GSE114805
microRNA	Mus musculus	mmu-miR-103	MIMAT0000546	obesity	DOID:9970	5B81	adipocyte	21654750	caveolin-1	upregulation	real-time PCR/luciferase reporter assay/Western blotting	PCR;luciferase assay;Immunoblotting	Low-throughput	These findings demonstrate the central importance of miR-103/107 to insulin sensitivity and identify a new target for the treatment of type 2 diabetes and obesity.	MicroRNAs 103 and 107 regulate insulin sensitivity	2011	-
microRNA	Mus musculus	mmu-miR-106b	MIMAT0000386	type 2 diabetes mellitus	DOID:9352	5A11	skeletal muscle	23954742	Mfn2	upregulation	qRT-PCR/luciferase reporter assays	PCR;luciferase assays	Low-throughput	MiR-106b targeted Mfn2 and regulated skeletal muscle mitochondrial function and insulin sensitivity. Therefore, Inhibition of miR-106b may be a potential new strategy for treating insulin resistance and type 2 diabetes.	MicroRNA-106b induces mitochondrial dysfunction and insulin resistance in C2C12 myotubes by targeting mitofusin-2	2013	-
microRNA	Mus musculus	mmu-miR-107	MIMAT0000647	obesity	DOID:9970	5B81	liver	21120623	FASN	downregulation	microarray/qRT-PCR/Western blotting	microarray;PCR;Immunoblotting	Low-throughput	MiR-107 is downregulated while FASN, a putative target of miR-107, was increased in diet-induced obese mice. These findings provide the evidence of the correlation of miRNAs and their targets in diet-induced obese mice.	Murine hepatic miRNAs expression and regulation of gene expression in diet-induced obese mice	2011	-
microRNA	Mus musculus	mmu-miR-107	MIMAT0000647	obesity	DOID:9970	5B81	adipose tissue	28329833	-	association	qPCR/Luciferase reporter assays /Western blot	PCR;luciferase assay;Immunoblotting	Low-throughput	Our results reveal for the first time that Thy1 is a target of TBBPA. Furthermore, our data support the concept that Thy1 is a key marker targeted by environmental chemicals that promote adipogenesis and obesity.	Thy1 (CD90) Expression is Reduced by the Environmental Chemical Tetrabromobisphenol-A to Promote Adipogenesis Through Induction of microRNA-103	2017	-
microRNA	Mus musculus	mmu-miR-107	MIMAT0000647	obesity	DOID:9970	5B81	adipocyte	21654750	caveolin-1	upregulation	real-time PCR/luciferase reporter assay/Western blotting	PCR;luciferase assay;Immunoblotting	Low-throughput	These findings demonstrate the central importance of miR-103/107 to insulin sensitivity and identify a new target for the treatment of type 2 diabetes and obesity.	MicroRNAs 103 and 107 regulate insulin sensitivity	2011	-
microRNA	Mus musculus	mmu-miR-107	MIMAT0000647	type 2 diabetes mellitus	DOID:9352	5A11	liver	21654750	caveolin-1	upregulation	microarray/RT-qPCR	microarray	Low-throughput	These findings demonstrate the central importance of miR-103/107 to insulin sensitivity and identify a new target for the treatment of type 2 diabetes and obesity.	MicroRNAs 103 and 107 regulate insulin sensitivity	2011	-
microRNA	Mus musculus	mmu-miR-10a	MIMAT0000648	type 2 diabetes mellitus	DOID:9352	5A11	kidney	27292126	CREB1	association	-	-	-	Collectively, these results elucidate that HDAC3/miR-10a/CREB1 serves as a new mechanism underlying kidney injury, providing potential therapeutic targets in type 2 diabetes.	Epigenetic modification of miR-10a regulates renal damage by targeting CREB1 in type 2 diabetes mellitus	2016	-
microRNA	Mus musculus	mmu-miR-10b-5p	MIMAT0000208	type 2 diabetes mellitus	DOID:9352	5A11	liver	30820263	Foxo1/Irs1/Ppp1r3e	downregulation	sequencing/qRT-PCR	sequencing;PCR	High-throughput	Taken together, our results defined miRNA expression signature that may lead to hepatic IR in mice, and the findings provided a foundation for future studies to further explore the effects and underlying mechanisms of the miRNAs and their target genes in the pathogenesis of hepatic IR and related diseases.	High-throughput sequencing of small RNAs and analysis of differentially expressed microRNAs associated with high-fat diet-induced hepatic insulin resistance in mice	2019	-
microRNA	Mus musculus	mmu-miR-10b-5p	MIMAT0000208	obesity	DOID:9970	5B81	adipose tissue	30423386	Apol6	downregulation	qPCR/luciferase reporter assay	PCR;luciferase assay	Low-throughput	These results indicate that miR-10b-5p may have a therapeutic significance for obesity and obesity-related cancers.	miR-10b-5p regulates 3T3-L1 cells differentiation by targeting Apol6	2019	-
microRNA	Mus musculus	mmu-miR-122	MIMAT0000246	type 2 diabetes mellitus	DOID:9352	5A11	liver	27592052	HNF-4α	upregulation	-	-	-	The results indicate that HNF-4α regulated miR-122 contributes to development of the gluconeogenic and lipid metabolism alterations observed in Type 2 diabetic mice and in palmitate-treated HepG2 cells.	HNF-4α regulated miR-122 contributes to development of gluconeogenesis and lipid metabolism disorders in Type 2 diabetic mice and in palmitate-treated HepG2 cells	2016	-
microRNA	Mus musculus	mmu-miR-122	MIMAT0000246	metabolic syndrome	DOID:14221	5A44	plasma	28802563	Agpat1/Dgat1	downregulation	qRT-PCR/luciferase reporter assays	PCR;luciferase assay	Low-throughput	In biochemical and histologic studies of plasma, liver, muscle, and adipose tissues from mice, we found that FFAs increase hepatic expression and secretion of MIR122, which regulates energy storage vs expenditure in liver and peripheral tissues. Strategies to reduce triglyceride levels, by increasing MIR122, might be developed for treatment of metabolic syndrome.	Metabolic Circuit Involving Free Fatty Acids, microRNA 122, and Triglyceride Synthesis in Liver and Muscle Tissues	2017	GSE87848
microRNA	Mus musculus	mmu-miR-122	MIMAT0000246	obesity	DOID:9970	5B81	white adipose tissue	22496873	-	downregulation	microarray/RT-qPCR	microarray;PCR	Low-throughput	We show for the first time the up-regulation of mmu-miR-342-3p, mmu-miR-142-3p, mmu-miR-142-5p, mmu-miR-21, mmu-miR-146a, mmu-miR-146b, mmu-miR-379 and the down-regulation of mmu-miR-122, mmu-miR-133b, mmu-miR-1, mmu-miR-30a*, mmu-miR-192 and mmu-miR-203 during the development of obesity.	Differential expression of microRNAs in adipose tissue after long-term high-fat diet-induced obesity in mice	2012	GSE32419
microRNA	Mus musculus	mmu-miR-122	MIMAT0000246	obesity	DOID:9970	5B81	plasma	30429322	PPARα	upregulation	RT-PCR/Western blotting	PCR;Immunoblotting	Low-throughput	Overall, our data highlight the central role of obesity-associated exosomal miRNAs in the etiopathogeny of glucose intolerance and dyslipidemia.	Obesity-associated exosomal miRNAs modulate glucose and lipid metabolism in mice	2018	-
microRNA	Mus musculus	mmu-miR-125a	MIMAT0000135	obesity	DOID:9970	5B81	adipose tissue	24675842		downregulation	qRT-PCR	PCR	Low-throughput	Our findings indicate that microRNA-125a expression in adipose tissue adapts to IR and may play a role in the development of obesity in mice and obese subjects through uncoupled regulation of the expression of microRNA-125a and its targets.	Visceral Adipose MicroRNA 223 Is Upregulated in Human and Murine Obesity and Modulates the Inflammatory Phenotype of Macrophages	2014	-
microRNA	Mus musculus	mmu-miR-125a-5p	MIMAT0000135	obesity	DOID:9970	5B81	adipose tissue	29393878	STAT3	downregulation	qRT-PCR/luciferase reporter assays	PCR;luciferase assay	Low-throughput	Taken together, our results indicated that miR-125a-5p might promote 3T3-L1 preadipocyte proliferation, whereas inhibiting 3T3-L1 preadipocyte differentiation by negatively regulating STAT3.	MicroRNA-125a-5p Mediates 3T3-L1 Preadipocyte Proliferation and Differentiation	2018	-
microRNA	Mus musculus	mmu-miR-125a-5p	MIMAT0000135	type 2 diabetes mellitus	DOID:9352	5A11	liver	30555566	STAT3	downregulation	qRT-PCR/luciferase reporter assays	PCR;luciferase assays	Low-throughput	Our results confirmed that miR-125a-5p should be considered as a regulator of glycolipid metabolism in T2DM, which can inhibit hepatic lipogenesis and gluconeogenesis and elevate glycogen synthesis by targeting STAT3.	miR-125a-5p ameliorates hepatic glycolipid metabolism disorder in type 2 diabetes mellitus through targeting of STAT3	2018	-
microRNA	Mus musculus	mmu-miR-125b	MIMAT0000136	type 2 diabetes mellitus	DOID:9352	5A11	vascular smooth muscle	20699419	Suv39h1	upregulation	RT-qPCR/luciferase reporter assays	PCR;luciferase assays	Low-throughput	These results demonstrate a novel upstream role for miR-125b in the epigenetic regulation of inflammatory genes in MVSMC of db/db mice through downregulation of Suv39h1.	Enhanced levels of microRNA-125b in vascular smooth muscle cells of diabetic db/db mice lead to increased inflammatory gene expression by targeting the histone methyltransferase Suv39h1	2010	-
microRNA	Mus musculus	mmu-miR-125b-5p	MIMAT0000136	obesity	DOID:9970	5B81	adipose tissue	27656399	-	downregulation	RT-qPCR/Western blotting	PCR;Immunoblotting	Low-throughput	Our results demonstrate that miR-125b-5p plays an important role in the repression of brite adipocyte function by modulating oxygen consumption and mitochondrial gene expression.	miR-125b affects mitochondrial biogenesis and impairs brite adipocyte formation and function	2016	-
microRNA	Mus musculus	mmu-miR-125b-5p	MIMAT0000136	obesity	DOID:9970	5B81	visceral adipose tissue	29507687	-	downregulation	RNA-seq/qRT-PCR	sequencing;PCR	Low-throughput	In conclusion, HFD differentially regulates miRNAs and genes in different adipose depots with significant induction of genes related to lipogenesis, adipogenesis, inflammation, ER stress, and UPR in WAT compared to BAT.	An integrative transcriptomic approach to identify depot differences in genes and microRNAs in adipose tissues from high fat fed mice	2018	GSE85101
microRNA	Mus musculus	mmu-miR-125b-5p	MIMAT0000136	type 2 diabetes mellitus	DOID:9352	5A11	islet	30684546	DACT1	downregulation	-	-	-	The current results suggest that up-regulated miR-125b-5p promotes insulin sensitivity and enhances pancreatic β-cell function through inhibiting the JNK signaling pathway by negatively mediating DACT1.	MicroRNA-125b-5p improves pancreatic β-cell function through inhibiting JNK signaling pathway by targeting DACT1 in mice with type 2 diabetes mellitus	2019	-
microRNA	Mus musculus	mmu-miR-125b-5p	MIMAT0000136	hyperlipidemia	DOID:1168	5C80.1	liver	28284064	IRS-1/SREBP-1c/SREBP-2/Insig-1/Insig-2/ChREBP/ApoB	downregulation	RNA-seq/qRT-PCR	sequencing;PCR	High-throughput	This study presents a comprehensive analysis of a new set of hepatic miRNAs, which were altered by high-fructose diet and provides novel insights into the interaction between miRNAs and their target genes in the development of metabolic syndrome.	Aberrant expression of microRNA induced by high-fructose diet: implications in the pathogenesis of hyperlipidemia and hepatic insulin resistance	2017	-
microRNA	Mus musculus	mmu-miR-126	MIMAT0000138	type 2 diabetes mellitus	DOID:9352	5A11	peripheral blood	25652371	-	upregulation	real-time qPCR	PCR	Low-throughput	Peripheral blood glucose levels in the miR-126 KD mouse were dramatically elevated, which might be related to the pathological changes in the structure of pancreas and liver. These results suggest that miR-126 may play an important role in the metabolism of blood glucose and the development of type 2 diabetes mellitus.	Identification of miR-126 knockdown mouse and the change of blood glucose	2015	-
microRNA	Mus musculus	mmu-miR-126a-3p	MIMAT0000138	hyperlipidemia	DOID:1168	5C80.1	endothelial cells	24584117	Dlk1	association	qRT-PCR/luciferase reporter assay/Western blotting	PCR;Luciferase assay;Immunoblotting	Low-throughput	Administration of miR-126-5p rescued EC proliferation at predilection sites and limited atherosclerosis, introducing a potential therapeutic approach.	MicroRNA-126-5p promotes endothelial proliferation and limits atherosclerosis by suppressing Dlk1	2014	GSE34262
microRNA	Mus musculus	mmu-miR-126a-5p	MIMAT0000137	hyperlipidemia	DOID:1168	5C80.1	endothelial cells	24584117	Dlk1	association	qRT-PCR/luciferase reporter assay/Western blotting	PCR;Luciferase assay;Immunoblotting	Low-throughput	Administration of miR-126-5p rescued EC proliferation at predilection sites and limited atherosclerosis, introducing a potential therapeutic approach.	MicroRNA-126-5p promotes endothelial proliferation and limits atherosclerosis by suppressing Dlk1	2014	GSE34262
microRNA	Mus musculus	mmu-miR-128	MIMAT0000140	type 2 diabetes mellitus	DOID:9352	5A11	serum	26020947	-	differential expression	qRT-PCR	PCR	Low-throughput	Our findings imply directionality towards biomarker potential of miRNAs in the prevention/diagnosis/treatment outcomes of diabetes.	Circulating MiRNAs of 'Asian Indian Phenotype' Identified in Subjects with Impaired Glucose Tolerance and Patients with Type 2 Diabetes	2015	-
microRNA	Mus musculus	mmu-miR-128-3p	MIMAT0000140	hyperlipidemia	DOID:1168	5C80.1	liver	28284064	IRS-1/FOXO1/MTTP	downregulation	RNA-seq/qRT-PCR	sequencing;PCR	High-throughput	This study presents a comprehensive analysis of a new set of hepatic miRNAs, which were altered by high-fructose diet and provides novel insights into the interaction between miRNAs and their target genes in the development of metabolic syndrome.	Aberrant expression of microRNA induced by high-fructose diet: implications in the pathogenesis of hyperlipidemia and hepatic insulin resistance	2017	-
microRNA	Mus musculus	mmu-miR-129	MIMAT0000209	hypertension	DOID:10763	BA00	kidney	28213404	-	downregulation	microarray/qRT-PCR/Western blotting	microarray;PCR;Western blot;Immunohistochemistry	Low-throughput	We identify miR-129 as a potential regulator of blood pressure and H2S regulation.	Hydrogen sulfide alleviates hypertensive kidney dysfunction through an epigenetic mechanism	2017	GSE92857
microRNA	Mus musculus	mmu-miR-129-5p	MIMAT0000209	obesity	DOID:9970	5B81	brown adipose tissue	30261280		association	RNA-seq/qRT-PCR	sequencing;PCR	High-throughput	In conclusion, the depth of transcriptomic and miRNA profiling revealed novel mRNA-miRNA interaction networks in BAT which are involved in thermogenesis, and regulated by EPA.	Transcriptomic and microRNA analyses of gene networks regulated by eicosapentaenoic acid in brown adipose tissue of diet-induced obese mice	2018	-
microRNA	Mus musculus	mmu-miR-130b	MIMAT0000387	obesity	DOID:9970	5B81	epididymal fat	26475357	PPAR-γ	association	real-time PCR/Western blotting	PCR;Immunoblotting	Low-throughput	Our results indicate that miR-130b-MV is able to reduce the epididymal fat deposition and partly restore glucose tolerance, through translational repression of PPAR-γ in a high-fat diet-induced obese mouse model.	Intravenous injection of microvesicle-delivery miR-130b alleviates high-fat diet-induced obesity in C57BL/6 mice through translational repression of PPAR-γ	2015	-
microRNA	Mus musculus	mmu-miR-130b	MIMAT0000387	obesity	DOID:9970	5B81	serum	23868745	PPARGC1A	upregulation	qRT-PCR/luciferase reporter assay/Western blotting	PCR;luciferase assay;Immunoblotting	Low-throughput	Circulating miR-130b reflects the degree of obesity and could serve as a potential biomarker for hypertriacylglycerolaemia and metabolic syndrome. Circulating miR-130b could function as a metabolic mediator for adipose-muscle crosstalk and might be involved in the pathogenesis of obesity-associated metabolic diseases.	Circulating miR-130b mediates metabolic crosstalk between fat and muscle in overweight/obesity	2013	-
microRNA	Mus musculus	mmu-miR-130b	MIMAT0000387	obesity	DOID:9970	5B81	brown adipose tissue	27827997	FTO	downregulation	RT-qPCR	PCR	Low-throughput	We report significant alterations in the morphology of adipose tissue depots and the expression of mRNA and microRNA related to brown adipogenesis and metabolism in Fto-deficient mice.	Fto-Deficiency Affects the Gene and MicroRNA Expression Involved in Brown Adipogenesis and Browning of White Adipose Tissue in Mice	2016	-
microRNA	Mus musculus	mmu-miR-130b-3p	MIMAT0000387	type 2 diabetes mellitus	DOID:9352	5A11	serum	26020947	-	differential expression	qRT-PCR	PCR	Low-throughput	Our findings imply directionality towards biomarker potential of miRNAs in the prevention/diagnosis/treatment outcomes of diabetes.	Circulating MiRNAs of 'Asian Indian Phenotype' Identified in Subjects with Impaired Glucose Tolerance and Patients with Type 2 Diabetes	2015	-
microRNA	Mus musculus	mmu-miR-132	MIMAT0000144	type 2 diabetes mellitus	DOID:9352	5A11	islet	30672723	-	association	-	-	-	In conclusion, we identified a post-transcriptional role for miR-132 in insulin secretion, and demonstrated that systemic antagomir-132 treatment in mice can be used to improve insulin secretion and reduce blood glucose in vivo.	In Vivo Silencing of MicroRNA-132 Reduces Blood Glucose and Improves Insulin Secretion	2019	-
microRNA	Mus musculus	mmu-miR-132-3p	MIMAT0000144	type 2 diabetes mellitus	DOID:9352	5A11	liver	30711402	Mki67/Bbc3	downregulation	microarray/RT-qPCR	microarray;PCR	Low-throughput	Downregulation of miR-132-3p in alpha-cells of obese diabetic mice may constitute a compensatory mechanism contributing to keep glucagon-producing cell number constant in diabetes.	miR-132-3p is a positive regulator of alpha-cell mass and is downregulated in obese hyperglycemic mice	2019	-
microRNA	Mus musculus	mmu-miR-133a	MIMAT0000145	hyperlipidemia	DOID:1168	5C80.1	vascular endothelial cell	27765794	GCH1	association	RT-PCR/Fluorescent Reporter Assay/Western blotting	PCR;Luciferase assay;Immunoblotting	Low-throughput	Statin inhibits aberrant miR-133a expression in the vascular endothelium to prevent endothelial dysfunction by targeting GCH1. Therefore, miR-133a represents an important therapeutic target for preventing cardiovascular diseases.	Inhibition of Aberrant MicroRNA-133a Expression in Endothelial Cells by Statin Prevents Endothelial Dysfunction by Targeting GTP Cyclohydrolase 1 in Vivo	2016	-
microRNA	Mus musculus	mmu-miR-133a	MIMAT0000145	obesity	DOID:9970	5B81	skeletal muscle	23395168	Prdm16	downregulation	RT-qPCR/luciferase reporter assays	PCR;luciferase assay	Low-throughput	microRNA-133 represents an important therapeutic target for the treatment of obesity.	MicroRNA-133 controls brown adipose determination in skeletal muscle satellite cells by targeting Prdm16	2013	-
microRNA	Mus musculus	mmu-miR-133a	MIMAT0000145	obesity	DOID:9970	5B81	adipose tissue	30132867	Prdm16	association	-	-	-	Taken together, we found a novel way to promote browning of white adipocytes through downregulation of miR-133a followed by activation of Prdm16, with a synthetic chemical, reversine.	Reversine promotes browning of white adipocytes by suppressing miR-133a	2019	-
microRNA	Mus musculus	mmu-miR-133b	MIMAT0000769	obesity	DOID:9970	5B81	white adipose tissue	22496873	-	downregulation	microarray/RT-qPCR	microarray;PCR	Low-throughput	We show for the first time the up-regulation of mmu-miR-342-3p, mmu-miR-142-3p, mmu-miR-142-5p, mmu-miR-21, mmu-miR-146a, mmu-miR-146b, mmu-miR-379 and the down-regulation of mmu-miR-122, mmu-miR-133b, mmu-miR-1, mmu-miR-30a*, mmu-miR-192 and mmu-miR-203 during the development of obesity.	Differential expression of microRNAs in adipose tissue after long-term high-fat diet-induced obesity in mice	2012	GSE32419
microRNA	Mus musculus	mmu-miR-133b	MIMAT0000769	obesity	DOID:9970	5B81	skeletal muscle	23395168	Prdm16	downregulation	RT-qPCR/luciferase reporter assays	PCR;luciferase assay	Low-throughput	microRNA-133 represents an important therapeutic target for the treatment of obesity.	MicroRNA-133 controls brown adipose determination in skeletal muscle satellite cells by targeting Prdm16	2013	-
microRNA	Mus musculus	mmu-miR-135a	MIMAT0000147	type 2 diabetes mellitus	DOID:9352	5A11	skeletal muscle	23579070	IRS2	upregulation	microarray/qRT-PCR/luciferase assays	microarray;PCR;luciferase assays	Low-throughput	These suggest that miR-135a targets IRS2 levels by binding to its 3'UTR and this interaction regulates skeletal muscle skeletal muscle insulin signaling.	miR-135a targets IRS2 and regulates insulin signaling and glucose uptake in the diabetic gastrocnemius skeletal muscle	2013	GSE32376
microRNA	Mus musculus	mmu-miR-140	MIMAT0000151	obesity	DOID:9970	5B81	adipocyte	26459763	NEAT1	association	qRT-PCR/luciferase reporter assay/Western blotting	PCR;luciferase assay;Immunoblotting	Low-throughput	Our results reveal an exciting new noncoding RNA signaling network that regulates adipogenesis and that is a potential new target in the prevention or treatment of obesity.	MicroRNA 140 Promotes Expression of Long Noncoding RNA NEAT1 in Adipogenesis	2015	-
microRNA	Mus musculus	mmu-miR-140-5p	MIMAT0000151	hypertension	DOID:10763	BA00	blood	30483753	Nrf2/Sirt2	downregulation	microarray/luciferase reporter assays	microarray;PCR;Luciferase assay;Immunoblotting	Low-throughput	These results suggested that miR‑140‑5p aggravated hypertension and oxidative stress of mice with atherosclerosis by targeting Nrf2 and Sirt2.	MicroRNA-140-5p aggravates hypertension and oxidative stress of atherosclerosis via targeting Nrf2 and Sirt2	2019	-
microRNA	Mus musculus	mmu-miR-141	MIMAT0000153	type 2 diabetes mellitus	DOID:9352	5A11	-	29620270	FOXA2	upregulation	RT-qPCR/luciferase reporter assays	PCR;luciferase assays	Low-throughput	In conclusion, the results of the present study indicate that the pioglitazone/miR‑141/FOXA2 axis may represent a promising target mechanism for T2D treatment.	Pioglitazone/microRNA‑141/FOXA2: A novel axis in pancreatic β‑cells proliferation and insulin secretion	2018	-
microRNA	Mus musculus	mmu-miR-141-3p	MIMAT0000153	obesity	DOID:9970	5B81	liver	26548909	PTEN	upregulation	qRT-PCR/luciferase reporter assays	PCR;luciferase assay	Low-throughput	Our study suggested that mitochondria-related miR-141-3p induced mitochondrial dysfunction by inhibiting PTEN.	Mitochondria-related miR-141-3p contributes to mitochondrial dysfunction in HFD-induced obesity by inhibiting PTEN	2015	-
microRNA	Mus musculus	mmu-miR-141-3p	MIMAT0000153	obesity	DOID:9970	5B81	adipose tissue	30745826	-	downregulation	real-time PCR/luciferase reporter assays	sequencing;PCR;luciferase assay;Immunoblotting	High-throughput	Our study may certify a novel mechanism that the secretion of "harmful" exosomes from obesity adipose tissues cause insulin resistance.	Exosomal transfer of obesity adipose tissue for decreased miR-141-3p mediate insulin resistance of hepatocytes	2019	-
microRNA	Mus musculus	mmu-miR-142-3p	MIMAT0000155	obesity	DOID:9970	5B81	white adipose tissue	22496873	-	upregulation	microarray/RT-qPCR	microarray;PCR	Low-throughput	We show for the first time the up-regulation of mmu-miR-342-3p, mmu-miR-142-3p, mmu-miR-142-5p, mmu-miR-21, mmu-miR-146a, mmu-miR-146b, mmu-miR-379 and the down-regulation of mmu-miR-122, mmu-miR-133b, mmu-miR-1, mmu-miR-30a*, mmu-miR-192 and mmu-miR-203 during the development of obesity.	Differential expression of microRNAs in adipose tissue after long-term high-fat diet-induced obesity in mice	2012	GSE32419
microRNA	Mus musculus	mmu-miR-142-5p	MIMAT0000154	obesity	DOID:9970	5B81	white adipose tissue	22496873	-	upregulation	microarray/RT-qPCR	microarray;PCR	Low-throughput	We show for the first time the up-regulation of mmu-miR-342-3p, mmu-miR-142-3p, mmu-miR-142-5p, mmu-miR-21, mmu-miR-146a, mmu-miR-146b, mmu-miR-379 and the down-regulation of mmu-miR-122, mmu-miR-133b, mmu-miR-1, mmu-miR-30a*, mmu-miR-192 and mmu-miR-203 during the development of obesity.	Differential expression of microRNAs in adipose tissue after long-term high-fat diet-induced obesity in mice	2012	GSE32419
microRNA	Mus musculus	mmu-miR-142a-5p	MIMAT0000154	hyperlipidemia	DOID:1168	5C80.1	liver	29197188	Srebp-1c	association	qRT-PCR/luciferase reporter assay/Western blotting	PCR;Luciferase assay;Immunoblotting	Low-throughput	Our data demonstrated that GNP effectively antagonized HFD-induced hyperlipidemia and hepatic lipid accumulation in mice. Such effects were achieved by regulating miR-142a-5p/SREBP-1c axis.	Genipin alleviates high-fat diet-induced hyperlipidemia and hepatic lipid accumulation in mice via miR-142a-5p/SREBP-1c axis	2018	-
microRNA	Mus musculus	mmu-miR-143	MIMAT0000247	obesity	DOID:9970	5B81	preadipocyte	19188425	-	upregulation	microarray/RT-qPCR	microarray;PCR	Low-throughput	Our results provide the first experimental evidence for miR-103 function in adipose biology. The remarkable inverse regulatory pattern for many miRNAs during adipogenesis and obesity has important implications for understanding adipose tissue dysfunction in obese mice and humans and the link between chronic inflammation and obesity with insulin resistance.	MicroRNAs induced during adipogenesis that accelerate fat cell development are downregulated in obesity	2009	-
microRNA	Mus musculus	mmu-miR-143	MIMAT0000247	obesity	DOID:9970	5B81	adipose tissue	18809385	-	upregulation	-	-	-	These findings provide the first evidence for the up-regulated expression of miR-143 in the mesenteric fat of high-fat diet-induced obese mice, which might contribute to the regulated expression of adipocyte genes involved in the pathophysiology of obesity.	Up-regulated expression of microRNA-143 in association with obesity in adipose tissue of mice fed high-fat diet	2008	-
microRNA	Mus musculus	mmu-miR-143	MIMAT0000247	obesity	DOID:9970	5B81	liver	21441927	ORP8	upregulation	qRT-PCR/Western blotting	PCR;Immunoblotting	Low-throughput	Our experiments provide direct evidence that dysregulated post-transcriptional gene silencing contributes to the development of obesity-induced insulin resistance, and characterize the miR-143-ORP8 pathway as a potential target for the treatment of obesity-associated diabetes.	Obesity-induced overexpression of miRNA-143 inhibits insulin-stimulated AKT activation and impairs glucose metabolism	2011	GSE26460
microRNA	Mus musculus	mmu-miR-143	MIMAT0000247	obesity	DOID:9970	5B81	adipocyte	28495174	PPARγ	association	luciferase assays	luciferase assay	Low-throughput	These results suggested that a PPARγ-mediated GPR120 signaling pathway promotes transcriptional activation of miR-143 in adipocytes.	PPARγ-mediated G-protein coupled receptor 120 signaling pathway promotes transcriptional activation of miR-143 in adipocytes	2017	-
microRNA	Mus musculus	mmu-miR-143-3p	MIMAT0000247	obesity	DOID:9970	5B81	visceral adipose tissue	29507687	-	upregulation	RNA-seq/qRT-PCR	sequencing;PCR	Low-throughput	In conclusion, HFD differentially regulates miRNAs and genes in different adipose depots with significant induction of genes related to lipogenesis, adipogenesis, inflammation, ER stress, and UPR in WAT compared to BAT.	An integrative transcriptomic approach to identify depot differences in genes and microRNAs in adipose tissues from high fat fed mice	2018	GSE85101
microRNA	Mus musculus	mmu-miR-143-3p	MIMAT0000247	obesity	DOID:9970	5B81	adipose tissue	30243086	PPARγ/MAPK7	upregulation	qRT-PCR/luciferase reporter assays	PCR;luciferase assay	Low-throughput	Taken together, these results indicated that as a regulator of PPARγ, miR-143a-3p play an important role in adipogenesis via regulating MAPK7 and fatty acid.	MicroRNA-143a-3p modulates preadipocyte proliferation and differentiation by targeting MAPK7	2018	-
microRNA	Mus musculus	mmu-miR-144	MIMAT0000156	hypo-HDL cholesterolemia	DOID:1387	5C81.Z	liver	23519696	ABCA1/FXR	upregulation	real-time PCR/luciferase reporter assay/Western blotting	PCR;Luciferase assay;Immunoblotting	Low-throughput	We have identified a novel pathway involving FXR, miR-144, and ABCA1 that together regulate plasma HDL-cholesterol.	MicroRNA-144 regulates hepatic ATP binding cassette transporter A1 and plasma high-density lipoprotein after activation of the nuclear receptor farnesoid X receptor	2013	-
microRNA	Mus musculus	mmu-miR-144	MIMAT0000156	hypo-HDL cholesterolemia	DOID:1387	5C81.Z	liver	23519695	ABCA1	upregulation	microarray/qRT-PCR/luciferase assays	microarray;PCR;Luciferase assay;Immunoblotting	Low-throughput	miR-144 regulates cholesterol metabolism via suppressing ABCA1 expression and modulation of miRNAs may represent a potential therapeutical intervention for treating dyslipidemia and atherosclerotic vascular disease.	Control of cholesterol metabolism and plasma high-density lipoprotein levels by microRNA-144	2013	-
microRNA	Mus musculus	mmu-miR-144-3p	MIMAT0000156	obesity	DOID:9970	5B81	preadipocyte	30619490	Klf3/CtBP2	upregulation	qRT-PCR/luciferase reporter assay/Western blotting	PCR;luciferase assay;Immunoblotting	Low-throughput	Taken together, these results support that miR-144-3p can facilitate adipogenesis both in vitro and in vivo, which implies that miR-144-3p could be a target for therapeutic intervention in obesity and metabolic syndrome in the future.	miR-144-3p Promotes Adipogenesis Through Releasing C/EBPα From Klf3 and CtBP2	2018	-
microRNA	Mus musculus	mmu-miR-144-3p	MIMAT0000156	hypo-HDL cholesterolemia	DOID:1387	5C81.Z	serum	24733347	ABCA1	association	real-time qPCR/luciferase reporter assays/Western Blotting	PCR;Luciferase assay;Immunoblotting	Low-throughput	Our findings clearly indicate that miR-144-3p is essential for the regulation of cholesterol homeostasis and inflammatory reactions, supporting its utility as a potential therapeutic target of atherosclerosis and a promising diagnostic biomarker of AMI.	An agomir of miR-144-3p accelerates plaque formation through impairing reverse cholesterol transport and promoting pro-inflammatory cytokine production	2014	-
microRNA	Mus musculus	mmu-miR-145	MIMAT0000157	obesity	DOID:9970	5B81	liver	21441927	-	upregulation	qRT-PCR/Western blotting	PCR;Immunoblotting	Low-throughput	Our experiments provide direct evidence that dysregulated post-transcriptional gene silencing contributes to the development of obesity-induced insulin resistance, and characterize the miR-143-ORP8 pathway as a potential target for the treatment of obesity-associated diabetes.	Obesity-induced overexpression of miRNA-143 inhibits insulin-stimulated AKT activation and impairs glucose metabolism	2011	GSE26460
microRNA	Mus musculus	mmu-miR-145a-3p	MIMAT0004534	hyperlipidemia	DOID:1168	5C80.1	liver	28284064	IRS-1/FOXO1/MTTP/ChREBP/ApoB	downregulation	RNA-seq/qRT-PCR	sequencing;PCR	High-throughput	This study presents a comprehensive analysis of a new set of hepatic miRNAs, which were altered by high-fructose diet and provides novel insights into the interaction between miRNAs and their target genes in the development of metabolic syndrome.	Aberrant expression of microRNA induced by high-fructose diet: implications in the pathogenesis of hyperlipidemia and hepatic insulin resistance	2017	-
microRNA	Mus musculus	mmu-miR-146	MIMAT0000158	type 2 diabetes mellitus	DOID:9352	5A11	islet	18633110	-	upregulation	qRT-PCR/luciferase reporter assays	PCR;luciferase assays	Low-throughput	Our findings suggest that at least part of the detrimental effects of palmitate on beta-cells is caused by alterations in the level of specific miRNAs.	Alterations in microRNA expression contribute to fatty acid-induced pancreatic beta-cell dysfunction	2008	-
microRNA	Mus musculus	mmu-miR-146a	MIMAT0000158	obesity	DOID:9970	5B81	white adipose tissue	22496873	-	upregulation	microarray/RT-qPCR	microarray;PCR	Low-throughput	We show for the first time the up-regulation of mmu-miR-342-3p, mmu-miR-142-3p, mmu-miR-142-5p, mmu-miR-21, mmu-miR-146a, mmu-miR-146b, mmu-miR-379 and the down-regulation of mmu-miR-122, mmu-miR-133b, mmu-miR-1, mmu-miR-30a*, mmu-miR-192 and mmu-miR-203 during the development of obesity.	Differential expression of microRNAs in adipose tissue after long-term high-fat diet-induced obesity in mice	2012	GSE32419
microRNA	Mus musculus	mmu-miR-146a	MIMAT0000158	obesity	DOID:9970	5B81	adipose tissue	30768595	Traf6	downregulation	RNA-seq/qRT-PCR	sequencing;qRT-PCR	High-throughput	Our study provides evidence that miR-146a represses inflammation and diet-induced obesity and regulates metabolic processes at the cellular and organismal levels, demonstrating how the combination of diet and miRNA genetics influences obesity and diabetic phenotypes.	Anti-inflammatory microRNA-146a protects mice from diet-induced metabolic disease	2019	GSE119703
microRNA	Mus musculus	mmu-miR-146b	MIMAT0003475	obesity	DOID:9970	5B81	liver	28576870	TRb	association	next generation sequencing	sequencing;PCR	High-throughput	These findings suggested that miR-383 and miR-146b might play critical roles in different propensities to diet-induced obesity via targeting on Dio1 and TRb, respectively.	Role of miR-383 and miR-146b in different propensities to obesity in male mice	2017	-
microRNA	Mus musculus	mmu-miR-146b	MIMAT0003475	obesity	DOID:9970	5B81	white adipose tissue	28445161	SIRT1	upregulation	qRT-PCR/Immunoprecipitation	PCR;Immunoprecipitation	Low-throughput	These findings indicate that zerumbone ameliorated diet-induced obesity and inhibited adipogenesis, and that the underlying mechanisms involved AMPK and the microRNA-146b/SIRT1 pathway.	Zerumbone ameliorates high-fat diet-induced adiposity by restoring AMPK-regulated lipogenesis and microRNA-146b/SIRT1-mediated adipogenesis	2017	-
microRNA	Mus musculus	mmu-miR-146b	MIMAT0003475	obesity	DOID:9970	5B81	white adipose tissue	22496873	-	upregulation	microarray/RT-qPCR	microarray;PCR	Low-throughput	We show for the first time the up-regulation of mmu-miR-342-3p, mmu-miR-142-3p, mmu-miR-142-5p, mmu-miR-21, mmu-miR-146a, mmu-miR-146b, mmu-miR-379 and the down-regulation of mmu-miR-122, mmu-miR-133b, mmu-miR-1, mmu-miR-30a*, mmu-miR-192 and mmu-miR-203 during the development of obesity.	Differential expression of microRNAs in adipose tissue after long-term high-fat diet-induced obesity in mice	2012	GSE32419
microRNA	Mus musculus	mmu-miR-146b	MIMAT0003475	obesity	DOID:9970	5B81	adipose tissue	24009212	SIRT1	upregulation	qRT-PCR/luciferase reporter assay/Western blotting	PCR;luciferase assay;Immunoblotting	Low-throughput	Therefore, the miR-146b/SIRT1 pathway could be a potential target for obesity prevention and treatment.	MicroRNA-146b promotes adipogenesis by suppressing the SIRT1-FOXO1 cascade	2013	-
microRNA	Mus musculus	mmu-miR-148a	MIMAT0000516	obesity	DOID:9970	5B81	adipose tissue	26001136	Wnt1	upregulation	qRT-PCR/luciferase reporter assay/Western blotting	PCR;luciferase assay;Immunoblotting	Low-throughput	The results suggest that miR-148a is a biomarker of obesity in human subjects and mouse model, which represents a CREB-modulated miRNA that acts to repress Wnt1, thereby promoting adipocyte differentiation.	miR-148a is Associated with Obesity and Modulates Adipocyte Differentiation of Mesenchymal Stem Cells through Wnt Signaling	2015	-
microRNA	Mus musculus	mmu-miR-149	MIMAT0000159	obesity	DOID:9970	5B81	skeletal muscle	24757201	PARP-2/SIRT-1	downregulation	qPCR/luciferase reporter assay	PCR;luciferase assay	Low-throughput	Overall, miR-149 may be therapeutically useful for treating HFD-induced skeletal muscle metabolic disorders in such pathophysiological conditions as obesity and type 2 diabetes.	MicroRNA-149 inhibits PARP-2 and promotes mitochondrial biogenesis via SIRT-1/PGC-1α network in skeletal muscle	2014	-
microRNA	Mus musculus	mmu-miR-149-5p	MIMAT0000159	type 2 diabetes mellitus	DOID:9352	5A11	liver	30820263	Crtc2/Ptpn11/Insr/Stat3/Rps6kb2/Pik3r1	upregulation	sequencing/qRT-PCR	sequencing;PCR	High-throughput	Taken together, our results defined miRNA expression signature that may lead to hepatic IR in mice, and the findings provided a foundation for future studies to further explore the effects and underlying mechanisms of the miRNAs and their target genes in the pathogenesis of hepatic IR and related diseases.	High-throughput sequencing of small RNAs and analysis of differentially expressed microRNAs associated with high-fat diet-induced hepatic insulin resistance in mice	2019	-
microRNA	Mus musculus	mmu-miR-150	MIMAT0000160	obesity	DOID:9970	5B81	adipose tissue	29352962	mTOR/PGC-1α	association	qRT-PCR/Western blotting	PCR	Low-throughput	miR-150 KO mice showed metabolic benefits accompanied by reduced body weight, decreased energy intake, and enhanced lipid metabolism. miR-150 may represent both a biomarker and novel therapeutic target regarding obesity and insulin resistance.	Improved systemic metabolism and adipocyte biology in miR-150 knockout mice	2018	-
microRNA	Mus musculus	mmu-miR-150	MIMAT0000160	obesity	DOID:9970	5B81	white adipose tissue	24722250	Prdm16/Ppargc1a	association	qRT-PCR/luciferase reporter assays	PCR;luciferase assay	Low-throughput	This study reveals the in vivo function of KSRP in controlling brown-like transformation of iWAT through post-transcriptional regulation of miR-150 expression.	KSRP ablation enhances brown fat gene program in white adipose tissue through reduced miR-150 expression	2014	-
microRNA	Mus musculus	mmu-miR-152	MIMAT0000162	type 2 diabetes mellitus	DOID:9352	5A11	liver	26996529	PTEN	downregulation	real-time PCR/luciferase reporter assays	PCR;luciferase assays	Low-throughput	Downregulated miR-152 induced impaired hepatic glycogenesis by targeting PTEN. PTEN participated in miR-152-mediated glycogenesis in hepatocytes via regulation of the AKT/GSK pathway.	MicroRNA 152 regulates hepatic glycogenesis by targeting PTEN	2016	-
microRNA	Mus musculus	mmu-miR-155	MIMAT0000165	obesity	DOID:9970	5B81	adipose tissue	26829440	PPARγ	upregulation	qPCR/luciferase reporter assay	PCR;luciferase assay	Low-throughput	Altogether, these data are evidence of a proinflammatory loop mediated by NF-κB and miR-155 that could participate in the amplification of inflammatory status in adipocytes.	Obesity-associated Inflammation Induces microRNA-155 Expression in Adipocytes and Adipose Tissue: Outcome on Adipocyte Function	2016	-
microRNA	Mus musculus	mmu-miR-155	MIMAT0000165	obesity	DOID:9970	5B81	adipose tissue	26953132	-	association	RT-qPCR	PCR	Low-throughput	Our results identify miR-155 as a novel candidate target for improving obesity resistance.	miR-155 Deletion in Female Mice Prevents Diet-Induced Obesity	2016	-
microRNA	Mus musculus	mmu-miR-155-5p	MIMAT0000165	hyperlipidemia	DOID:1168	5C80.1	islet	28970282	IL-6	association	qPCR/Transfection	PCR;Transfection	Low-throughput	Induction of miR-155-5p expression in β-cells by hyperlipidemia-associated endotoxemia improves the adaptation of β-cells to insulin resistance and represents a protective mechanism in the islet stress response.	Hyperlipidemia-Induced MicroRNA-155-5p Improves β-Cell Function by Targeting Mafb	2017	-
microRNA	Mus musculus	mmu-miR-15b	MIMAT0000124	obesity	DOID:9970	5B81	liver	26179126	INSR	upregulation	qRT-PCR/luciferase reporter assays	PCR;luciferase assay	Low-throughput	These results unveil a novel mechanism whereby miR-15b is linked causally to the pathogenesis of hepatic insulin resistance in SFA-induced obesity.	Obesity-induced miR-15b is linked causally to the development of insulin resistance through the repression of the insulin receptor in hepatocytes	2015	-
microRNA	Mus musculus	mmu-miR-17-5p	MIMAT0000649	obesity	DOID:9970	5B81	white adipose tissue	28102847	Tcf7l2	upregulation	real-time PCR/luciferase reporter assay/Western blotting	PCR;luciferase assay;Immunoblotting	Low-throughput	miR-17-5p is among central switches of adipogenic differentiation. It activates adipogenesis via repressing the Wnt signalling pathway effector Tcf7l2, and its own expression is likely nutritionally regulated in health and disease.	Curcumin represses mouse 3T3-L1 cell adipogenic differentiation via inhibiting miR-17-5p and stimulating the Wnt signalling pathway effector Tcf7l2	2017	-
microRNA	Mus musculus	mmu-miR-181a	MIMAT0000210	type 2 diabetes mellitus	DOID:9352	5A11	liver	22476949	SIRT1	upregulation	real-time PCR/luciferase reporter assays	PCR;luciferase assays	Low-throughput	miR-181a regulates SIRT1 and improves hepatic insulin sensitivity. Inhibition of miR-181a might be a potential new strategy for treating insulin resistance and type 2 diabetes.	Downregulation of miR-181a upregulates sirtuin-1 (SIRT1) and improves hepatic insulin sensitivity	2012	-
microRNA	Mus musculus	mmu-miR-181a	MIMAT0000210	hypertension	DOID:10763	BA00	kidney	23897069	Ren1	downregulation	qRT-PCR	PCR	Low-throughput	We suggest that renal hyperinnervation and enhanced sympathetically induced renin synthesis mediated by lower micro-RNA-181a contributes to hypertension in BPH/2J mice.	A novel interaction between sympathetic overactivity and aberrant regulation of renin by miR-181a in BPH/2J genetically hypertensive mice	2013	-
microRNA	Mus musculus	mmu-miR181a	MIMAT0000210	hyperlipidemia	DOID:1168	5C80.1	dendritic cells	22956783	c-Fos	upregulation	qRT-PCR/luciferase reporter assay/Western blotting	PCR;Luciferase assay;Immunoblotting	Low-throughput	We therefore suggest that miR-181a attenuates ox-LDL-stimulated immune inflammation responses by targeting c-Fos in DCs.	microRNA-181a represses ox-LDL-stimulated inflammatory response in dendritic cell by targeting c-Fos	2012	-
microRNA	Mus musculus	mmu-miR-182	MIMAT0000211	obesity	DOID:9970	5B81	brown adipocyte	25008181	-	upregulation	qRT-PCR/luciferase reporter assay/Western blotting	PCR;luciferase assay;Immunoblotting	Low-throughput	We identified miR-182 and miR-203 as new regulators of brown adipocyte development.	MicroRNAs are required for the feature maintenance and differentiation of brown adipocytes	2014	GSE60165
microRNA	Mus musculus	mmu-miR-182	MIMAT0000211	type 2 diabetes mellitus	DOID:9352	5A11	liver	30160993	MED1	upregulation	sequencing/real-time PCR	PCR	Low-throughput	In summary, these results support that colesevelam likely improves glycemic control through hepatic miR-182-5p, a mechanism that directly links cholesterol and glucose metabolism.	Intestinal bile acid sequestration improves glucose control by stimulating hepatic miR-182-5p in type 2 diabetes	2018	-
microRNA	Mus musculus	mmu-miR-183	MIMAT0000212	type 2 diabetes mellitus	DOID:9352	5A11	liver	30160993	MED1	upregulation	sequencing/real-time PCR	PCR	Low-throughput	In summary, these results support that colesevelam likely improves glycemic control through hepatic miR-182-5p, a mechanism that directly links cholesterol and glucose metabolism.	Intestinal bile acid sequestration improves glucose control by stimulating hepatic miR-182-5p in type 2 diabetes	2018	-
microRNA	Mus musculus	mmu-miR-183-5p	MIMAT0000212	type 2 diabetes mellitus	DOID:9352	5A11	islet	24039891	-	association	next generation sequencing	sequencing	High-throughput	In summary, this study characterizes the isomiR profile in beta cells for the first time, and also highlights the potential functional relevance of 5'-shifted isomiRs to T2D.	Beta cell 5'-shifted isomiRs are candidate regulatory hubs in type 2 diabetes	2013	GSE44262
microRNA	Mus musculus	mmu-miR-184	MIMAT0000213	type 2 diabetes mellitus	DOID:9352	5A11	islet	24109547	Slc25a22	association	qRT-PCR	PCR	Low-throughput	Our study provides new insight into the regulation of insulin secretion by glutamate transport in mitochondria.	MiR-184 regulates insulin secretion through repression of Slc25a22	2013	-
microRNA	Mus musculus	mmu-miR-192	MIMAT0000517	obesity	DOID:9970	5B81	plasma	30429322	PPARα	upregulation	RT-PCR/Western blotting	PCR;Immunoblotting	Low-throughput	Overall, our data highlight the central role of obesity-associated exosomal miRNAs in the etiopathogeny of glucose intolerance and dyslipidemia.	Obesity-associated exosomal miRNAs modulate glucose and lipid metabolism in mice	2018	-
microRNA	Mus musculus	mmu-miR-192	MIMAT0000517	obesity	DOID:9970	5B81	white adipose tissue	22496873	-	downregulation	microarray/RT-qPCR	microarray;PCR	Low-throughput	We show for the first time the up-regulation of mmu-miR-342-3p, mmu-miR-142-3p, mmu-miR-142-5p, mmu-miR-21, mmu-miR-146a, mmu-miR-146b, mmu-miR-379 and the down-regulation of mmu-miR-122, mmu-miR-133b, mmu-miR-1, mmu-miR-30a*, mmu-miR-192 and mmu-miR-203 during the development of obesity.	Differential expression of microRNAs in adipose tissue after long-term high-fat diet-induced obesity in mice	2012	GSE32419
microRNA	Mus musculus	mmu-miR-1934	MIMAT0009398	obesity	DOID:9970	5B81	adipose tissue	27013351	-	downregulation	RT-qPCR	PCR	Low-throughput	These results suggest that miR1934 is an important anti-inflammatory factor and may represent a novel mechanism for controlling AT inflammation.	miR-1934, downregulated in obesity, protects against low-grade inflammation in adipocytes	2016	-
microRNA	Mus musculus	mmu-miR-193b	MIMAT0004859	obesity	DOID:9970	5B81	brown adipocyte	21743466	Prdm16/Pparα	upregulation	qRT-PCR/luciferase reporter assay/Western blotting	PCR;luciferase assay;Immunoblotting	Low-throughput	Our results demonstrate that Mir193b-365 serves as an essential regulator for brown fat differentiation, in part by repressing myogenesis.	Mir193b-365 is essential for brown fat differentiation	2011	GSE27614
microRNA	Mus musculus	mmu-miR-194	MIMAT0000224	obesity	DOID:9970	5B81	exosomal	30170731	-	upregulation	-	-	-	Present study uncovered the correlation between circulating miR-194 and cardiac parameters in human subjects, and provided solid evidence of the therapeutic application of miR-194 sponge in combating obesity-mediated cardiac dysfunction.	Exosomal microRNA-194 causes cardiac injury and mitochondrial dysfunction in obese mice	2018	-
microRNA	Mus musculus	mmu-miR-195a	MIMAT0000225	obesity	DOID:9970	5B81	adipocyte	25903991	Zfp423	association	luciferase assays	luciferase assays	Low-throughput	Together, our data show that miR-195a is an anti-adipogenic regulator, which acts by targeting Zfp423, and further suggest the roles of miR-195a in obesity and metabolic diseases.	miR-195a inhibits adipocyte differentiation by targeting the preadipogenic determinator Zfp423	2015	-
microRNA	Mus musculus	mmu-miR-196a	MIMAT0000518	obesity	DOID:9970	5B81	white adipose tissue	22545021	Hoxc8	upregulation	real-time PCR/luciferase reporter assays	sequencing;PCR;luciferase assay;Immunoblotting	Low-throughput	The miR-196a-Hoxc8-C/EBPβ signaling pathway may be a therapeutic target for inducing brown adipogenesis to combat obesity and type 2 diabetes.	Essential role for miR-196a in brown adipogenesis of white fat progenitor cells	2012	-
microRNA	Mus musculus	mmu-miR-199a	MIMAT0000229	obesity	DOID:9970	5B81	adipose tissue	30279164	PRDM16/PGC-1α	upregulation	qPCR	PCR	Low-throughput	These observations reveal that the miR-199a/214 cluster is a key negative regulator of brown and beige fat development and thermogenesis.	Obesity-Associated miR-199a/214 Cluster Inhibits Adipose Browning via PRDM16-PGC-1α Transcriptional Network	2018	-
microRNA	Mus musculus	mmu-miR-199a-3p	MIMAT0000230	obesity	DOID:9970	5B81	adipose tissue	28803985	SCD	downregulation	luciferase assays	luciferase assay	Low-throughput	These results suggest that miR-199a-3p may promote adipocyte proliferation, while also repressing adipocyte differentiation by down-regulating SCD and changing fatty acid composition during adipogenesis.	miR-199a-3p affects adipocytes differentiation and fatty acid composition through targeting SCD	2017	-
microRNA	Mus musculus	mmu-miR-199a-3p	MIMAT0000230	obesity	DOID:9970	5B81	brown adipocyte	29753771	mTOR	downregulation	-	-	-	Our results point to a novel role for miR-199a-3p and its downstream effector mTOR in human brown adipocyte differentiation and maintenance of thermogenic characteristics, which can be manipulated as therapeutic targets against obesity and its related metabolic disorders.	miR-199a-3p regulates brown adipocyte differentiation through mTOR signalling pathway	2018	-
microRNA	Mus musculus	mmu-miR-19a	MIMAT0000651	hyperlipidemia	DOID:1168	5C80.1	carotid arteries	26483345	CXCL1	association	qRT-PCR/Western blotting/Immunostaining	PCR;Immunoblotting	Low-throughput	These results indicate that hyperlipidemia upregulates HIF-1α expression in ECs by mildly oxidized low-density lipoprotein-derived unsaturated lysophosphatidic acid. Endothelial HIF-1α promoted atherosclerosis by triggering miR-19a-mediated CXCL1 expression and monocyte adhesion, indicating that inhibition of the endothelial HIF-1α/miR-19a pathway may be a therapeutic option against atheroscleros…	Endothelial Hypoxia-Inducible Factor-1α Promotes Atherosclerosis and Monocyte Recruitment by Upregulating MicroRNA-19a	2015	-
microRNA	Mus musculus	mmu-miR-19b	MIMAT0000513	obesity	DOID:9970	5B81	adipose tissue	29077919	-	association	qRT-PCR/luciferase reporter assay/Western blotting	PCR;luciferase assay;Immunoblotting	Low-throughput	This study confirmed that miR-19b is an essential target for GC-mediated control of adipose tissue browning. It is hoped that the plasticity of the adipose organ can be exploited in the next generation of therapeutic strategies to combat the increasing incidence of metabolic diseases, including obesity and diabetes.	Glucocorticoids Suppress the Browning of Adipose Tissue via miR-19b in Male Mice	2018	-
microRNA	Mus musculus	mmu-miR-19b	MIMAT0000513	hypo-HDL cholesterolemia	DOID:1387	5C81.Z	macrophage	25084135	ABCA1	association	qRT-PCR/luciferase reporter assay/Western blotting	PCR;Luciferase assay;Immunoblotting	Low-throughput	MiR-19b directly regulated the expression levels of endogenous ABCA1 in foam cells derived from human THP-1 macrophages and mouse peritoneal macrophages (MPMs) as determined by qRT-PCR and western blot.	MicroRNA-19b promotes macrophage cholesterol accumulation and aortic atherosclerosis by targeting ATP-binding cassette transporter A1	2014	-
microRNA	Mus musculus	mmu-miR-19b	MIMAT0000513	obesity	DOID:9970	5B81	testis	26658372	-	association	qRT-PCR/microarray/RNA-seq	PCR;microarray;sequencing	High-throughput	Our results indicate that acquired food-induced trait inheritance might be enacted by RNA signalling.	RNA-mediated paternal heredity of diet-induced obesity and metabolic disorders	2015	GSE44301
microRNA	Mus musculus	mmu-miR-19b-3p	MIMAT0000513	hyperlipidemia	DOID:1168	5C80.1	liver	28284064	FOXO1/SREBP-1c/SREBP-2/Insig-1/ChREBP	upregulation	RNA-seq/qRT-PCR	sequencing;PCR	High-throughput	This study presents a comprehensive analysis of a new set of hepatic miRNAs, which were altered by high-fructose diet and provides novel insights into the interaction between miRNAs and their target genes in the development of metabolic syndrome.	Aberrant expression of microRNA induced by high-fructose diet: implications in the pathogenesis of hyperlipidemia and hepatic insulin resistance	2017	-
microRNA	Mus musculus	mmu-miR-1a-3p	MIMAT0000123	type 2 diabetes mellitus	DOID:9352	5A11	liver	30820263	Ppp1r3b/Akt2/Creb5	downregulation	sequencing/qRT-PCR	sequencing;PCR	High-throughput	Taken together, our results defined miRNA expression signature that may lead to hepatic IR in mice, and the findings provided a foundation for future studies to further explore the effects and underlying mechanisms of the miRNAs and their target genes in the pathogenesis of hepatic IR and related diseases.	High-throughput sequencing of small RNAs and analysis of differentially expressed microRNAs associated with high-fat diet-induced hepatic insulin resistance in mice	2019	-
microRNA	Mus musculus	mmu-miR-200	MIMAT0000519	type 2 diabetes mellitus	DOID:9352	5A11	islet	25985365	p58IPK/Xiap/Trp53	upregulation	qPCR/luciferase reporter assay	PCR;luciferase assays	Low-throughput	Our results reveal a crucial role for the miR-200 family in beta cell survival and the pathophysiology of diabetes.	The microRNA-200 family regulates pancreatic beta cell survival in type 2 diabetes	2015	GSE58488
microRNA	Mus musculus	mmu-miR-200a	MIMAT0000519	obesity	DOID:9970	5B81	hypothalamus	24394757	IRS2	upregulation	-	-	-	These findings link the alteration of leptin and insulin signaling to the up-regulation of hypothalamic miR-200a which could be a new target for treatment of obesity.	The over-expression of miR-200a in the hypothalamus of ob/ob mice is linked to leptin and insulin signaling impairment	2014	-
microRNA	Mus musculus	mmu-miR-200a	MIMAT0000519	obesity	DOID:9970	5B81	adipocyte	27655719	-	association	real-time PCR/luciferase reporter assay/Western blotting	PCR;luciferase assay;Immunoblotting	Low-throughput	For the first time, our studies demonstrated the essential role of miR-200b/a/429 in adipocytes in the regulation of HFD-induced whole-body metabolic changes.	Adipocyte miR-200b/a/429 ablation in mice leads to high-fat-diet-induced obesity	2016	-
microRNA	Mus musculus	mmu-miR-200a	MIMAT0000519	obesity	DOID:9970	5B81	white adipose tissue	24758184	-	downregulation	microarray/RT-qPCR	microarray;PCR	Low-throughput	Taken together, our data indicate that the dysregulated expression of miRNAs occurs in distinct cell types and is likely to affect cell-specific function(s) of obese WAT.	Cell-specific dysregulation of microRNA expression in obese white adipose tissue	2014	-
microRNA	Mus musculus	mmu-miR-200b	MIMAT0000233	obesity	DOID:9970	5B81	adipocyte	29864940	KLF4	downregulation	luciferase assays	luciferase assay	Low-throughput	Taken together, these results indicate that miR-200b may be involved in	MicroRNA-200b regulates preadipocyte proliferation and differentiation by targeting KLF4	2018	-
microRNA	Mus musculus	mmu-miR-200b	MIMAT0000233	metabolic syndrome	DOID:14221	5A44	preadipocyte	29864940	KLF4	downregulation	qPCR/luciferase reporter assay	PCR;luciferase assay	Low-throughput	These results indicate that miR-200b may be involved in adipogenesis and could be a target for therapeutic intervention in obesity and metabolic syndrome.	MicroRNA-200b regulates preadipocyte proliferation and differentiation by targeting KLF4	2018	-
microRNA	Mus musculus	mmu-miR-200b	MIMAT0000233	obesity	DOID:9970	5B81	adipocyte	27655719	-	association	real-time PCR/luciferase reporter assay/Western blotting	PCR;luciferase assay;Immunoblotting	Low-throughput	For the first time, our studies demonstrated the essential role of miR-200b/a/429 in adipocytes in the regulation of HFD-induced whole-body metabolic changes.	Adipocyte miR-200b/a/429 ablation in mice leads to high-fat-diet-induced obesity	2016	-
microRNA	Mus musculus	mmu-miR-200b	MIMAT0000233	obesity	DOID:9970	5B81	white adipose tissue	24758184	-	downregulation	microarray/RT-qPCR	microarray;PCR	Low-throughput	Taken together, our data indicate that the dysregulated expression of miRNAs occurs in distinct cell types and is likely to affect cell-specific function(s) of obese WAT.	Cell-specific dysregulation of microRNA expression in obese white adipose tissue	2014	-
microRNA	Mus musculus	mmu-miR-203	MIMAT0000236	obesity	DOID:9970	5B81	white adipose tissue	22496873	-	downregulation	microarray/RT-qPCR	microarray;PCR	Low-throughput	We show for the first time the up-regulation of mmu-miR-342-3p, mmu-miR-142-3p, mmu-miR-142-5p, mmu-miR-21, mmu-miR-146a, mmu-miR-146b, mmu-miR-379 and the down-regulation of mmu-miR-122, mmu-miR-133b, mmu-miR-1, mmu-miR-30a*, mmu-miR-192 and mmu-miR-203 during the development of obesity.	Differential expression of microRNAs in adipose tissue after long-term high-fat diet-induced obesity in mice	2012	GSE32419
microRNA	Mus musculus	mmu-miR-203	MIMAT0000236	obesity	DOID:9970	5B81	brown adipocyte	25008181	-	upregulation	qRT-PCR/luciferase reporter assay/Western blotting	PCR;luciferase assay;Immunoblotting	Low-throughput	We identified miR-182 and miR-203 as new regulators of brown adipocyte development.	MicroRNAs are required for the feature maintenance and differentiation of brown adipocytes	2014	GSE60165
microRNA	Mus musculus	mmu-miR-204	MIMAT0000237	obesity	DOID:9970	5B81	adipocyte	30697738	TGFBR2/ELOVL6	association	qRT-PCR/luciferase reporter assay/Western blotting	PCR;luciferase assay;Immunoblotting	Low-throughput	Our study provides a novel insight into the role of bta-miR-204 in the regulation of adipocyte growth and development, which may provide a novel therapeutic alternative against obesity.	Role of bta-miR-204 in the regulation of adipocyte proliferation, differentiation, and apoptosis	2019	-
microRNA	Mus musculus	mmu-miR-204-5p	MIMAT0000237	obesity	DOID:9970	5B81	adipose tissue	29775748	KLF3	downregulation	qRT-PCR/luciferase reporter assays	PCR;luciferase assay	Low-throughput	Luciferase activity assays and qRT-PCR showed that miR-204-5p regulates adipocyte differentiation by negatively regulating KLF3, a negative regulator of lipogenesis.	MicroRNA-204-5p regulates 3T3-L1 preadipocyte proliferation, apoptosis and differentiation	2018	-
microRNA	Mus musculus	mmu-miR-205	MIMAT0000238	obesity	DOID:9970	5B81	visceral adipose tissue	26664929	-	association	microarray/RT-qPCR	microarray;PCR	Low-throughput	Diet and genetics control the expression of obesity-regulated miRNAs in the visceral adipose of NZ10 mice.	Role of Micro RNA-205 in Promoting Visceral Adiposity of NZ10 Mice with Polygenic Susceptibility for Type 2 Diabetes	2015	-
microRNA	Mus musculus	mmu-miR-205-5p	MIMAT0000238	type 2 diabetes mellitus	DOID:9352	5A11	liver	30174230	FOXO	upregulation	qPCR/luciferase reporter assay	PCR;luciferase assays	Low-throughput	These findings reveal a homeostatic miRNA loop regulating insulin signalling, with potential implications for in vivo glucose metabolism.	microRNA-205-5p is a modulator of insulin sensitivity that inhibits FOXO function	2018	-
microRNA	Mus musculus	mmu-miR-206	MIMAT0000239	type 2 diabetes mellitus	DOID:9352	5A11	islet	27221121	Gck	differential expression	qRT-PCR/luciferase reporter assays	PCR;luciferase assays	Low-throughput	Our findings revealed a novel mechanism of posttranscriptional regulation of Gck by miR-206 and underline the crucial role of pancreatic islet miR-206 in the regulation of whole body glucose homeostasis in a murine model that mimics the metabolic syndrome.	MiR-206 is expressed in pancreatic islets and regulates glucokinase activity	2016	-
microRNA	Mus musculus	mmu-miR-208a	MIMAT0000520	metabolic syndrome	DOID:14221	5A44	heart	22541436	MED13	association	qRT-PCR/luciferase reporter assay/Northern blot	PCR;luciferase assay;Immunoblotting	Low-throughput	These findings reveal a role of the heart in systemic metabolic control and point to MED13 and miR-208a as potential therapeutic targets for metabolic disorders.	A cardiac microRNA governs systemic energy homeostasis by regulation of MED13	2012	GSE35904
microRNA	Mus musculus	mmu-miR-208a	MIMAT0000520	obesity	DOID:9970	5B81	heart	22541436	MED13	association	RT-PCR/Plasmids and Transfection Assays	PCR;luciferase assay	Low-throughput	These findings reveal a role of the heart in systemic metabolic control and point to MED13 and miR-208a as potential therapeutic targets for metabolic disorders.	A cardiac microRNA governs systemic energy homeostasis by regulation of MED13	2012	GSE35904
microRNA	Mus musculus	mmu-miR-21	MIMAT0000530	obesity	DOID:9970	5B81	white adipose tissue	21381024	STAT3	downregulation	qRT-PCR/luciferase reporter assay/Western blotting	PCR;luciferase assay;Immunoblotting	Low-throughput	These findings provide the evidence of the correlation between miR-21 level and adipocyte number in the white adipose tissue of HFD-induced obese mice, which provides new insights into the mechanisms of obesity.	MicroRNA 21 regulates the proliferation of human adipose tissue-derived mesenchymal stem cells and high-fat diet-induced obesity alters microRNA 21 expression in white adipose tissues	2012	-
microRNA	Mus musculus	mmu-miR-21	MIMAT0000530	type 2 diabetes mellitus	DOID:9352	5A11	adipocyte	22956257	PTEN	downregulation	qRT-PCR	PCR	Low-throughput	In this study, our data demonstrate that miR-21 reverses high glucose and high insulin induced IR in 3T3-L1 adipocytes, possibly through modulating the PTEN-AKT pathway, and miR-21 may be a new therapeutic target for metabolic diseases such as T2DM and obesity.	MiRNA-21 reverses high glucose and high insulin induced insulin resistance in 3T3-L1 adipocytes through targeting phosphatase and tensin homologue	2012	-
microRNA	Mus musculus	mmu-miR-21	MIMAT0000530	obesity	DOID:9970	5B81	white adipose tissue	22496873	-	upregulation	microarray/RT-qPCR	microarray;PCR	Low-throughput	We show for the first time the up-regulation of mmu-miR-342-3p, mmu-miR-142-3p, mmu-miR-142-5p, mmu-miR-21, mmu-miR-146a, mmu-miR-146b, mmu-miR-379 and the down-regulation of mmu-miR-122, mmu-miR-133b, mmu-miR-1, mmu-miR-30a*, mmu-miR-192 and mmu-miR-203 during the development of obesity.	Differential expression of microRNAs in adipose tissue after long-term high-fat diet-induced obesity in mice	2012	GSE32419
microRNA	Mus musculus	mmu-miR-21	MIMAT0000530	type 2 diabetes mellitus	DOID:9352	5A11	liver	28627440	FOXO1	downregulation	-	-	-	These results suggest that miR-21 is a critical regulator in hepatic gluconeogenesis and may provide a novel therapeutic target for treating insulin resistance and type 2 diabetes.	MicroRNA-21 regulates hepatic glucose metabolism by targeting FOXO1	2017	-
microRNA	Mus musculus	mmu-miR-210	MIMAT0000658	hyperlipidemia	DOID:1168	5C80.1	aorta	26254226	SPRED2	upregulation	qPCR/luciferase reporter assay	PCR;Luciferase assay;Immunoblotting	Low-throughput	Increased miR-210 and reduced SPRED2 levels were found in aorta of mice under high-fat diet and tumor tissues, which implied that miR-210 can be an underlying mechanism to explain oxLDL as a common risk factor for cardiovascular disease and gastrointestinal cancer.	Oxidized low-density lipoprotein is a common risk factor for cardiovascular diseases and gastroenterological cancers via epigenomical regulation of microRNA-210	2015	-
microRNA	Mus musculus	mmu-miR-214	MIMAT0000661	obesity	DOID:9970	5B81	adipose tissue	30279164	PRDM16/PGC-1α	upregulation	qPCR	PCR	Low-throughput	These observations reveal that the miR-199a/214 cluster is a key negative regulator of brown and beige fat development and thermogenesis.	Obesity-Associated miR-199a/214 Cluster Inhibits Adipose Browning via PRDM16-PGC-1α Transcriptional Network	2018	-
microRNA	Mus musculus	mmu-miR-217	MIMAT0000679	hypo-HDL cholesterolemia	DOID:1387	5C81.Z	serum	30041636	-	association	qRT-PCR	PCR	Low-throughput	miR-217 could down-regulate IMT and modulate the inflammation and lipid metabolism process, which indicates that miR-217 could be a potential treatment option.	MicroRNA-217 attenuates intima-media complex thickness of ascending aorta measured by ultrasound bio-microscopy and inhibits inflammation and lipid metabolism in atherosclerotic models of ApoE-/- mice	2018	-
microRNA	Mus musculus	mmu-miR-218	MIMAT0000663	type 2 diabetes mellitus	DOID:9352	5A11	islet	25489007	Stxbp1	downregulation	RT-qPCR/luciferase reporter assays	PCR;luciferase assays	Low-throughput	In summary, this study identified a pathway consisting of miR-218/322 and Stxbp1 in insulin secretion, contributing to a network of β-cell function involving miRNA.	Characterization of miR-218/322-Stxbp1 pathway in the process of insulin secretion	2015	-
microRNA	Mus musculus	mmu-miR-219	MIMAT0000664	metabolic syndrome	DOID:14221	5A44	hypothalamus	29398616	-	association	real-time PCR/ Transfections and luciferase assay/Western blot	PCR;luciferase assay;Immunoblotting	Low-throughput	Our results suggest a role for miR-219 in the mediation of the metabolic phenotype resulting from repeated weight cycling.	Hypothalamic miR-219 regulates individual metabolic differences in response to diet-induced weight cycling	2018	-
microRNA	Mus musculus	mmu-miR-219	MIMAT0000664	type 2 diabetes mellitus	DOID:9352	5A11	hippocampal tissues	29804319	-	association	RT-qPCR	PCR	Low-throughput	The findings from this study indicated that the upregulation of miR-219 decreases LTP inhibition and hippocampal neuronal cell apoptosis in T2DM mice by downregulating the NMDAR signaling pathway, therefore suggesting that MiR-219 might be a future therapeutic strategy for T2DM.	MicroRNA-219 decreases hippocampal long-term potentiation inhibition and hippocampal neuronal cell apoptosis in type 2 diabetes mellitus mice by suppressing the NMDAR signaling pathway	2019	-
microRNA	Mus musculus	mmu-miR-219-5p	MIMAT0000664	hypertension	DOID:10763	BA00	umbilical vein endothelial cells	30118322	NRP1	association	-	-	-	Our results show that NRP1 is required for full expression of DDAH1 in endothelial cells and that NRP1 contributes to protection from low-dose angiotensin II-induced increases in blood pressure.	Neuropilin-1 maintains dimethylarginine dimethylaminohydrolase 1 expression in endothelial cells, and contributes to protection from angiotensin II-induced hypertension	2019	-
microRNA	Mus musculus	mmu-miR-21a-5p	MIMAT0000530	obesity	DOID:9970	5B81	preadipocyte	26996129	map2k3	association	luciferase assays	luciferase assay	Low-throughput	These findings suggested that miR-21a-5p inhibited BPA induced adipocyte differentiation by targeting map2k3 through MKK3/p38/MAPK in 3T3-L1 cells, providing a potential therapeutic strategy for BPA induced obesity.	MiR-21a-5p suppresses bisphenol A-induced pre-adipocyte differentiation by targeting map2k3 through MKK3/p38/MAPK	2016	-
microRNA	Mus musculus	mmu-miR-221	MIMAT0000669	obesity	DOID:9970	5B81	muscle tissue	24130336	AdipoR1	association	qRT-PCR/luciferase reporter assay/Western blotting	PCR;luciferase assay;Immunoblotting	Low-throughput	Given that adiponectin is reduced in obesity, induction of AdipoR1 could potentially enhance adiponectin beneficial effects and ameliorate insulin resistance and diabetes.	RNA-binding protein PTB and microRNA-221 coregulate AdipoR1 translation and adiponectin signaling	2014	-
microRNA	Mus musculus	mmu-miR-222-3p	MIMAT0000670	obesity	DOID:9970	5B81	visceral adipose tissue	29507687	-	upregulation	RNA-seq/qRT-PCR	sequencing;PCR	Low-throughput	In conclusion, HFD differentially regulates miRNAs and genes in different adipose depots with significant induction of genes related to lipogenesis, adipogenesis, inflammation, ER stress, and UPR in WAT compared to BAT.	An integrative transcriptomic approach to identify depot differences in genes and microRNAs in adipose tissues from high fat fed mice	2018	GSE85101
microRNA	Mus musculus	mmu-miR-223	MIMAT0000665	hypo-HDL cholesterolemia	DOID:1387	5C81.Z	liver	25246565	SR-BI	upregulation	real-time PCR/luciferase reporter assay/Western blotting	PCR;Luciferase assay;Immunoblotting	Low-throughput	We identified a critical role for miR-223 in systemic cholesterol regulation by coordinated posttranscriptional control of multiple genes in lipoprotein and cholesterol metabolism.	MicroRNA-223 coordinates cholesterol homeostasis	2014	-
microRNA	Mus musculus	mmu-miR-223-3p	MIMAT0000665	hyperlipidemia	DOID:1168	5C80.1	liver	28284064	IRS-1/Insig-1/ApoB	downregulation	RNA-seq/qRT-PCR	sequencing;PCR	High-throughput	This study presents a comprehensive analysis of a new set of hepatic miRNAs, which were altered by high-fructose diet and provides novel insights into the interaction between miRNAs and their target genes in the development of metabolic syndrome.	Aberrant expression of microRNA induced by high-fructose diet: implications in the pathogenesis of hyperlipidemia and hepatic insulin resistance	2017	-
microRNA	Mus musculus	mmu-miR-22-3p	MIMAT0000531	type 2 diabetes mellitus	DOID:9352	5A11	liver	26193896	TCF7	upregulation	qRT-PCR/luciferase reporter assays	PCR;luciferase assays	Low-throughput	Our results support a critical role for miR-22-3p and its target, Tcf7, in the pathogenesis of diabetes by upregulating gluconeogenesis. Moreover, targeting the miR-22/Tcf7/Wnt axis might hold herapeutic potential for the treatment of altered hepatic physiology during insulin resistance and type 2 diabetes.	Elevated Hepatic miR-22-3p Expression Impairs Gluconeogenesis by Silencing the Wnt-Responsive Transcription Factor Tcf7	2015	-
microRNA	Mus musculus	mmu-miR-24	MIMAT0000219	obesity	DOID:9970	5B81	liver	29787826	SR-B1	upregulation	-	-	-	Taken together, we demonstrated that obesity induced miR-24 repressed HDL uptake, steroid hormone synthesis and lipid metabolism by targeting SR-B1.	Obesity-induced overexpression of miRNA-24 regulates cholesterol uptake and lipid metabolism by targeting SR-B1	2018	-
microRNA	Mus musculus	mmu-miR-24	MIMAT0000219	hyperlipidemia	DOID:1168	5C80.1	liver	24677249	Insig1	upregulation	qRT-PCR/luciferase reporter assay/Western blotting	PCR;Luciferase assay;Immunoblotting	Low-throughput	Our findings show a novel mechanism by which miR-24 promotes hepatic lipid accumulation and hyperlipidemia by repressing Insig1, and suggest the use of miR-24 inhibitor as a potential therapeutic agent for NAFLD and/or atherosclerosis.	Inhibition of microRNA-24 expression in liver prevents hepatic lipid accumulation and hyperlipidemia	2014	-
microRNA	Mus musculus	mmu-miR-24	MIMAT0000219	hypo-HDL cholesterolemia	DOID:1387	5C81.Z	liver	29407889	SR-BI	association	RT-PCR/Western blotting	PCR;Immunoblotting	Low-throughput	These findings indicate that miR-24 accelerates atherogenesis by repressing SR-BI-mediated SLU from HDL-C.	MicroRNA-24 aggravates atherosclerosis by inhibiting selective lipid uptake from HDL cholesterol via the post-transcriptional repression of scavenger receptor class B type I	2018	-
microRNA	Mus musculus	mmu-miR-24	MIMAT0000219	type 2 diabetes mellitus	DOID:9352	5A11	islet	23761103	Hnf1a/Neurod1	upregulation	qRT-PCR/luciferase reporter assays	PCR;luciferase assays	Low-throughput	Our findings functionally link the miR-24/MODY gene regulatory pathway to the onset of type 2 diabetes and create a novel network between nutrient overload and genetic diabetes via miR-24.	MicroRNA-24/MODY gene regulatory pathway mediates pancreatic β-cell dysfunction	2013	-
microRNA	Mus musculus	mmu-miR-26a	MIMAT0000533	obesity	DOID:9970	5B81	liver	25961460	-	downregulation	qRT-PCR	PCR	Low-throughput	These findings reveal miR-26a as a regulator of liver metabolism and suggest miR-26a should be further explored as a potential target for the treatment of T2D.	MicroRNA-26a regulates insulin sensitivity and metabolism of glucose and lipids	2015	-
microRNA	Mus musculus	mmu-miR-26a	MIMAT0000533	obesity	DOID:9970	5B81	chondrocyte	26182366	-	association	real-time PCR/ChIP assay/Enzyme-linked immunosorbent assay (ELISA)	PCR;ChIP assay;Immunoblotting	Low-throughput	Thus, we identified a reciprocal inhibition between miR-26a and NF-κB downstream of non-esterified fatty acid (NEFA) signalling in obesity-related chondrocytes. Our findings provide a potential mechanism linking obesity to cartilage inflammation.	Reciprocal inhibition between miR-26a and NF-κB regulates obesity-related chronic inflammation in chondrocytes	2015	-
microRNA	Mus musculus	mmu-miR-26a	MIMAT0000533	type 2 diabetes mellitus	DOID:9352	5A11	serum	29191656	PTEN	downregulation	luciferase assays	luciferase assays	Low-throughput	In conclusion, our data indicated that miR-26a potentially contributes to the β-cell dysfunction in T2DM, and miR-26a may be a new therapeutic strategy against T2DM.	Overexpression of microRNA-26a protects against deficient β-cell function via targeting phosphatase with tensin homology in mouse models of type 2 diabetes	2018	-
microRNA	Mus musculus	mmu-miR-26a	MIMAT0000533	type 2 diabetes mellitus	DOID:9352	5A11	liver	25961460	-	downregulation	qRT-PCR	PCR	Low-throughput	These findings reveal miR-26a as a regulator of liver metabolism and suggest miR-26a should be further explored as a potential target for the treatment of T2D.	MicroRNA-26a regulates insulin sensitivity and metabolism of glucose and lipids	2015	-
microRNA	Mus musculus	mmu-miR-26b	MIMAT0000534	obesity	DOID:9970	5B81	adipocyte	28570839	PTEN	association	luciferase assays	luciferase assay	Low-throughput	Taken together, these results demonstrate that miR-26b might participate in regulating adipogenic differentiation in 3T3-L1 cells by inhibiting the PTEN expression, further highlighting the importance of miRNA in adipogenesis.	miR-26b Promotes 3T3-L1 Adipocyte Differentiation Through Targeting PTEN	2017	-
microRNA	Mus musculus	mmu-miR-27	MIMAT0000537	obesity	DOID:9970	5B81	liver	26598088	-	association	-	-	-	This is the first report for the action of miR-27 by flavonoid derivative in rodents. The action of Fla-CN might be through multiple approaches including AMPK activation and enhancement in miR-27 expression.	Anti-obesity and anti-diabetic effects of flavonoid derivative (Fla-CN) via microRNA in high fat diet induced obesity mice	2016	-
microRNA	Mus musculus	mmu-miR-27a	MIMAT0000537	obesity	DOID:9970	5B81	adipose tissue	26536844	Lox	downregulation	qRT-PCR/luciferase reporter assay/Western blotting	PCR;luciferase assay;Immunoblotting	Low-throughput	Taken together, these results suggest a novel role for miR-27 in repressing adipogenic lineage commitment by targeting Lox.	miR-27 impairs the adipogenic lineage commitment via targeting lysyl oxidase	2015	-
microRNA	Mus musculus	mmu-miR-27a	MIMAT0000537	obesity	DOID:9970	5B81	preadipocyte	28088385	PPARγ/C/EBPα	association	-	-	-	In conclusion, these results suggested a mechanism of Fla-CN for adipocyte differentiation inhibition of 3T3-L1 cells through miR-27a/b induction and AMPK activation.	Flavonoid derivative (Fla-CN) inhibited adipocyte differentiation via activating AMPK and up-regulating microRNA-27 in 3T3-L1 cells	2017	-
microRNA	Mus musculus	mmu-miR-27a	MIMAT0000537	obesity	DOID:9970	5B81	adipose tissue	20060380	PPARγ	downregulation	-	-	-	These results suggest that miR-27a would suppress adipocyte differentiation through targeting PPARgamma and thereby down-regulation of miR-27a might be associated with adipose tissue dysregulation in obesity.	miR-27a is a negative regulator of adipocyte differentiation via suppressing PPARgamma expression	2010	-
microRNA	Mus musculus	mmu-miR-27a-3p	MIMAT0000537	obesity	DOID:9970	5B81	plasma	30429322	PPARα	upregulation	RT-PCR/Western blotting	PCR;Immunoblotting	Low-throughput	Overall, our data highlight the central role of obesity-associated exosomal miRNAs in the etiopathogeny of glucose intolerance and dyslipidemia.	Obesity-associated exosomal miRNAs modulate glucose and lipid metabolism in mice	2018	-
microRNA	Mus musculus	mmu-miR-27b	MIMAT0000126	obesity	DOID:9970	5B81	brown adipose tissue	25187367	Prdm16	upregulation	qRT-PCR/luciferase reporter assay/Western blotting	PCR;luciferase assay;Immunoblotting	Low-throughput	Collectively, these results indicate that miR-27b functions as a central target of GC and as an upstream regulator of Prdm16 to control browning of WAT and, consequently, may represent a potential target in preventing obesity.	Glucocorticoids transcriptionally regulate miR-27b expression promoting body fat accumulation via suppressing the browning of white adipose tissue	2015	-
microRNA	Mus musculus	mmu-miR-27b	MIMAT0000126	obesity	DOID:9970	5B81	adipose tissue	26536844	Lox	downregulation	qRT-PCR/luciferase reporter assay/Western blotting	PCR;luciferase assay;Immunoblotting	Low-throughput	Taken together, these results suggest a novel role for miR-27 in repressing adipogenic lineage commitment by targeting Lox.	miR-27 impairs the adipogenic lineage commitment via targeting lysyl oxidase	2015	-
microRNA	Mus musculus	mmu-miR-27b	MIMAT0000126	obesity	DOID:9970	5B81	preadipocyte	28088385	PPARγ/C/EBPα	association	-	-	-	In conclusion, these results suggested a mechanism of Fla-CN for adipocyte differentiation inhibition of 3T3-L1 cells through miR-27a/b induction and AMPK activation.	Flavonoid derivative (Fla-CN) inhibited adipocyte differentiation via activating AMPK and up-regulating microRNA-27 in 3T3-L1 cells	2017	-
[truncated: 259 more rows]
